# Supplementary material for: (3 + 3) Annulation of acetoxy allenoates with enolisable carbonyl substrates leading to fused pyrans
Source: Royal Society of Chemistry journal article supplement (doi:10.1039/d3ob00597f), 2023-01-01
Supplement: d3ob00597f1.pdf [file d3ob00597f1.pdf]

## Electronic Supplementary Information

### **(3 + 3) Annulation of acetoxy allenates with with enolisable carbonyl substrates leading to fused pyrans**

Shubham Debnath, Sachin Chauhan and K. C. Kumara Swamy\*

School of Chemistry, University of Hyderabad

Hyderabad-500046, Telangana, India

e-mail: kckssc@uohyd.ac.in, kckssc@yahoo.com

| <b>S. No</b> | <b>Contents</b>                                                                                                                       | <b>Page No.</b> |
|--------------|---------------------------------------------------------------------------------------------------------------------------------------|-----------------|
| <b>1</b>     | <b>X-ray data collection, solution, refinement and the ORTEPs/Crystal Data of 3ah, 4an, 6aa and 8al</b>                               | <b>S2-S4</b>    |
| <b>2</b>     | <b><sup>1</sup>H/ <sup>13</sup>C/ <sup>19</sup>F spectra of compounds 3aa-am, 3ba, 4aa-4an, 4ba, 6aa-6an, 6aa', 8aa-8am, and 8aa'</b> | <b>S5-S49</b>   |
| <b>3</b>     | <b>Reference</b>                                                                                                                      | <b>S50</b>      |

**(1) X-ray data collection, solution, refinement and the ORTEPs/Crystal Data of 3ah, 4an, 6aa and 8al**

X-ray data collection, solution, refinement and the ORTEPs/crystal data: Single crystal X-ray data for crystals of compounds **3ah**, **4an**, **6aa** and **8al** were collected on an X-ray diffractometer using Mo-K $\alpha$  ( $\lambda = 0.71073 \text{ \AA}$ ) radiation after mounting on glass fibers inside a brass pin in open air. The structures were solved by direct methods and refined by full matrix S34 least squares method using standard procedures; absorption corrections were done using SADABS program, where applicable.<sup>1</sup> In general, all non-hydrogen atoms were refined anisotropically; hydrogen atoms were fixed by geometry or located by a Difference Fourier map and refined isotropically. The solvent/s of crystallization for all the products was ethyl acetate-hexane (ca 4:1 v/v). CCDC numbers are 2257153-2257156.

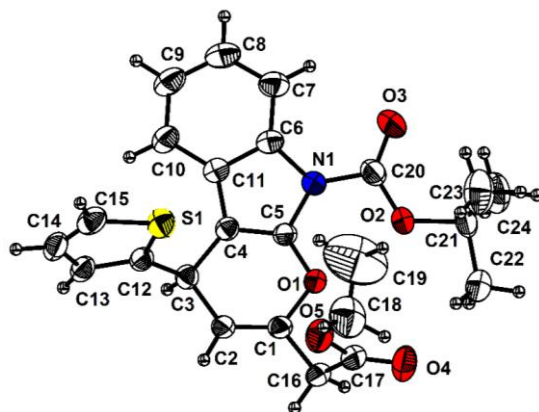

**Figure S1.** ORTEP view of **3ah** with 30% probability of ellipsoids. *Crystal data:* C<sub>24</sub>H<sub>25</sub>NO<sub>5</sub>S,  $M = 439.51$ , Triclinic, Space group  $P-1$ ,  $a = 10.3479(3)$ ,  $b = 10.5057(3)$ ,  $c = 11.7663(3) \text{ \AA}$ ,  $\alpha = 93.409(2)$ ,  $\beta = 114.609(3)$ ,  $\gamma = 95.175(2)^\circ$ ,  $V = 1151.55(6) \text{ \AA}^3$ ,  $Z = 2$ ,  $\mu = 0.175 \text{ mm}^{-1}$ , data/restraints/parameters: 4815/0/284, R indices ( $I > 2\sigma(I)$ ):  $R1 = 0.0656$ ,  $wR2$  (all data) = 0.2083. CCDC No: 2257153.

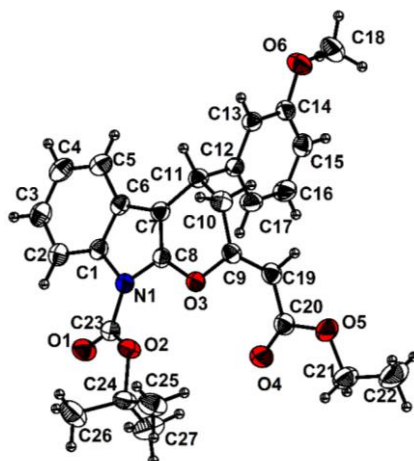

**Figure S2.** ORTEP view of **4an** with 30% probability of ellipsoids. *Crystal data:*  $C_{27}H_{29}NO_6$ ,  $M = 463.51$ , Monoclinic, Space group  $P 21/c$ ,  $a = 11.7617(4)$ ,  $b = 21.8252(8)$ ,  $c = 9.9033(3)$  Å,  $\alpha = 90$ ,  $\beta = 107.445(4)$ ,  $\gamma = 90^\circ$ ,  $V = 2425.26(15)$  Å<sup>3</sup>,  $Z = 4$ ,  $\mu = 0.090$  mm<sup>-1</sup>, data/restraints/parameters: 5137/0/312, R indices ( $I > 2\sigma(I)$ ):  $R1 = 0.0546$ ,  $wR2$  (all data) = 0.1573. CCDC No: 2257154.

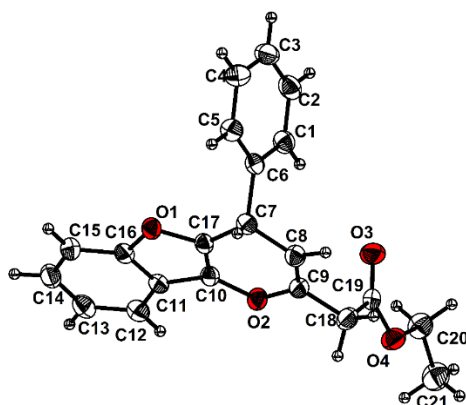

**Figure S3.** ORTEP view of **6aa** with 30% probability of ellipsoids. *Crystal data:*  $C_{21}H_{18}O_4$ ,  $M = 334.35$ , Triclinic, Space group  $P-1$ ,  $a = 8.2390(2)$ ,  $b = 8.5305(2)$ ,  $c = 12.8575(3)$  Å,  $\alpha = 72.914(2)$ ,  $\beta = 83.275(2)$ ,  $\gamma = 75.314(2)^\circ$ ,  $V = 834.67(4)$  Å<sup>3</sup>,  $Z = 2$ ,  $\mu = 0.092$  mm<sup>-1</sup>, data/restraints/parameters: 3575/0/227, R indices ( $I > 2\sigma(I)$ ):  $R1 = 0.0416$ ,  $wR2$  (all data) = 0.1170. CCDC No: 2257155.

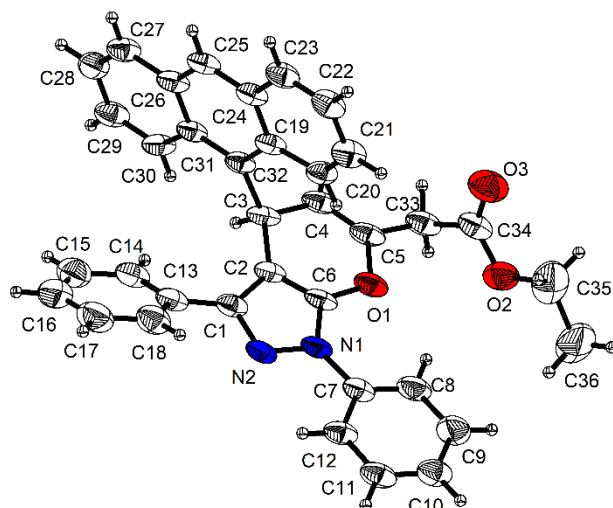

**Figure S4.** ORTEP view of **8al** with 30% probability of ellipsoids. *Crystal data:*  $C_{36}H_{28}N_2O_3$ ,  $M = 536.60$ , Triclinic, Space group  $P-1$ ,  $a = 10.5236(3)$ ,  $b = 11.4554(5)$ ,  $c = 12.9859(4)$  Å,  $\alpha = 100.268(3)$ ,  $\beta = 113.577(3)$ ,  $\gamma = 98.024(3)^\circ$ ,  $V = 1372.68(10)$  Å<sup>3</sup>,  $Z = 2$ ,  $\mu = 0.083$  mm<sup>-1</sup>, data/restraints/parameters: 4864/0/371, R indices ( $I > 2\sigma(I)$ ):  $R1 = 0.1228$ ,  $wR2$  (all data) = 0.4444. CCDC No: 2257156. The crystal quality was poor and hence ‘A’ alerts’ are there. However, the structure is clear.

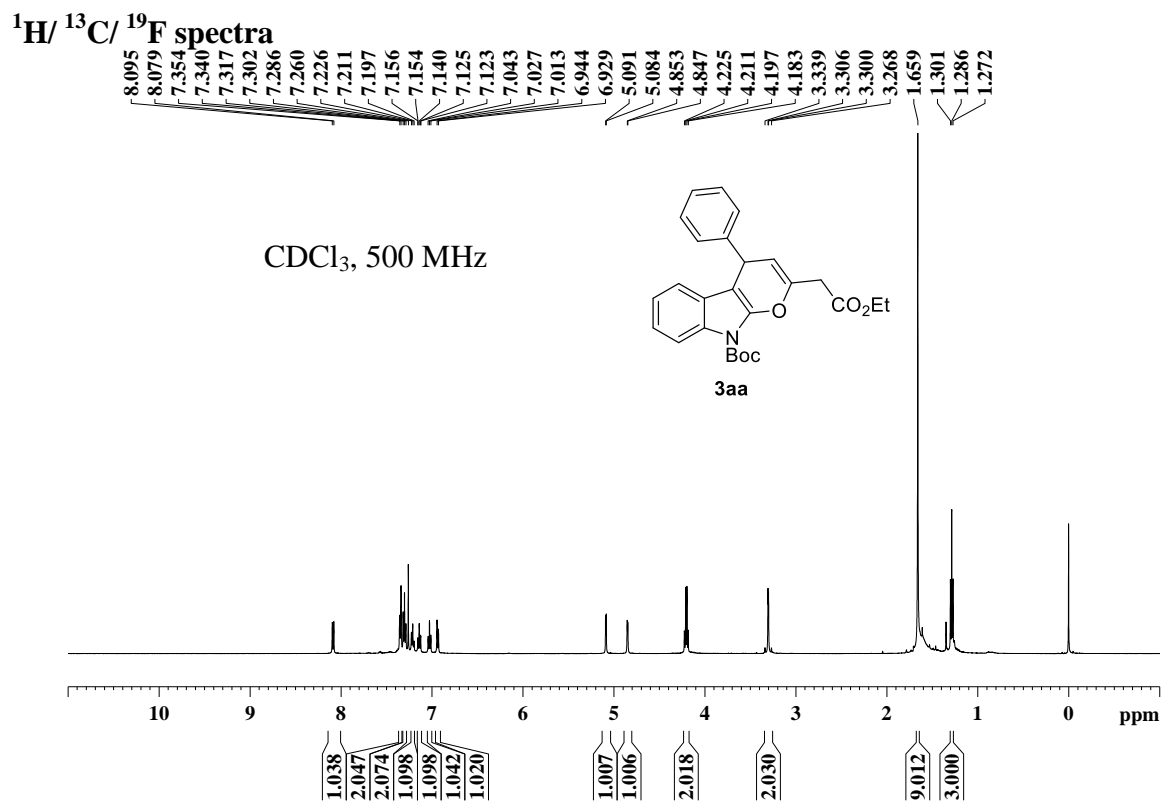

Figure S5: <sup>1</sup>H NMR spectrum of compound **3aa**

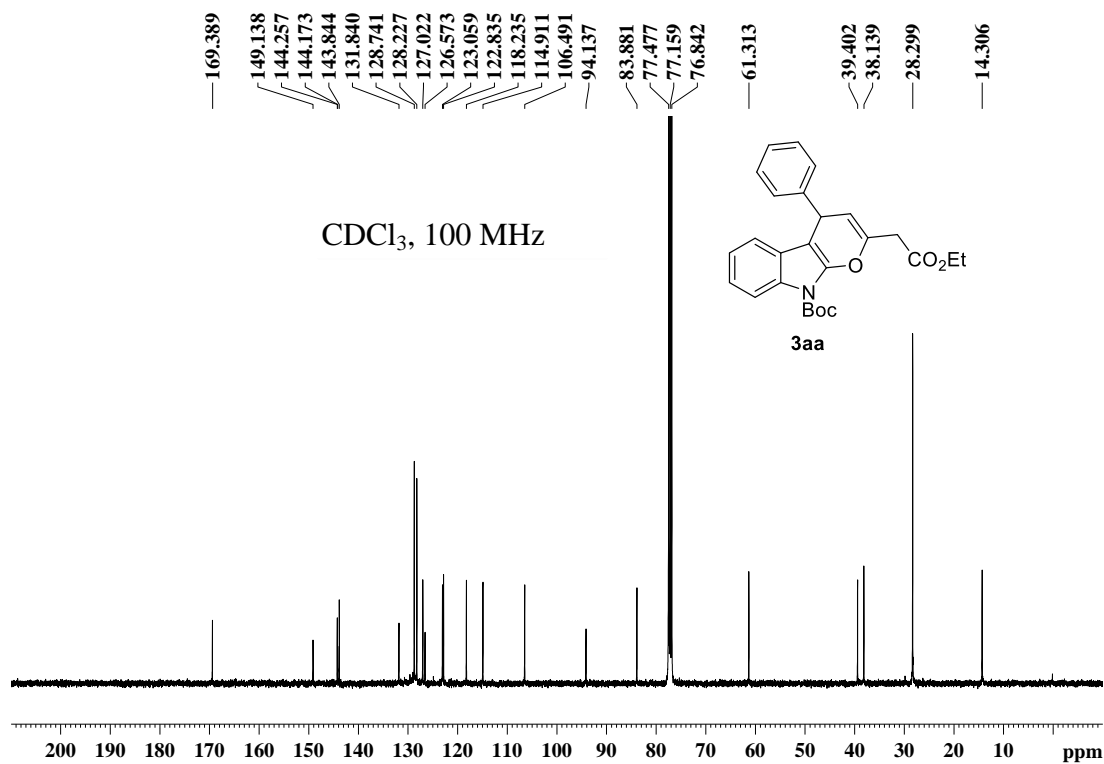

Figure S6: <sup>13</sup>C NMR spectrum of compound **3aa**

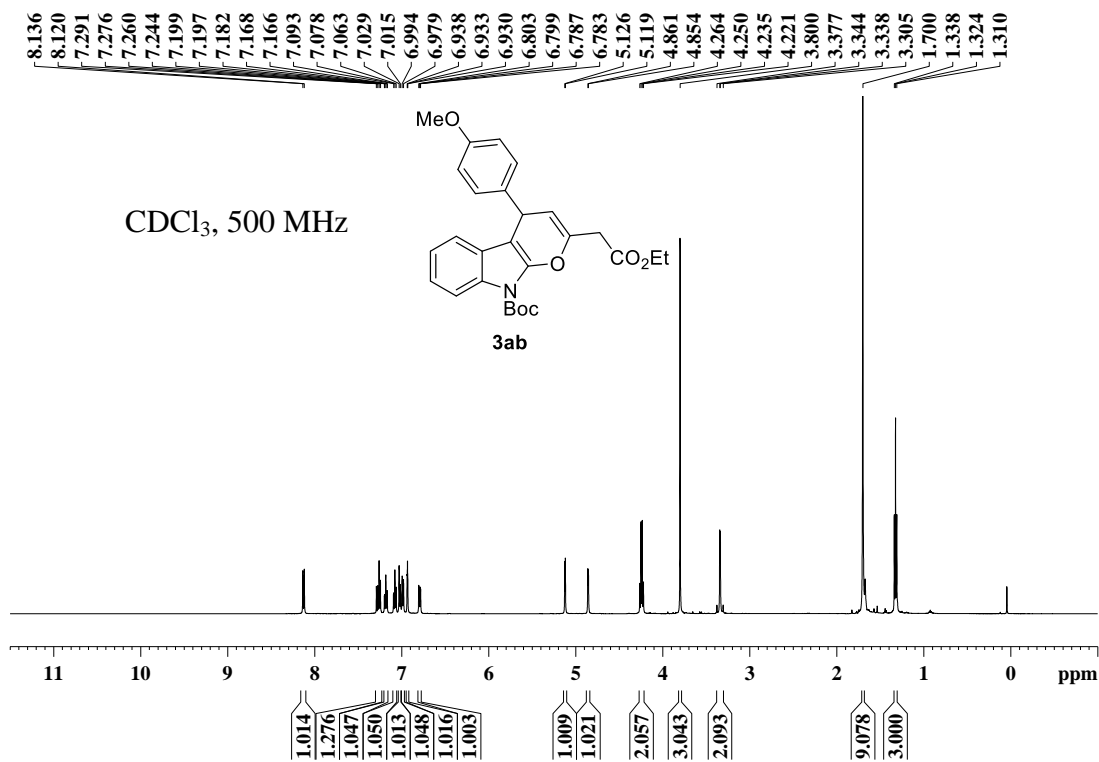

Figure S7: <sup>1</sup>H NMR spectrum of compound **3ab**

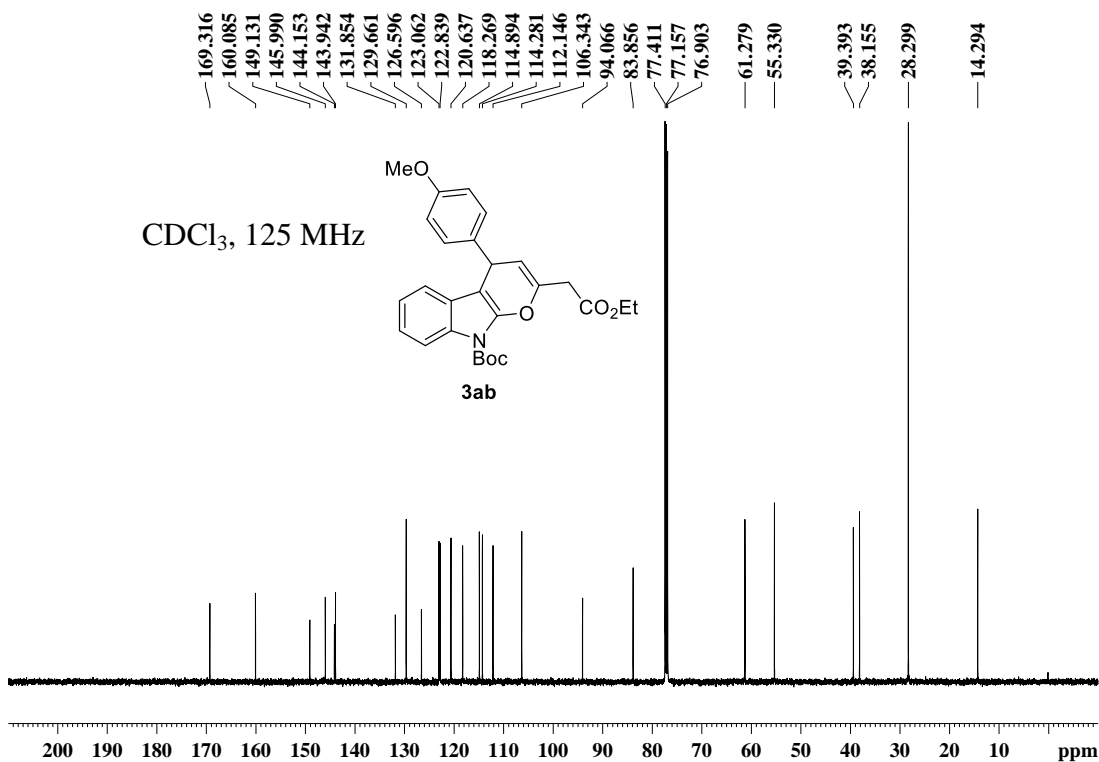

Figure S8: <sup>13</sup>C NMR spectrum of compound **3ab**

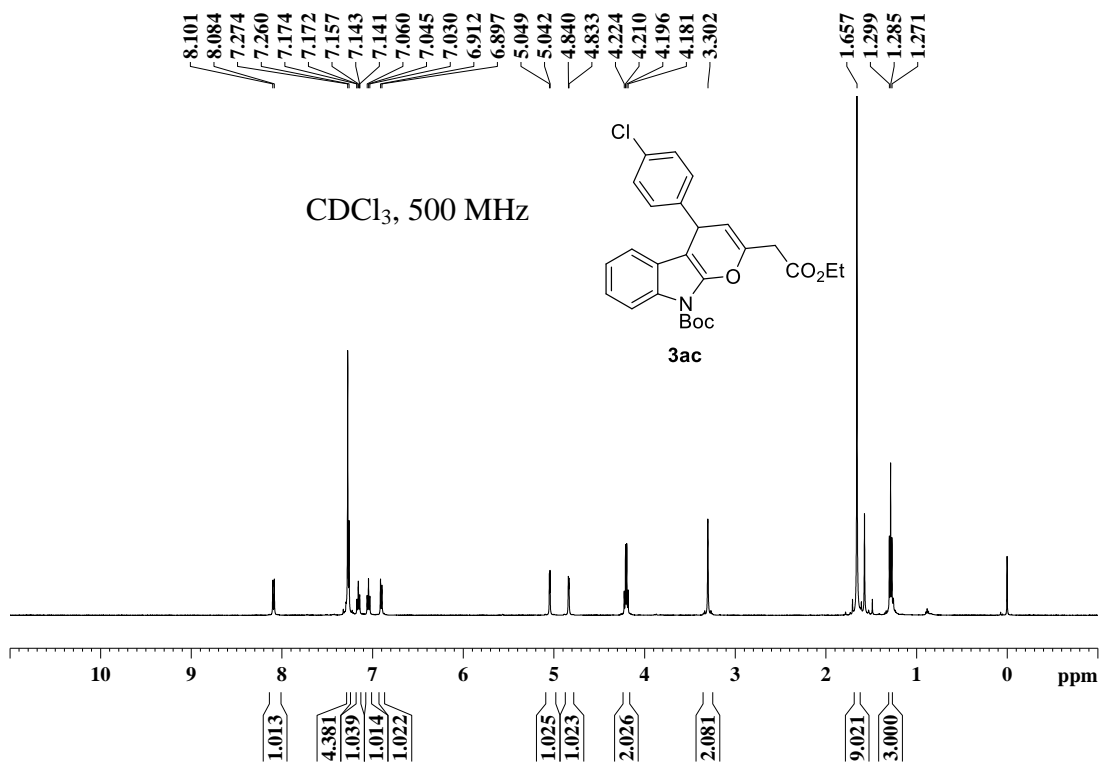

Figure S9:  $^1\text{H}$  NMR spectrum of compound **3ac**

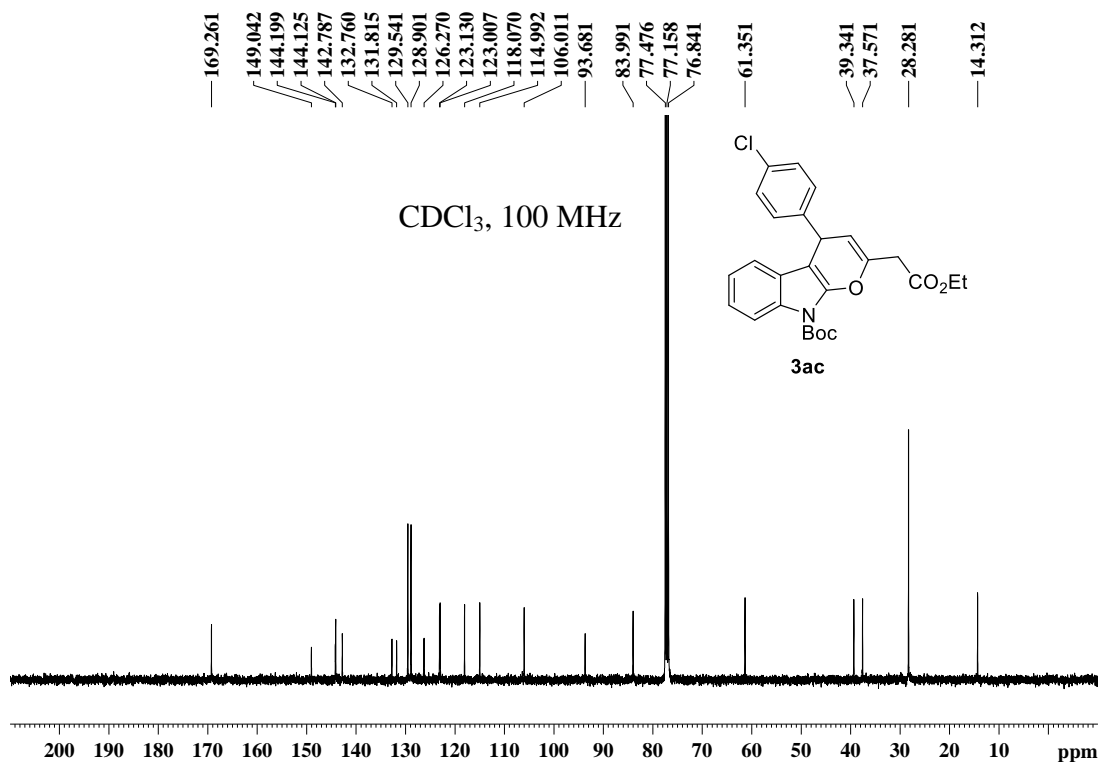

Figure S10:  $^{13}\text{C}$  NMR spectrum of compound **3ac**

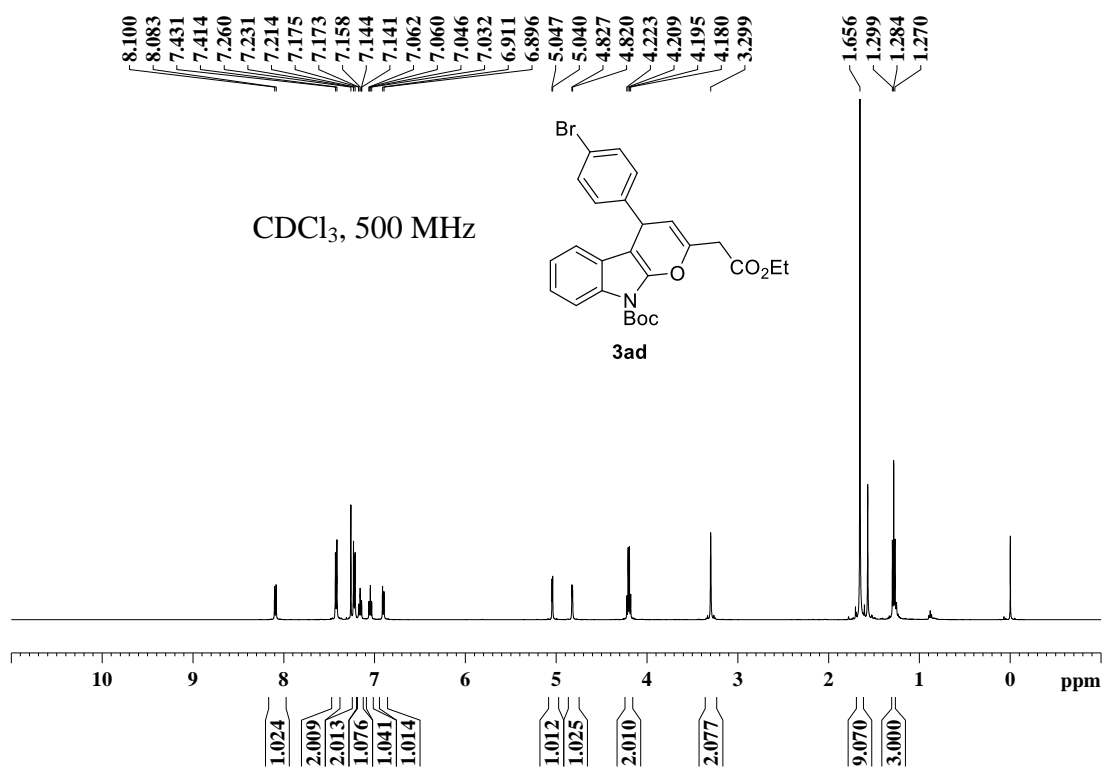

Figure S11: <sup>1</sup>H NMR spectrum of compound **3ad**

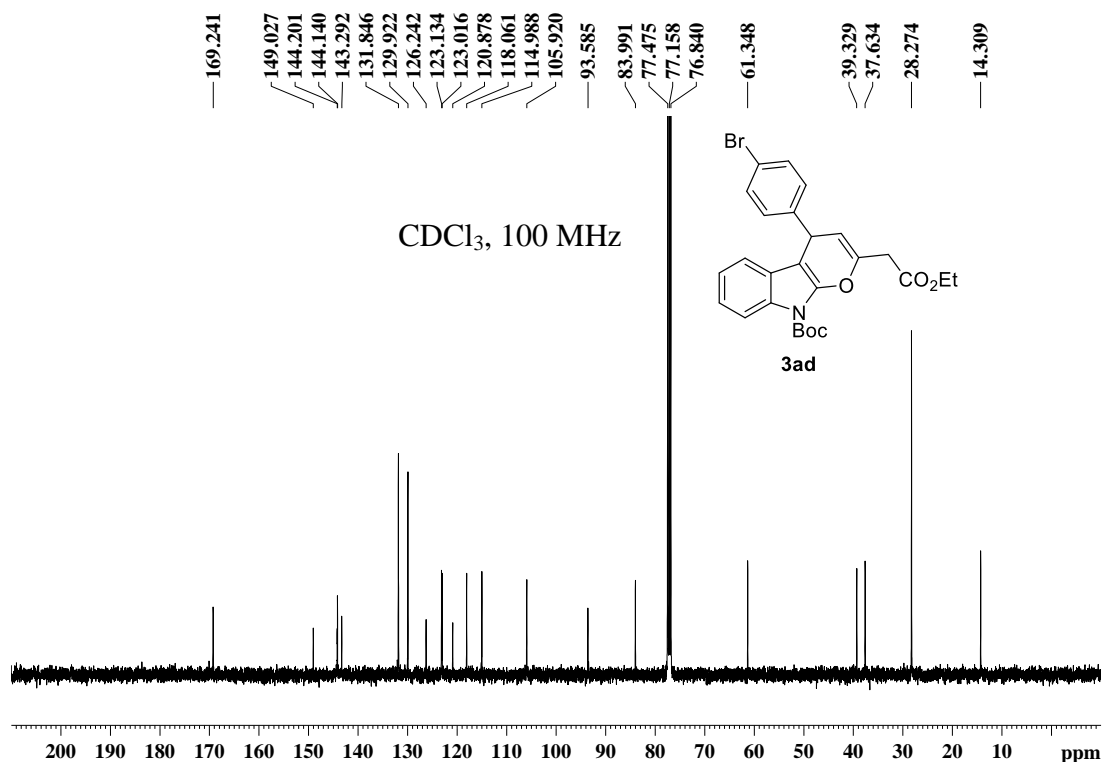

Figure S12: <sup>13</sup>C NMR spectrum of compound **3ad**



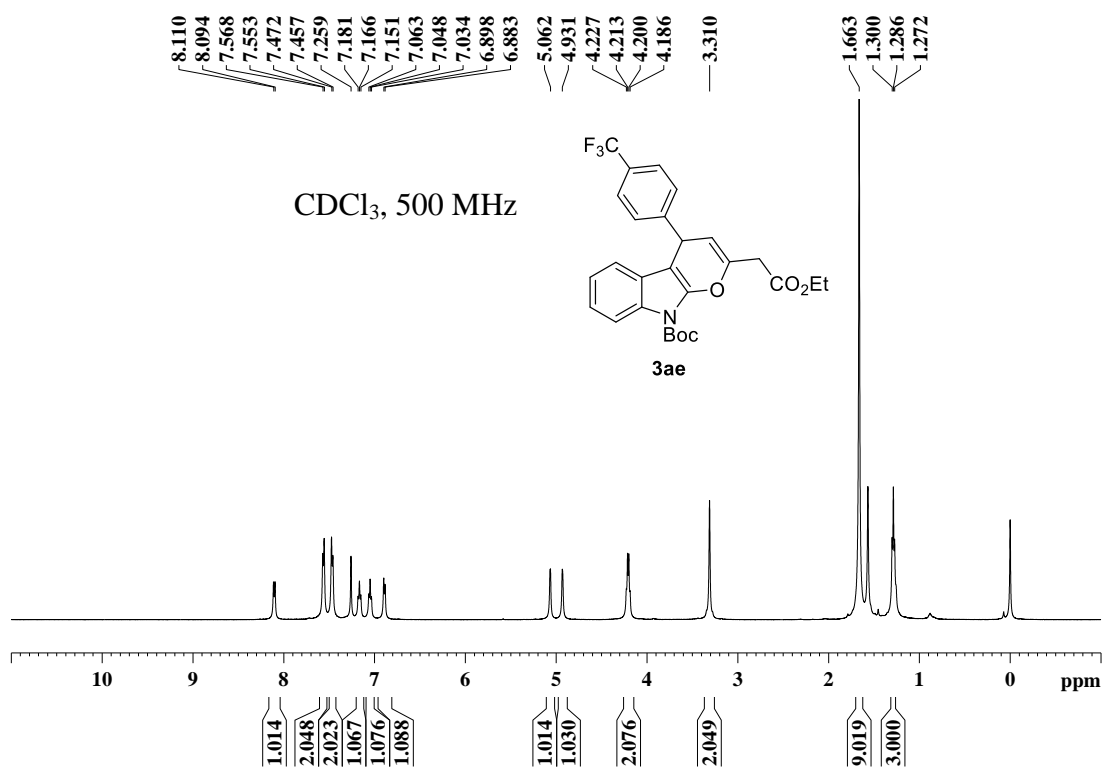

Figure S13: <sup>1</sup>H NMR spectrum of compound **3ae**

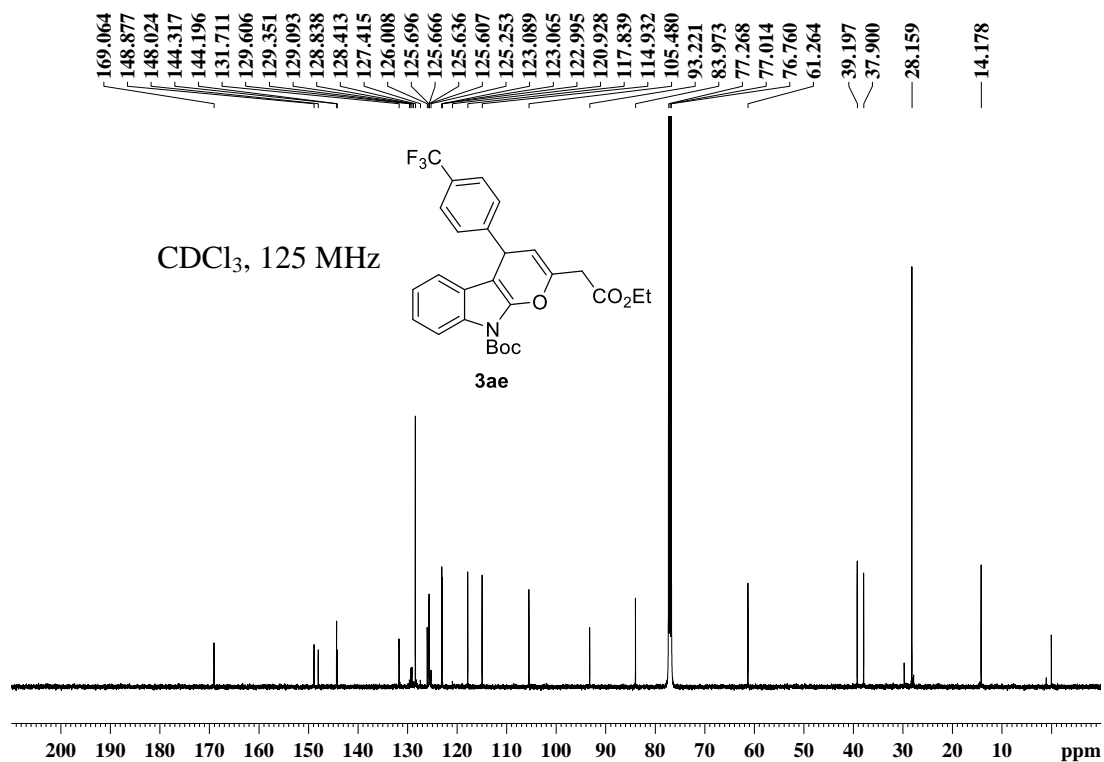

Figure S14: <sup>13</sup>C NMR spectrum of compound **3ae**

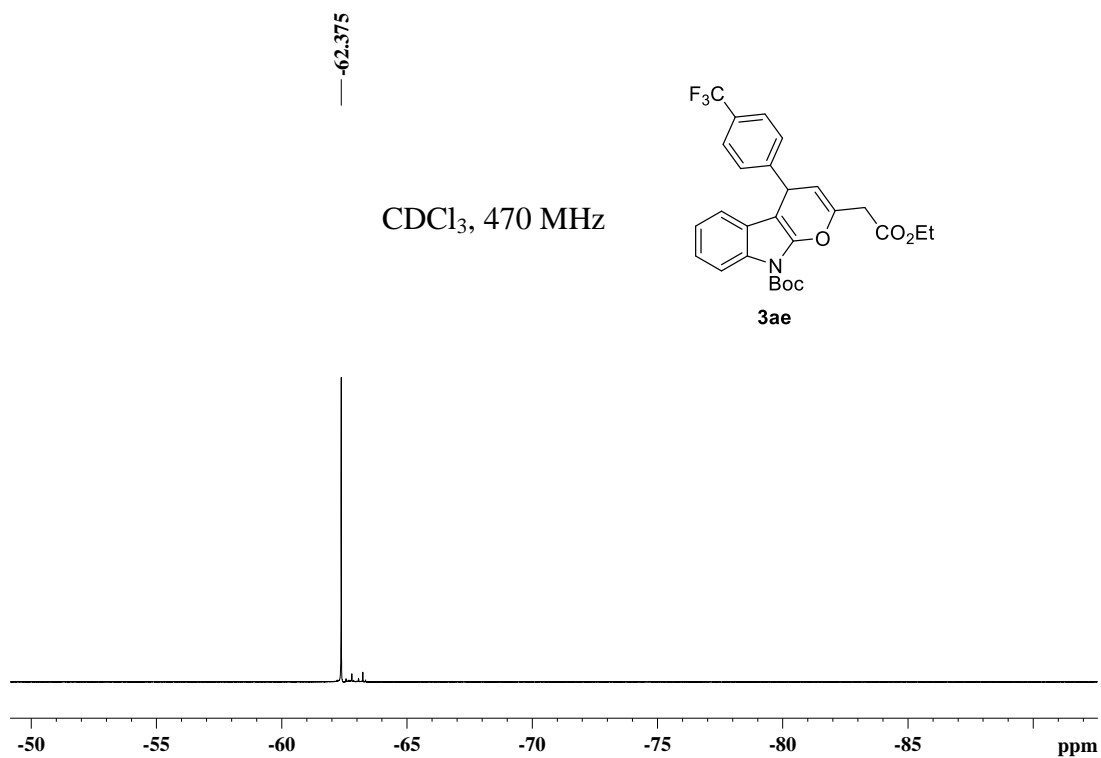

Figure S15: <sup>19</sup>F NMR spectrum of compound **3ae**

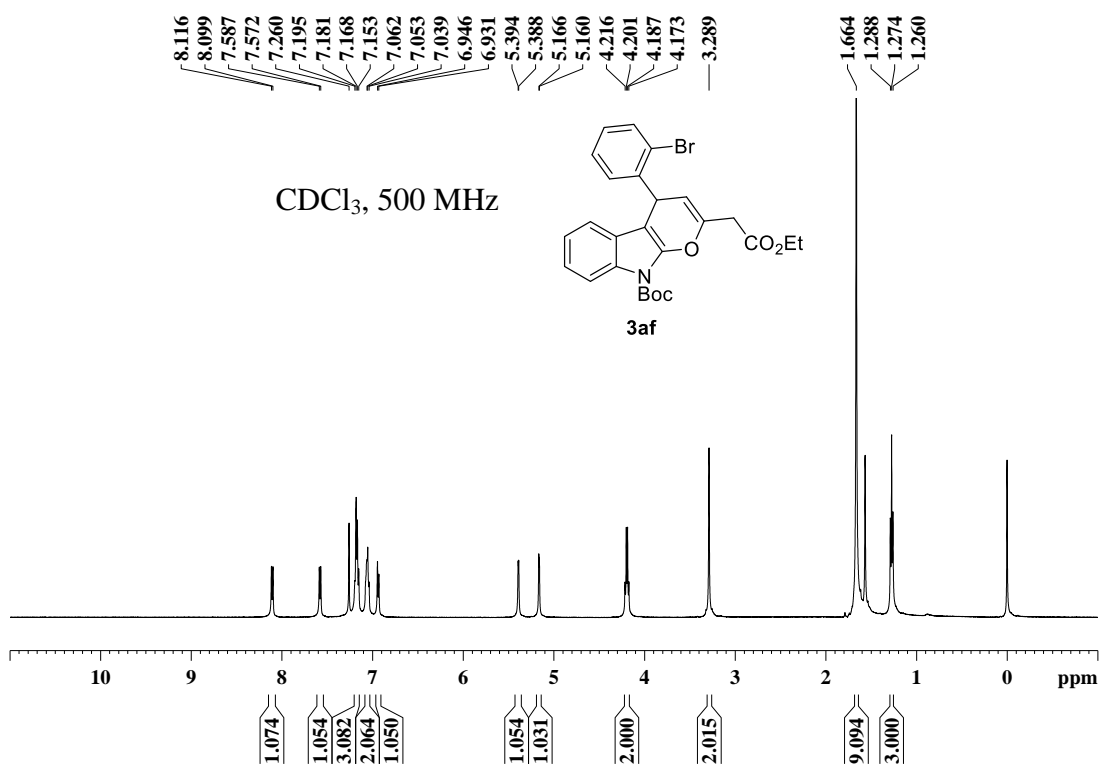

Figure S16: <sup>1</sup>H NMR spectrum of compound **3af**

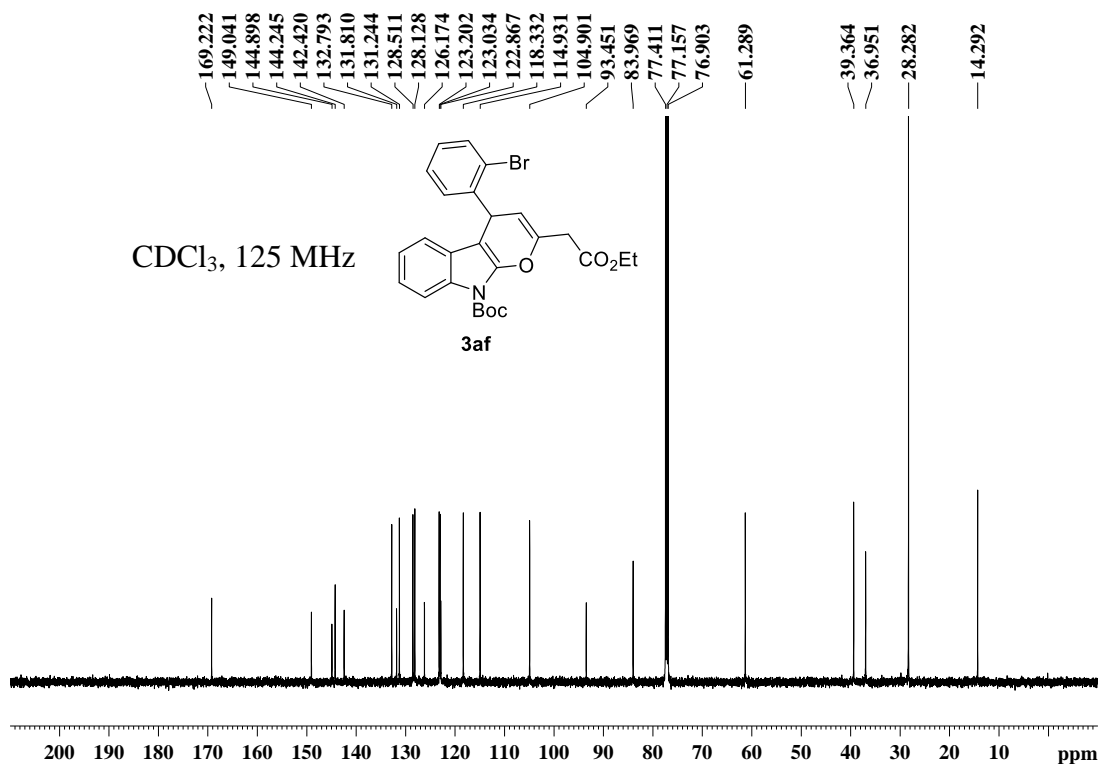

Figure S17: <sup>13</sup>C NMR spectrum of compound **3af**

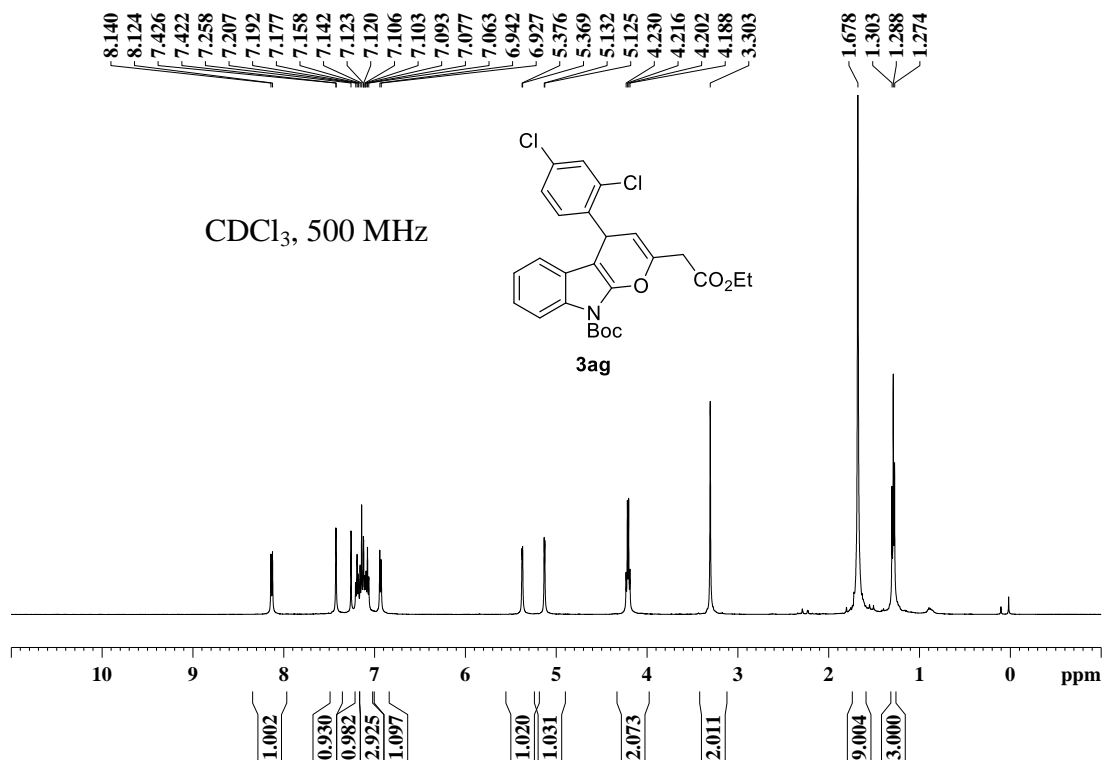

Figure S18: <sup>1</sup>H NMR spectrum of compound **3ag**

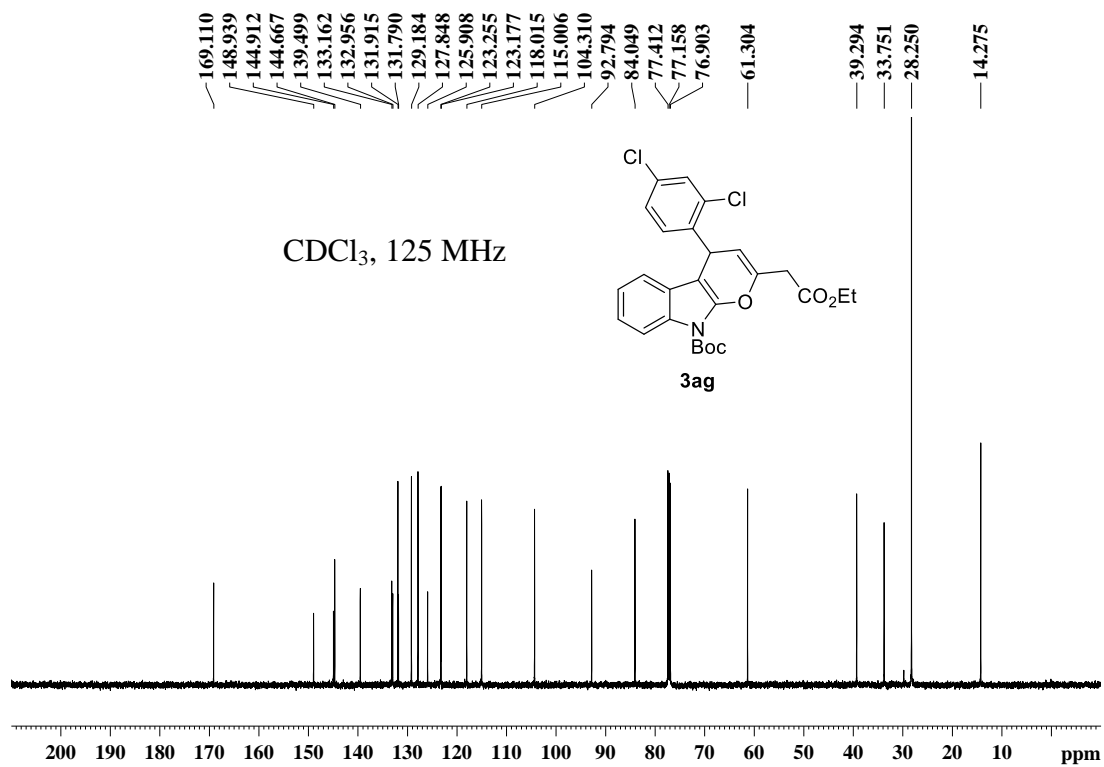

Figure S19: <sup>13</sup>C NMR spectrum of compound **3ag**

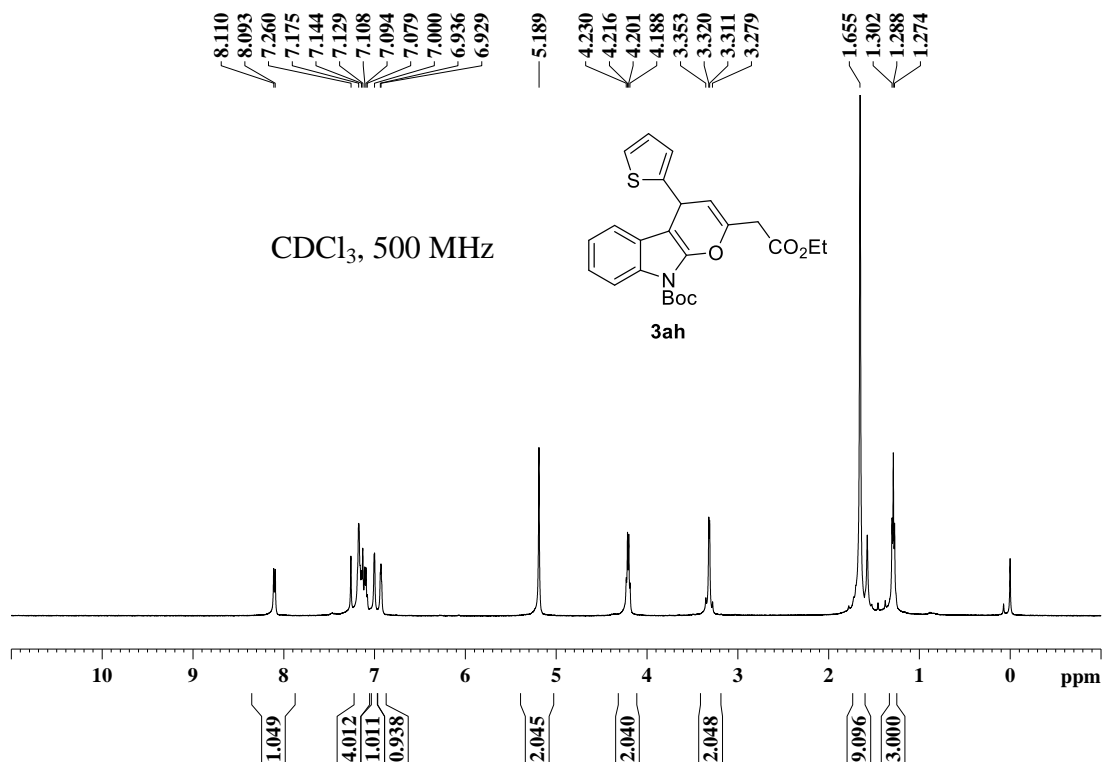

Figure S20: <sup>1</sup>H NMR spectrum of compound **3ah**

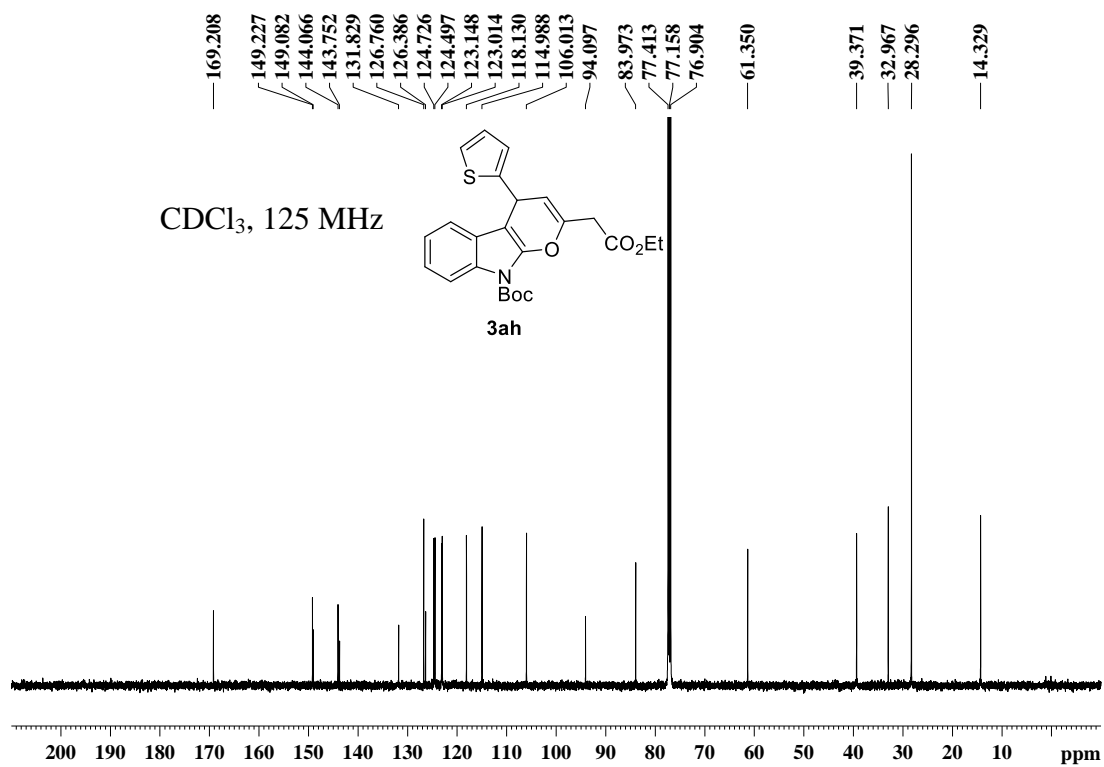

Figure S21: <sup>13</sup>C NMR spectrum of compound **3ah**

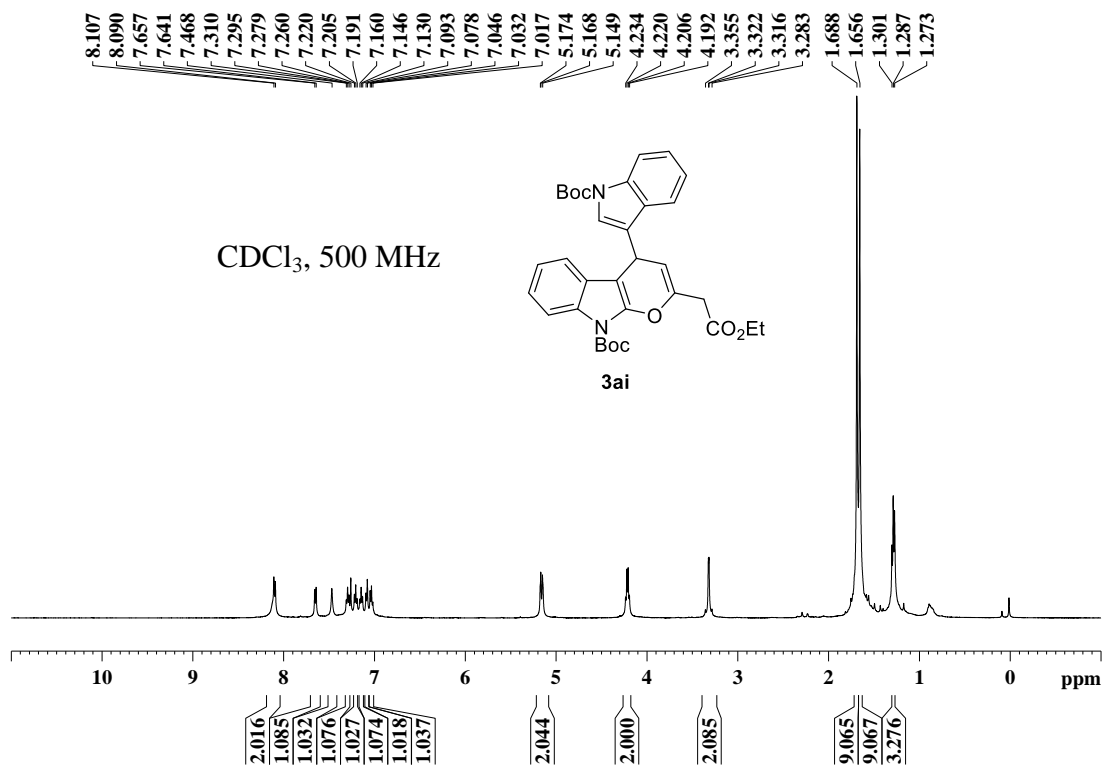

Figure S22: <sup>1</sup>H NMR spectrum of compound **3ai**

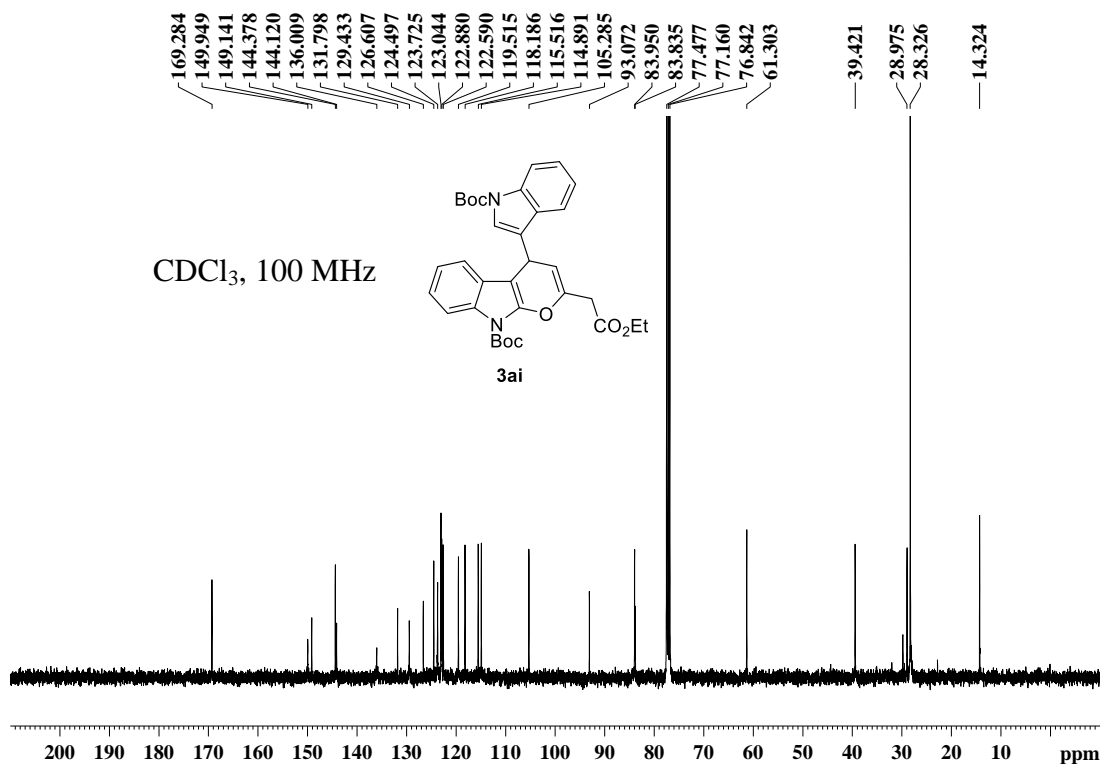

Figure S23: <sup>13</sup>C NMR spectrum of compound **3ai**

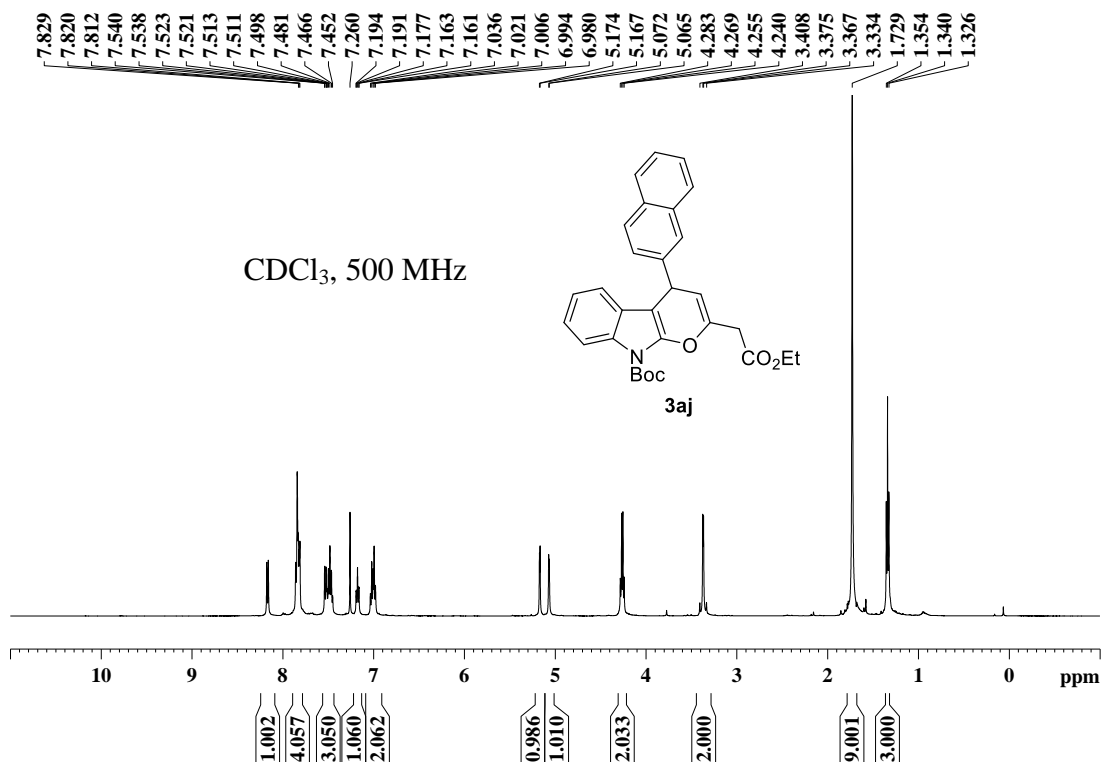

Figure S24: <sup>1</sup>H NMR spectrum of compound **3aj**

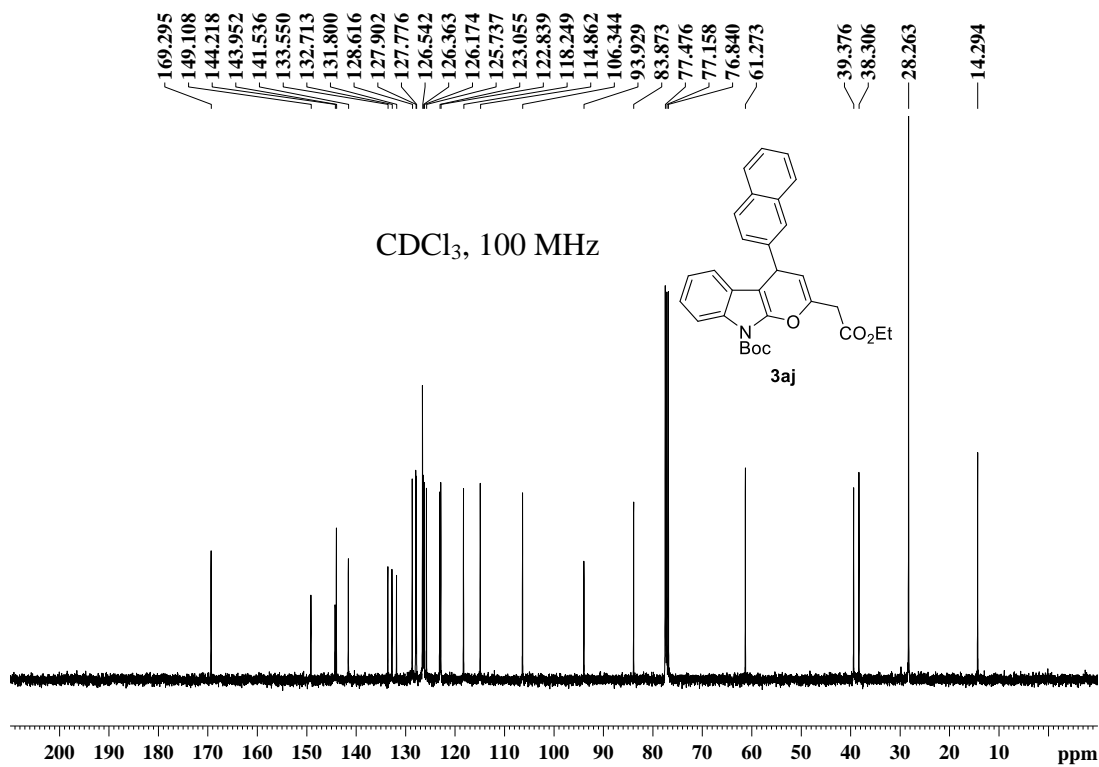

Figure S25: <sup>13</sup>C NMR spectrum of compound **3aj**

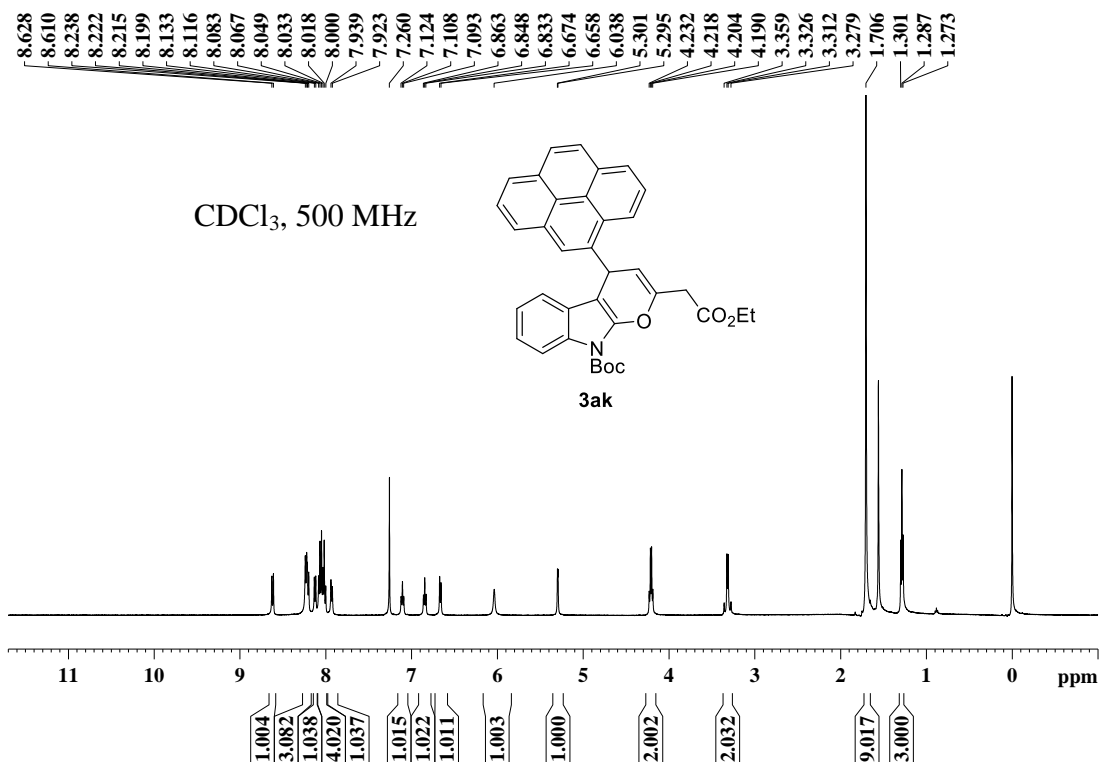

Figure S26: <sup>1</sup>H NMR spectrum of compound **3ak**

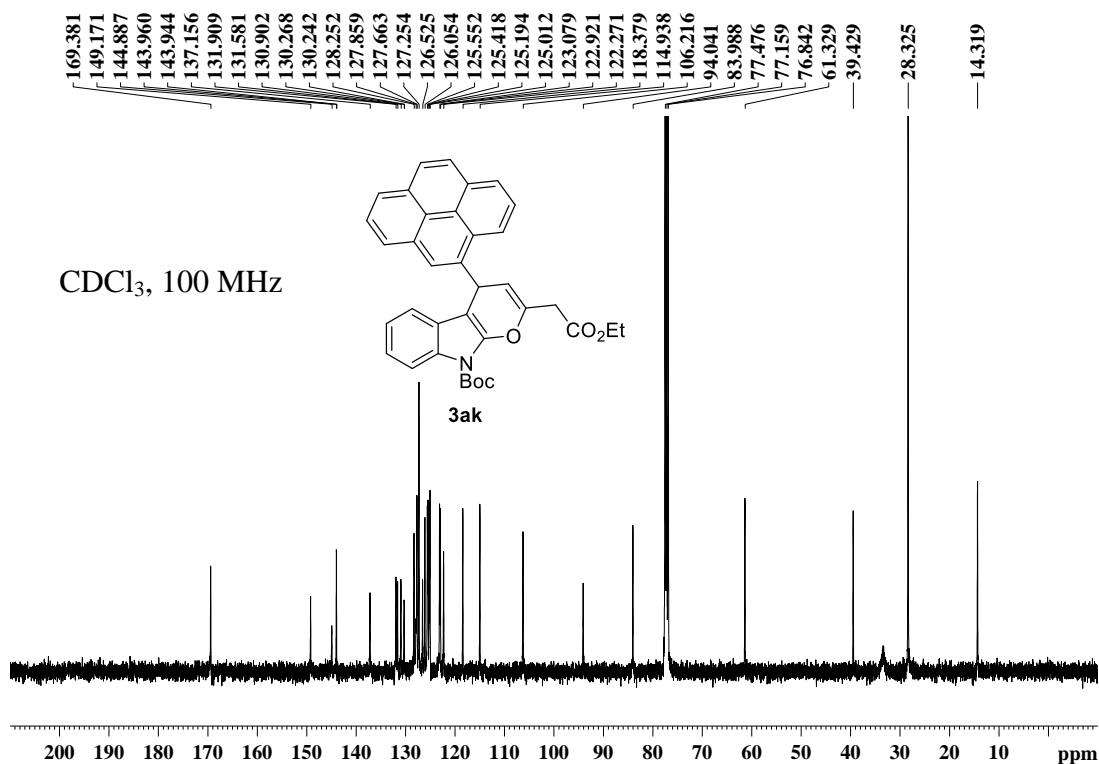

Figure S27: <sup>13</sup>C NMR spectrum of compound **3ak**

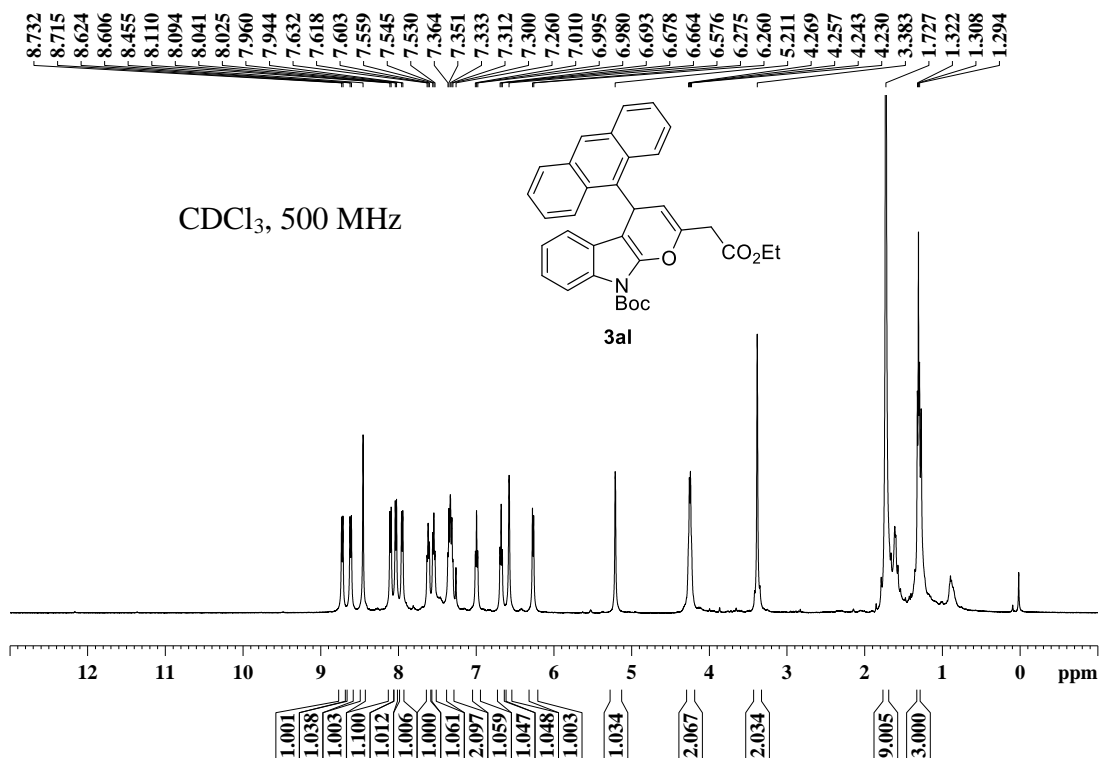

Figure S28: <sup>1</sup>H NMR spectrum of compound **3al**



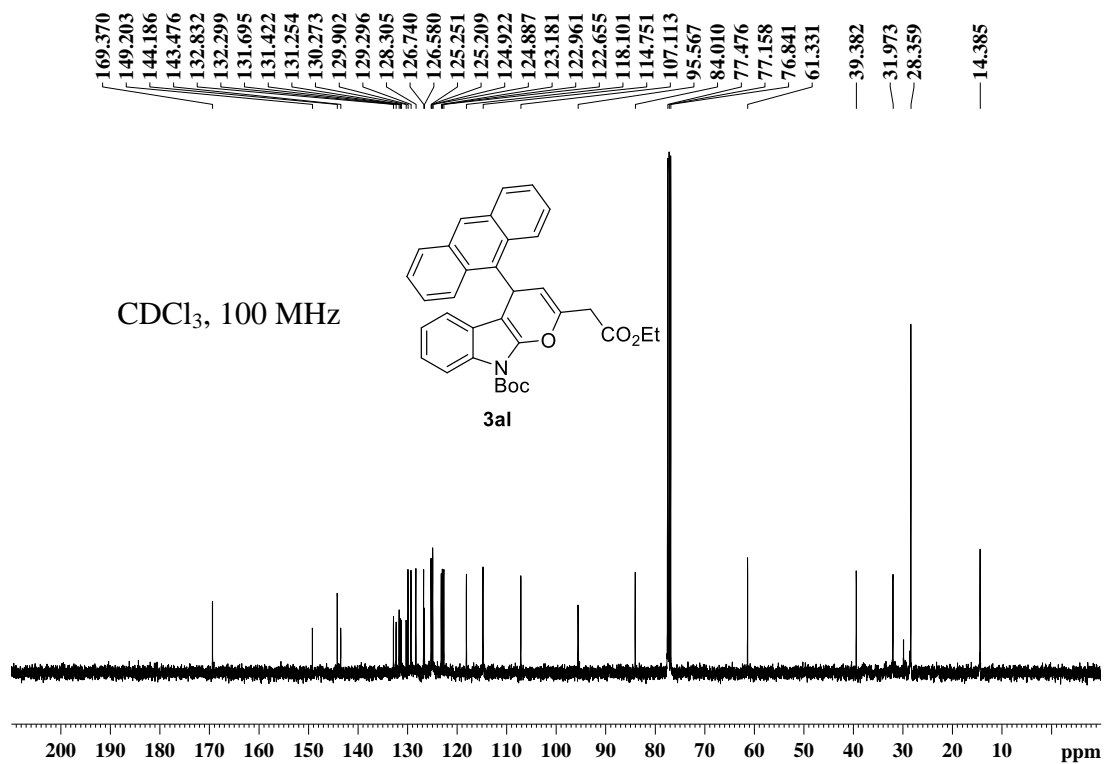

Figure S29: <sup>13</sup>C NMR spectrum of compound **3al**

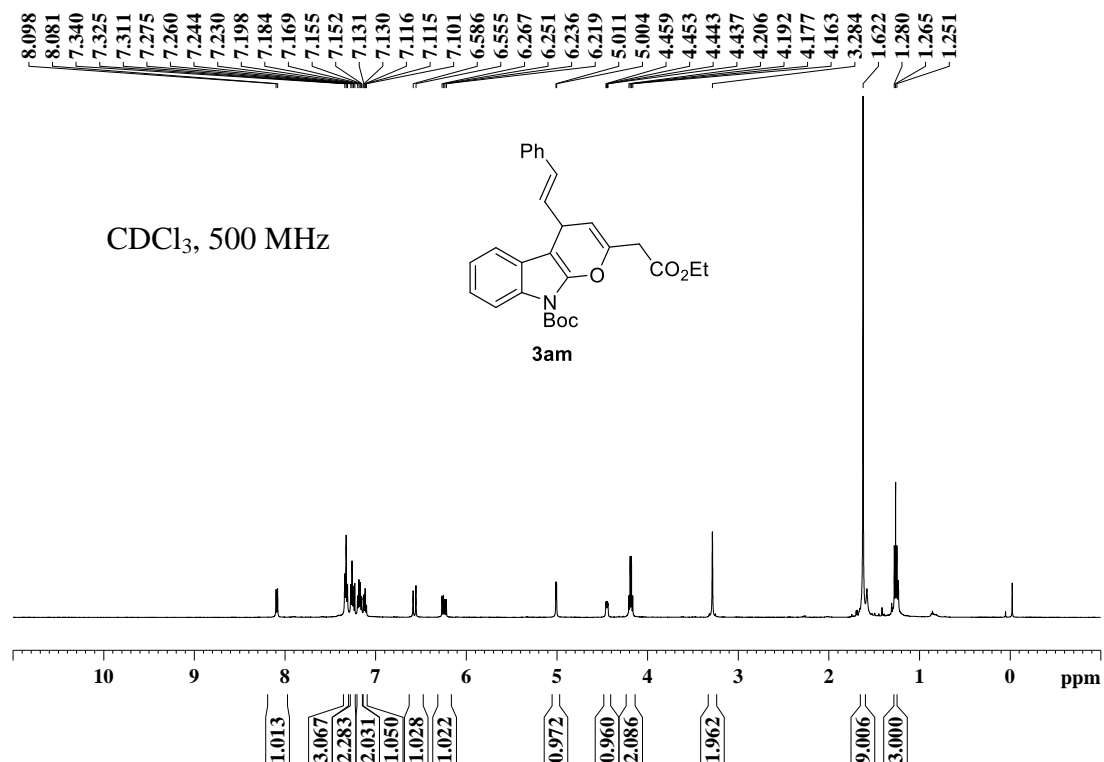

Figure S30: <sup>1</sup>H NMR spectrum of compound **3am**

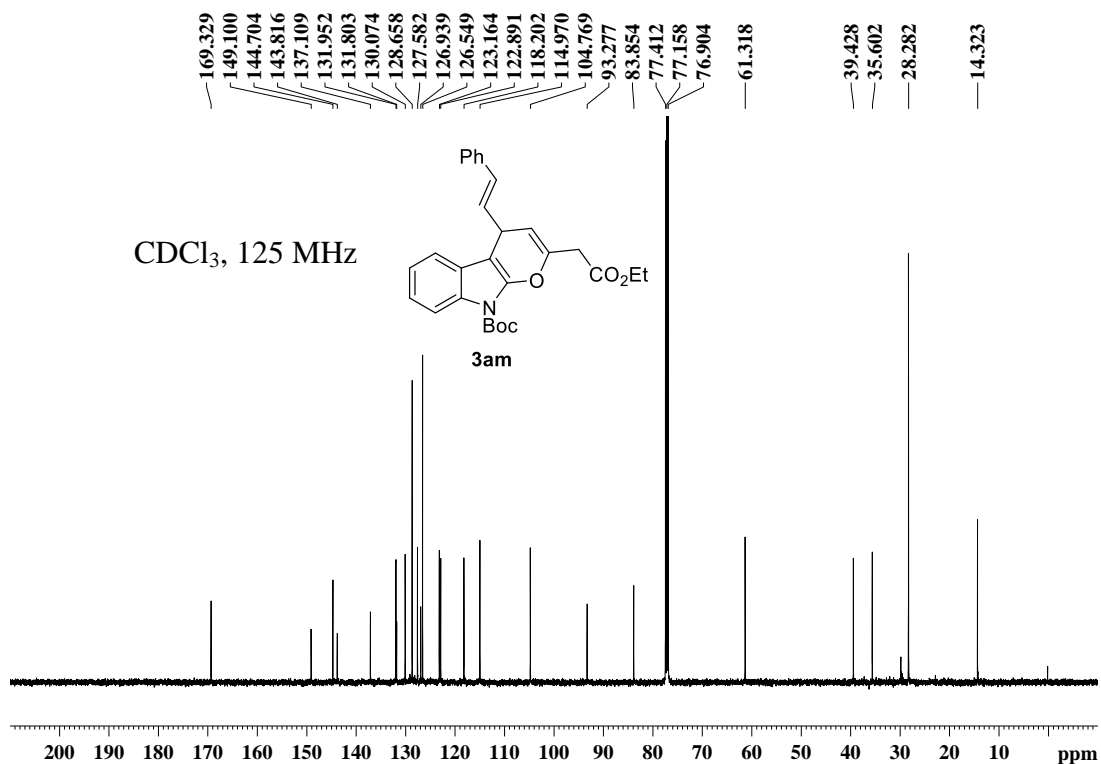

Figure S31:  $^{13}\text{C}$  NMR spectrum of compound **3am**

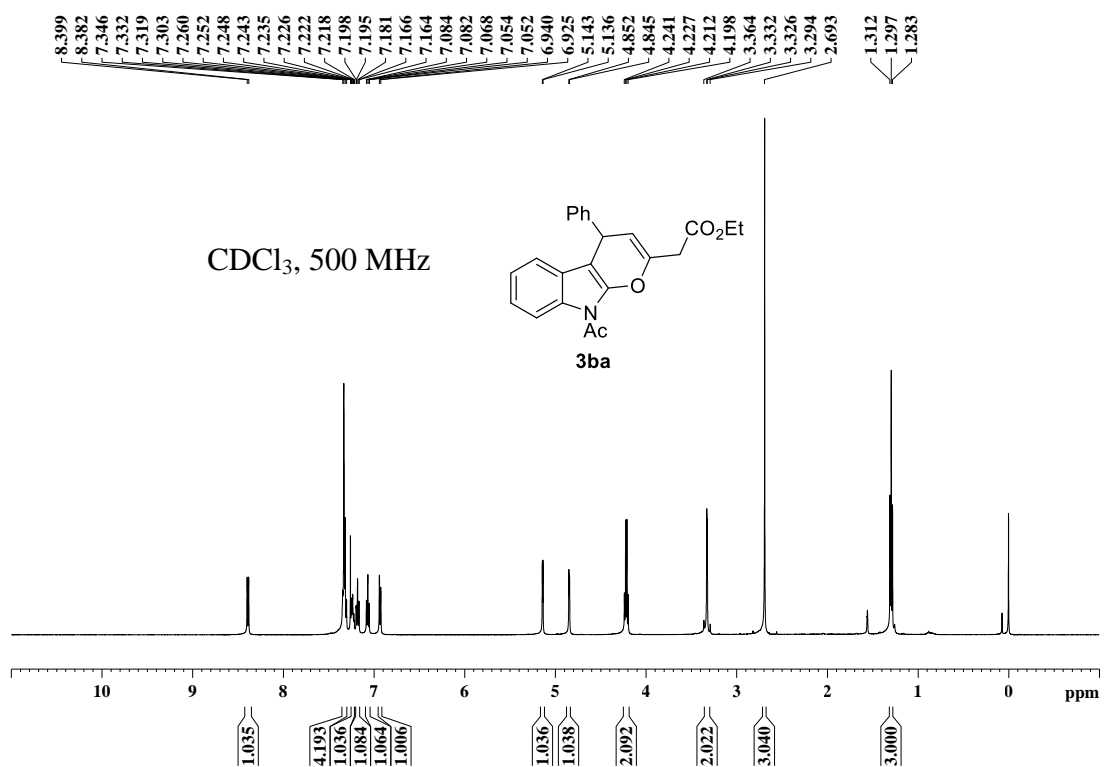

Figure S32:  $^1\text{H}$  NMR spectrum of compound **3ba**

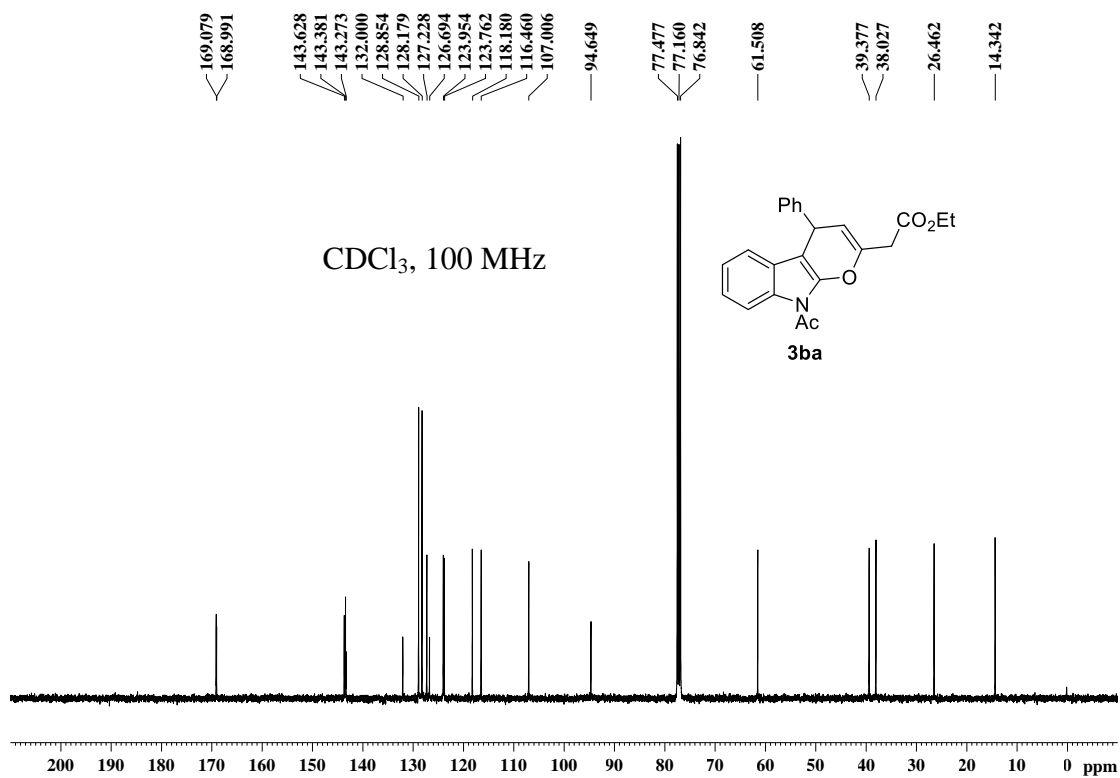

Figure S33:  $^{13}\text{C}$  NMR spectrum of compound **3ba**

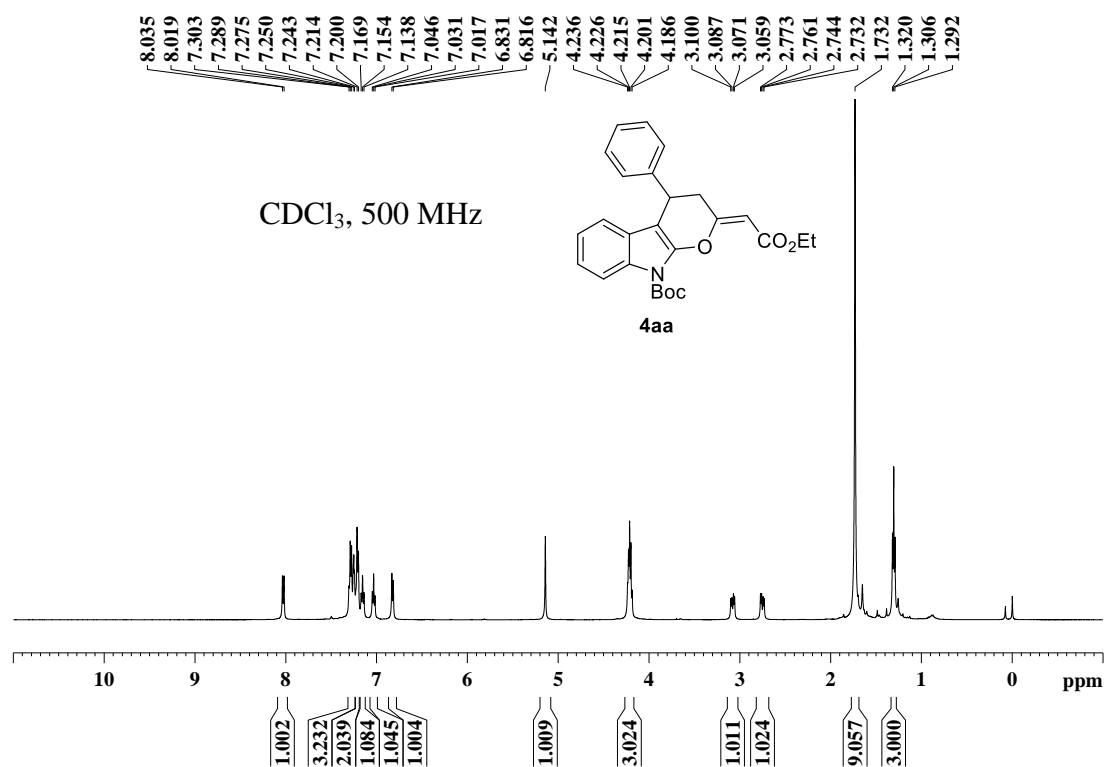

Figure S34:  $^1\text{H}$  NMR spectrum of compound **4aa**

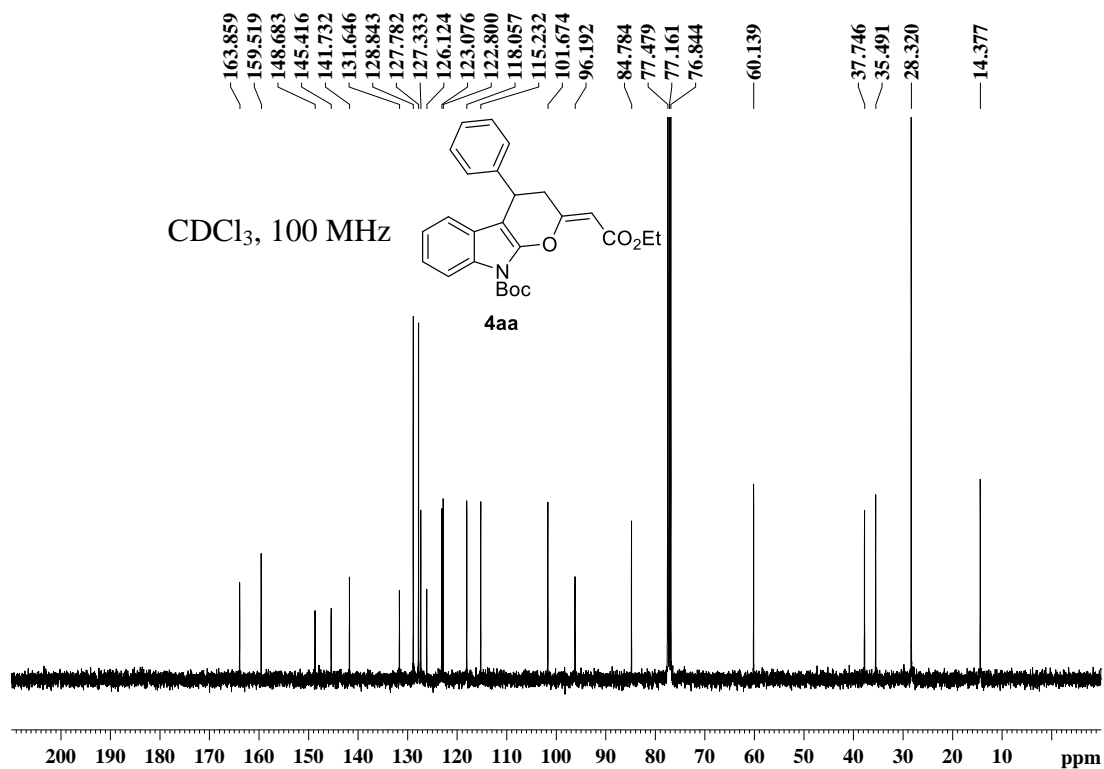

Figure S35: <sup>13</sup>C NMR spectrum of compound **4aa**

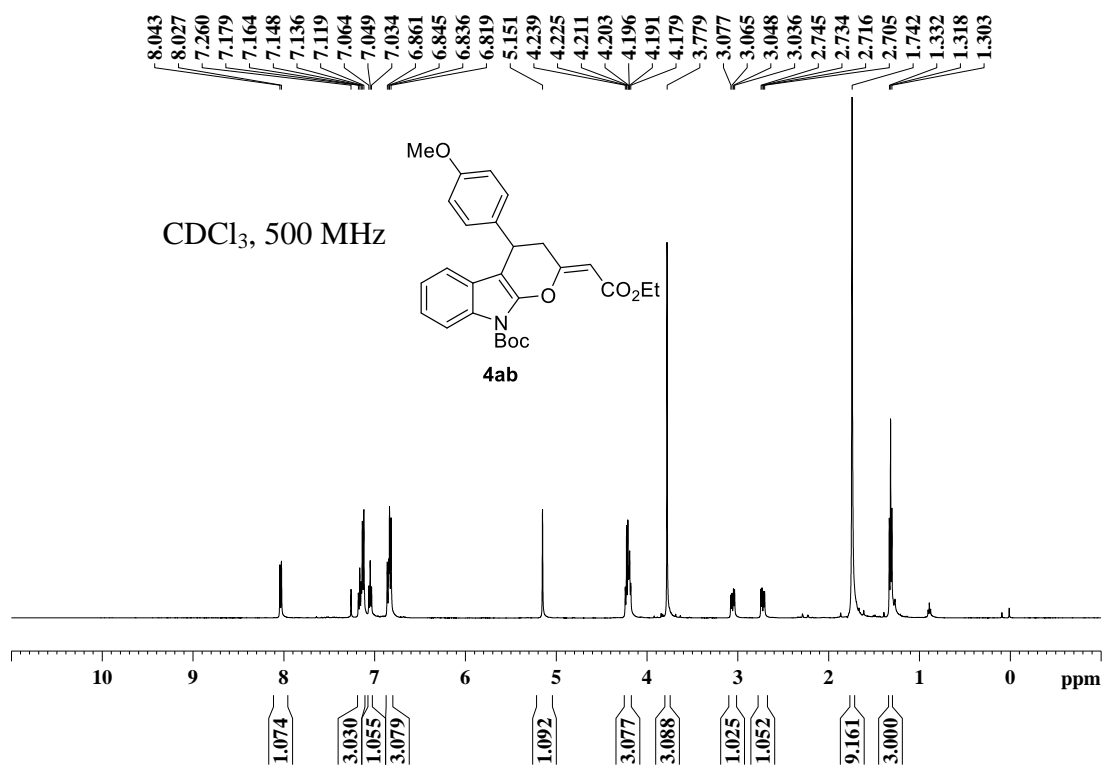

Figure S36: <sup>1</sup>H NMR spectrum of compound **4ab**

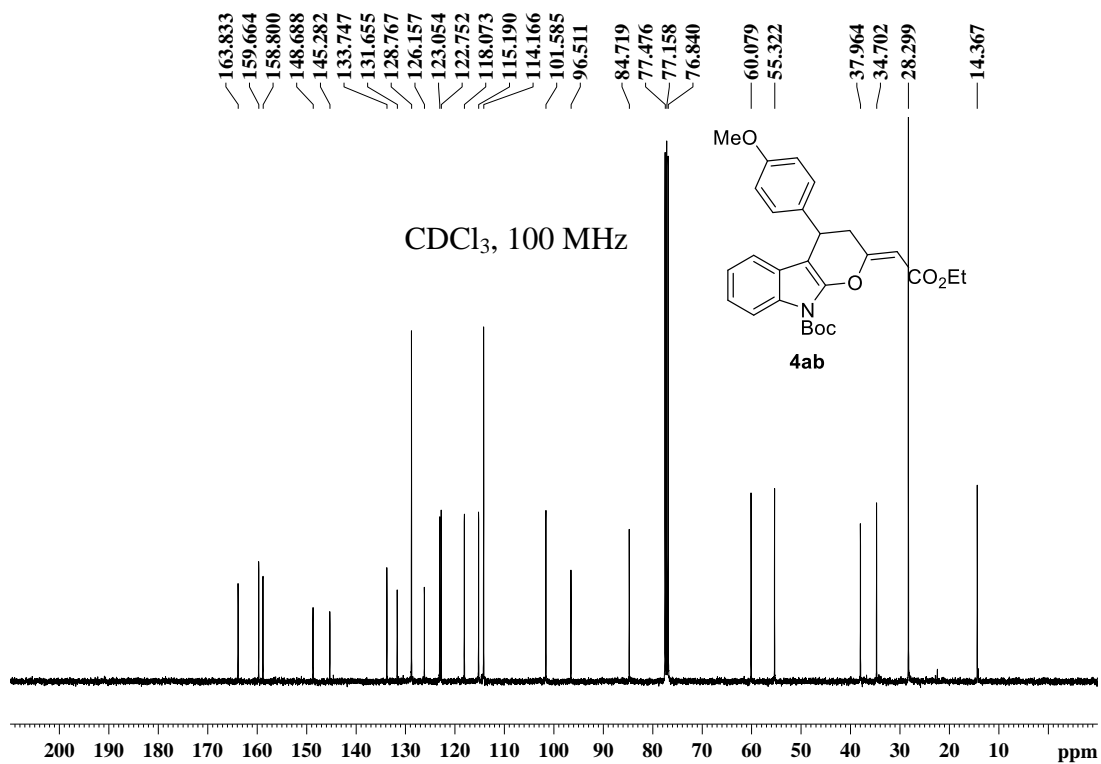

Figure S37:  $^{13}\text{C}$  NMR spectrum of compound **4ab**

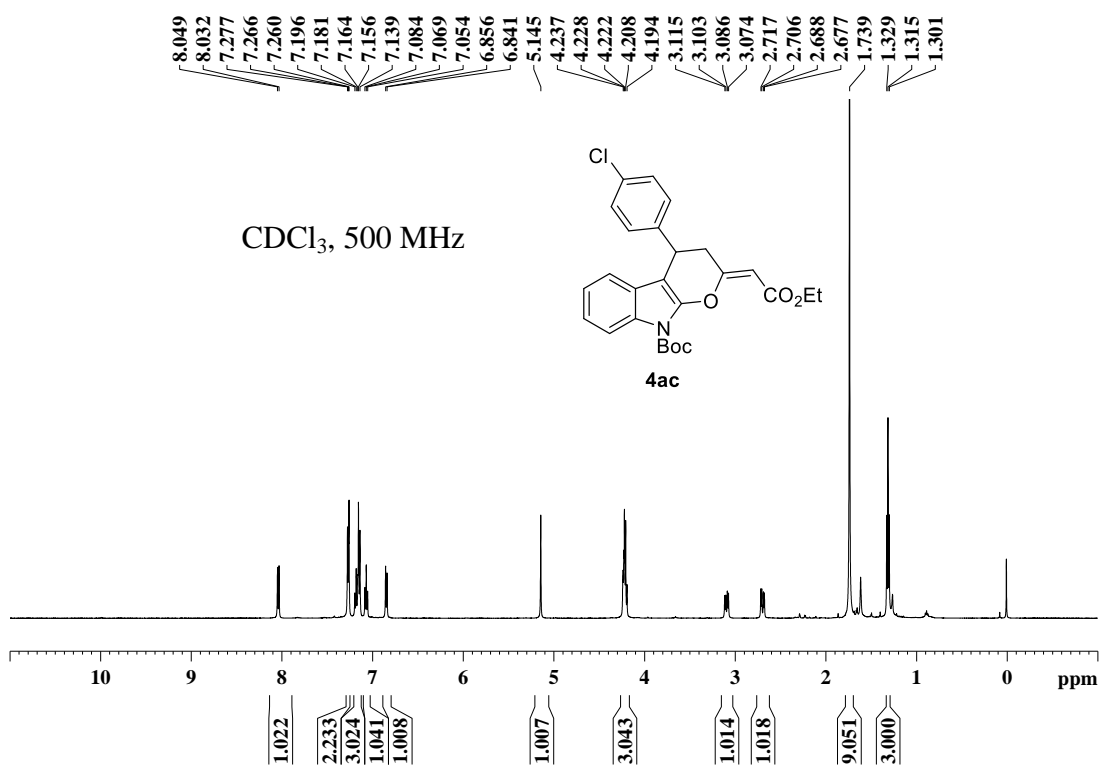

Figure S38:  $^1\text{H}$  NMR spectrum of compound **4ac**

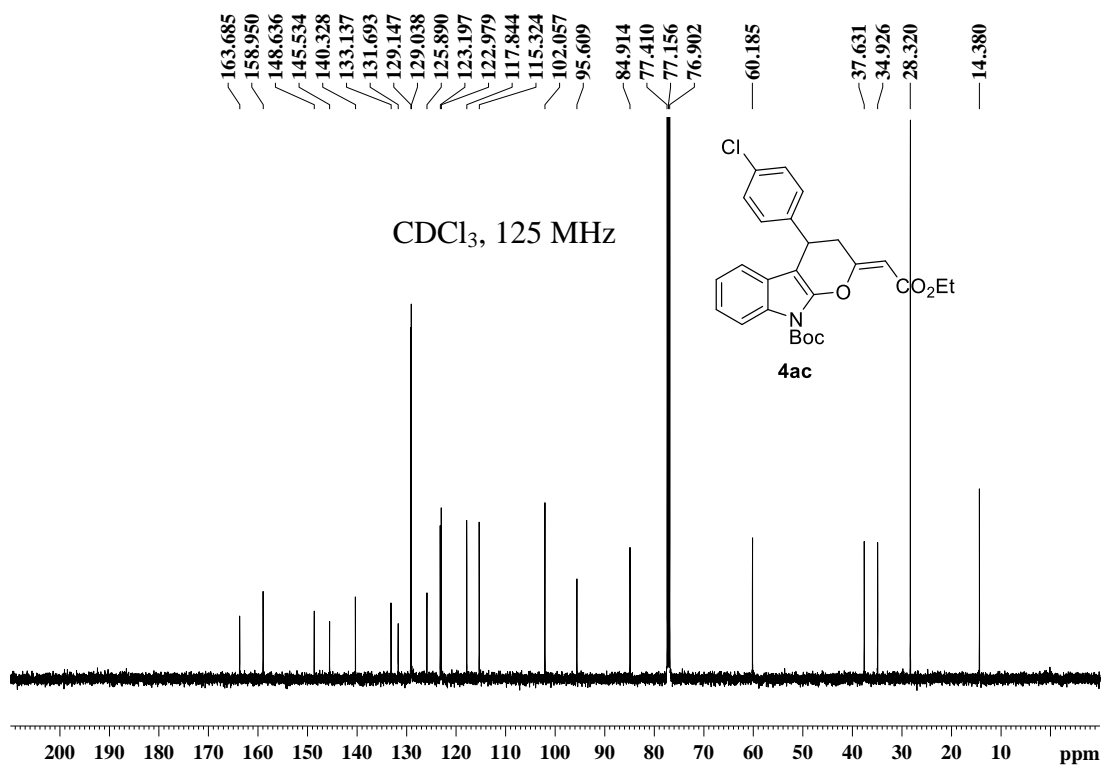

Figure S39:  $^{13}\text{C}$  NMR spectrum of compound **4ac**

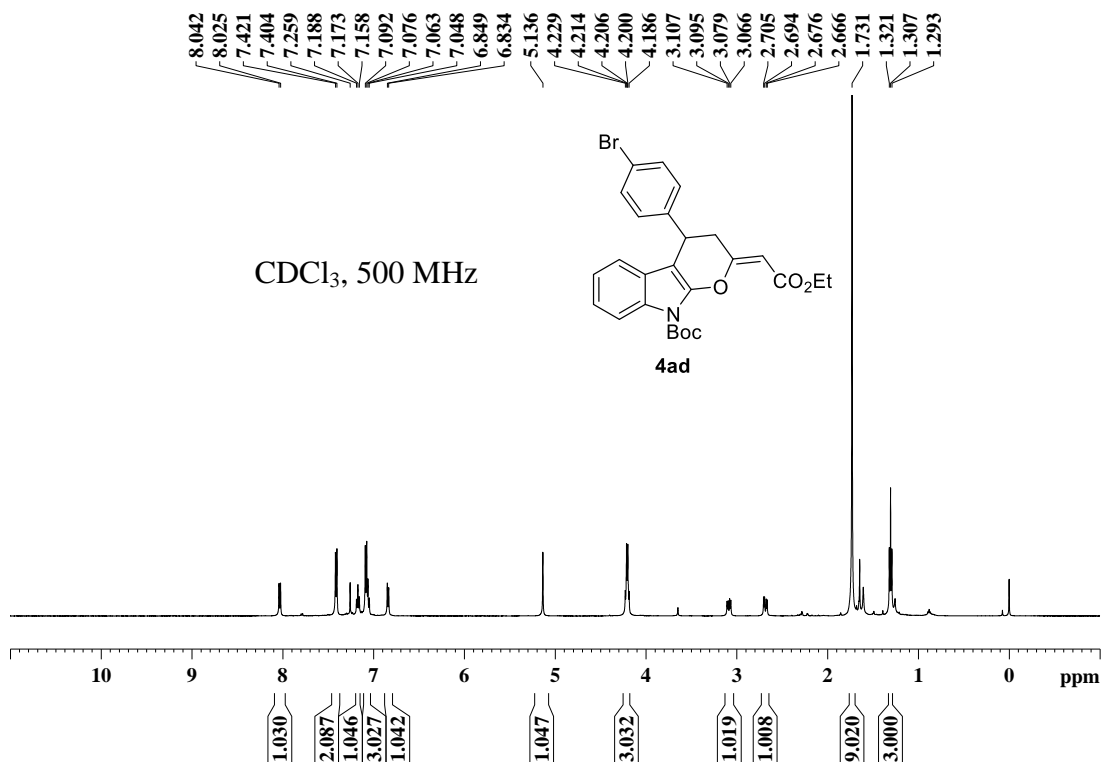

Figure S40:  $^1\text{H}$  NMR spectrum of compound **4ad**

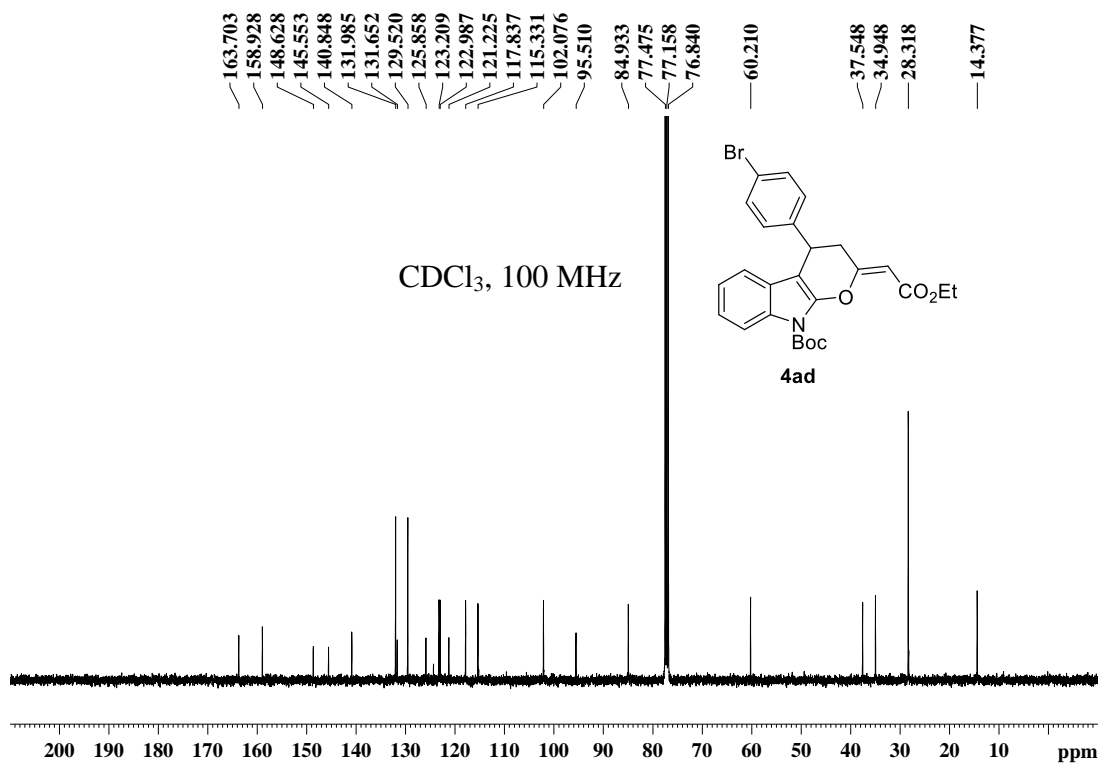

Figure S41: <sup>13</sup>C NMR spectrum of compound **4ad**

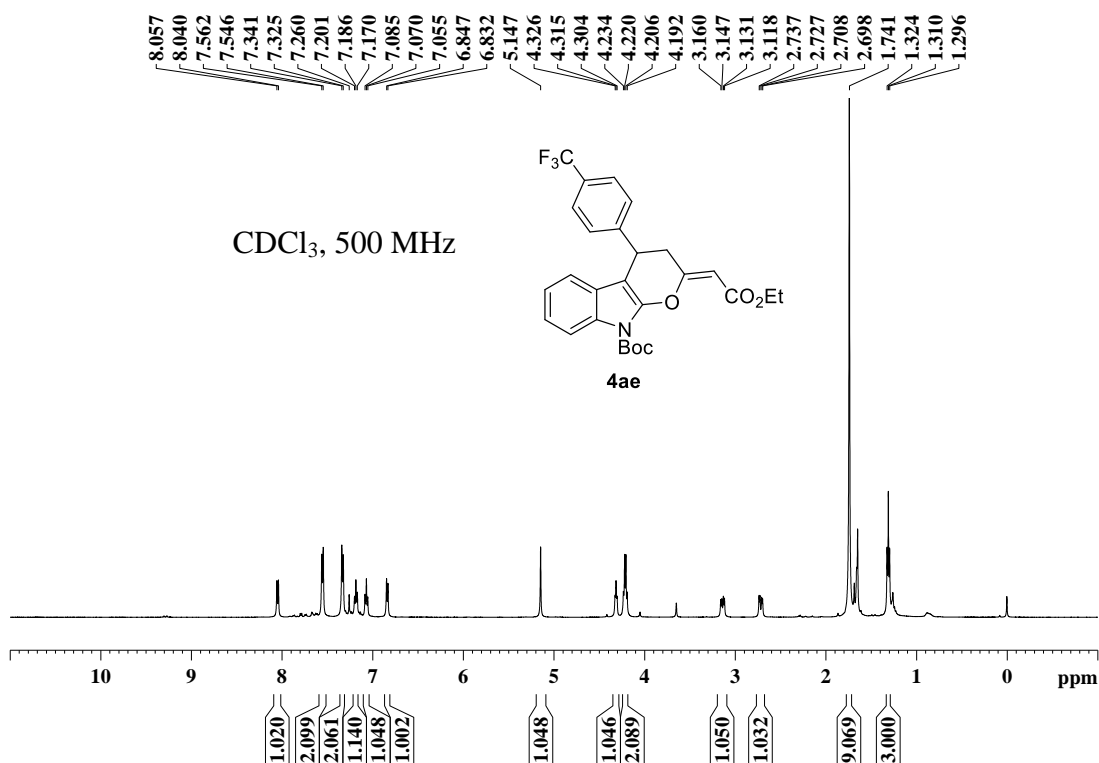

Figure S42: <sup>1</sup>H NMR spectrum of compound **4ae**

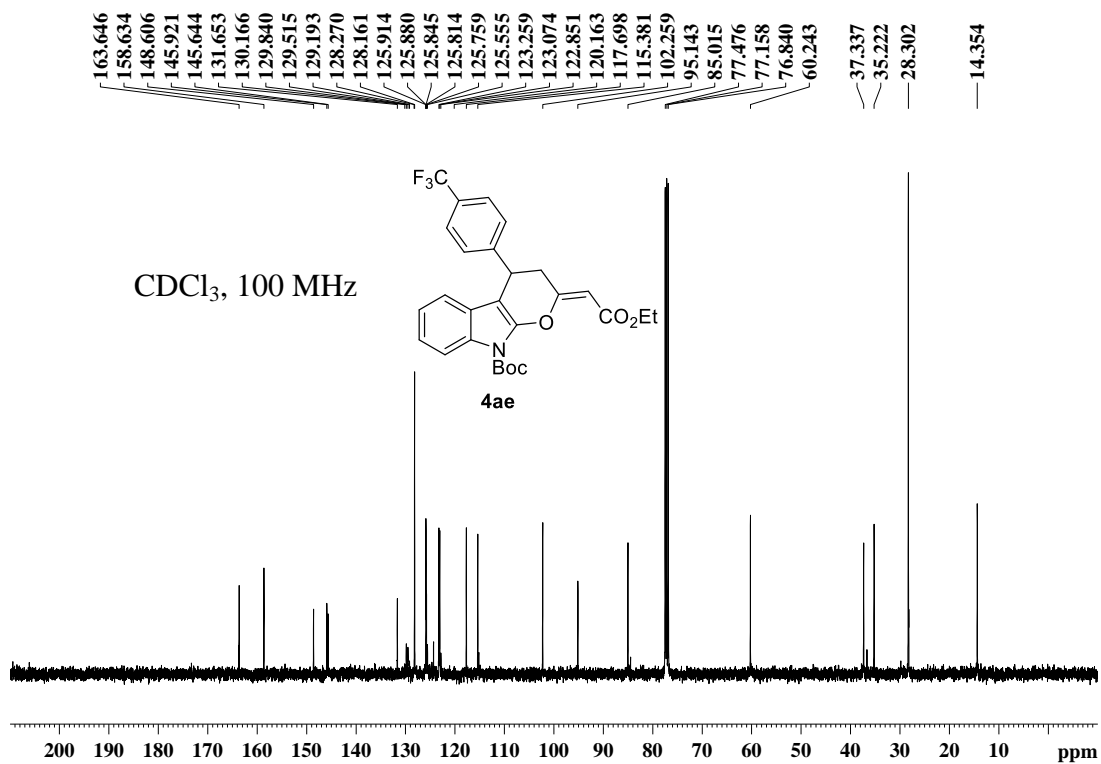

Figure S43: <sup>13</sup>C NMR spectrum of compound **4ae**

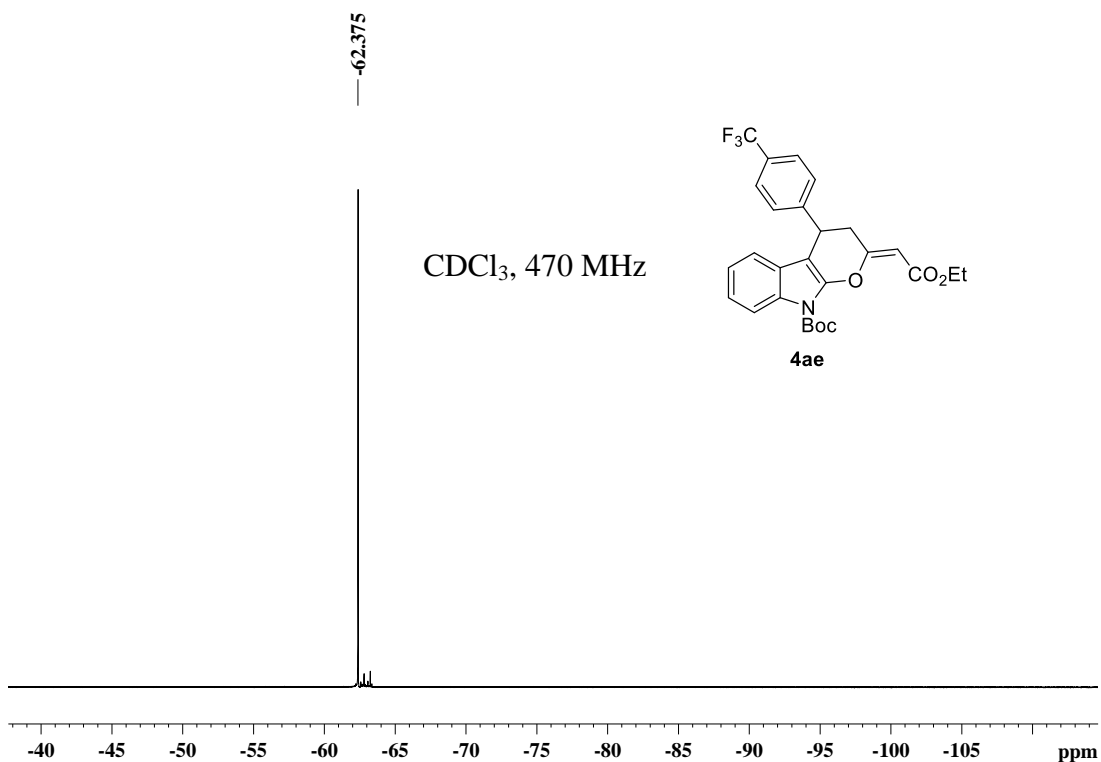

Figure S44: <sup>19</sup>F NMR spectrum of compound **4ae**



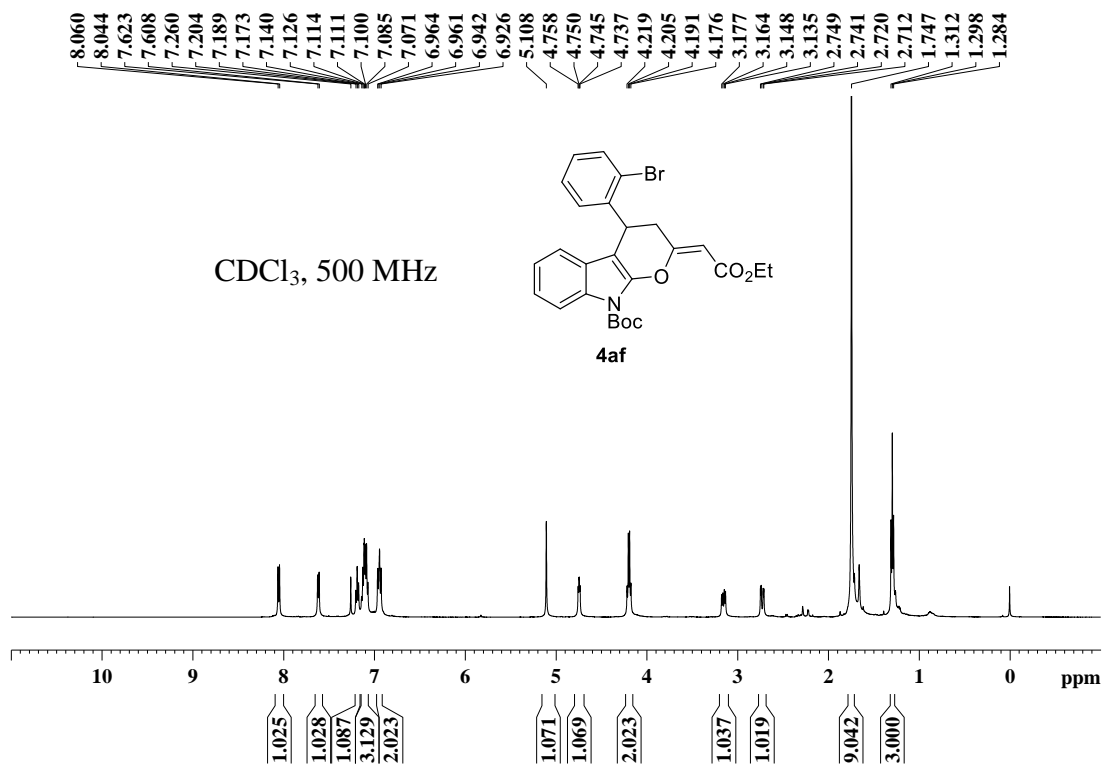

Figure S45: <sup>1</sup>H NMR spectrum of compound **4af**

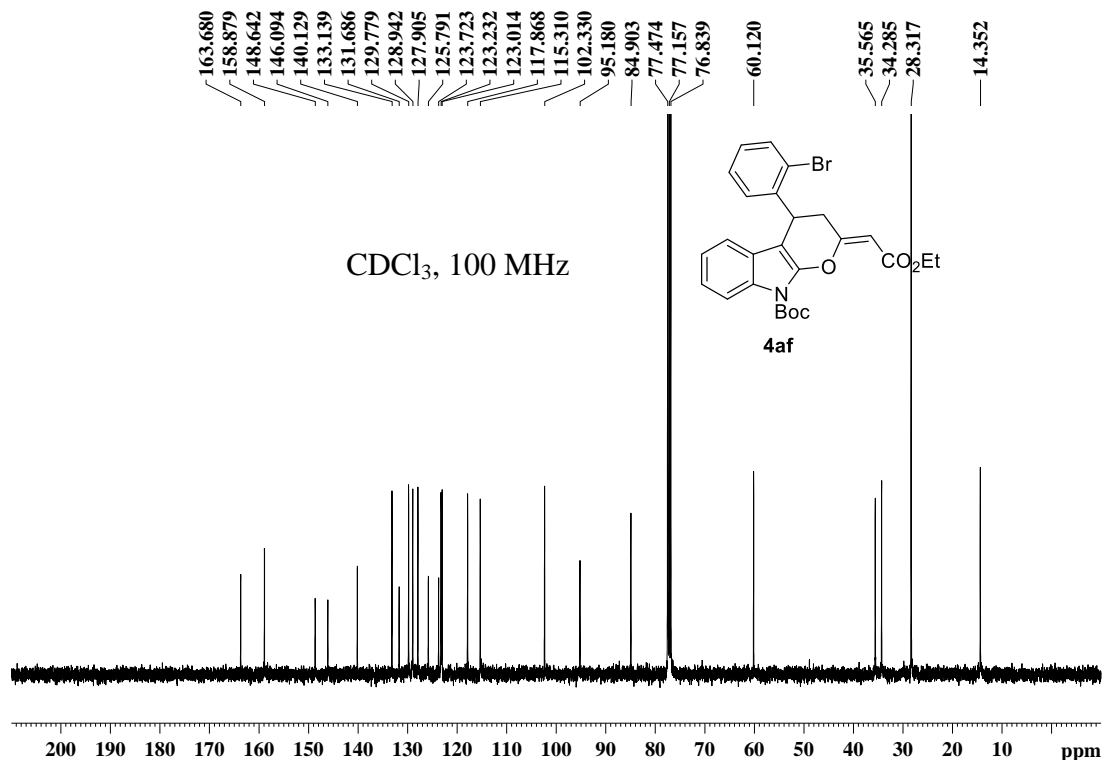

Figure S46: <sup>13</sup>C NMR spectrum of compound **4af**

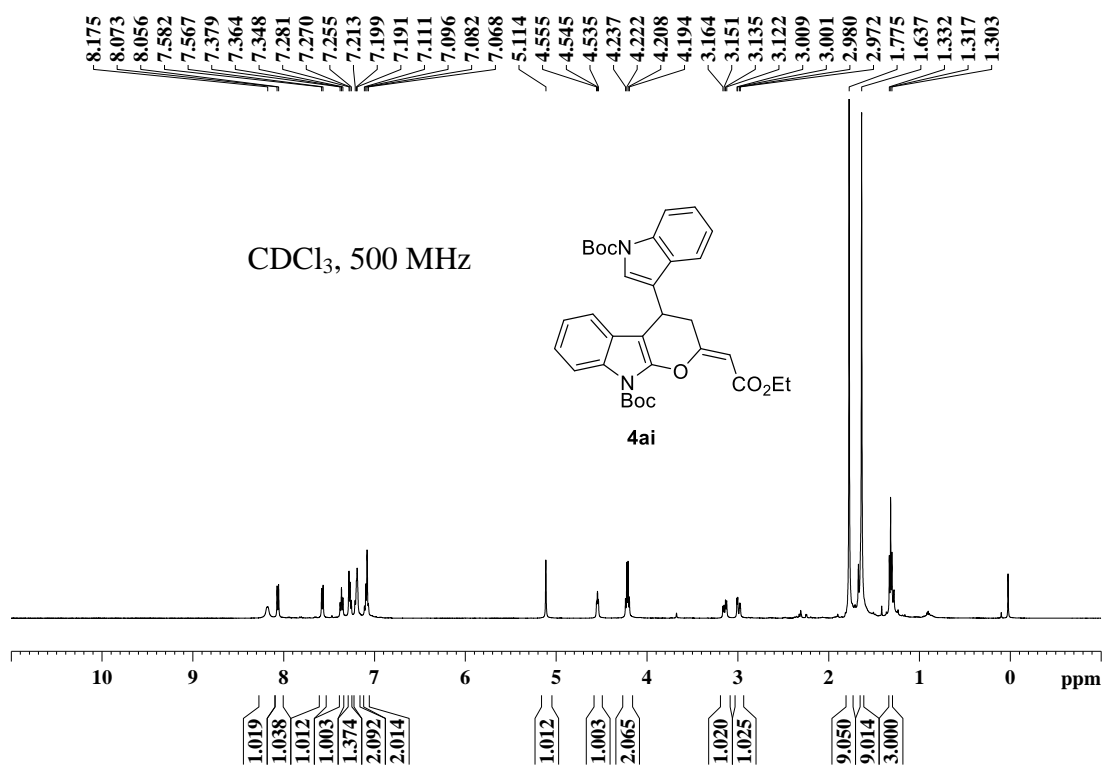

Figure S47: <sup>1</sup>H NMR spectrum of compound **4ai**

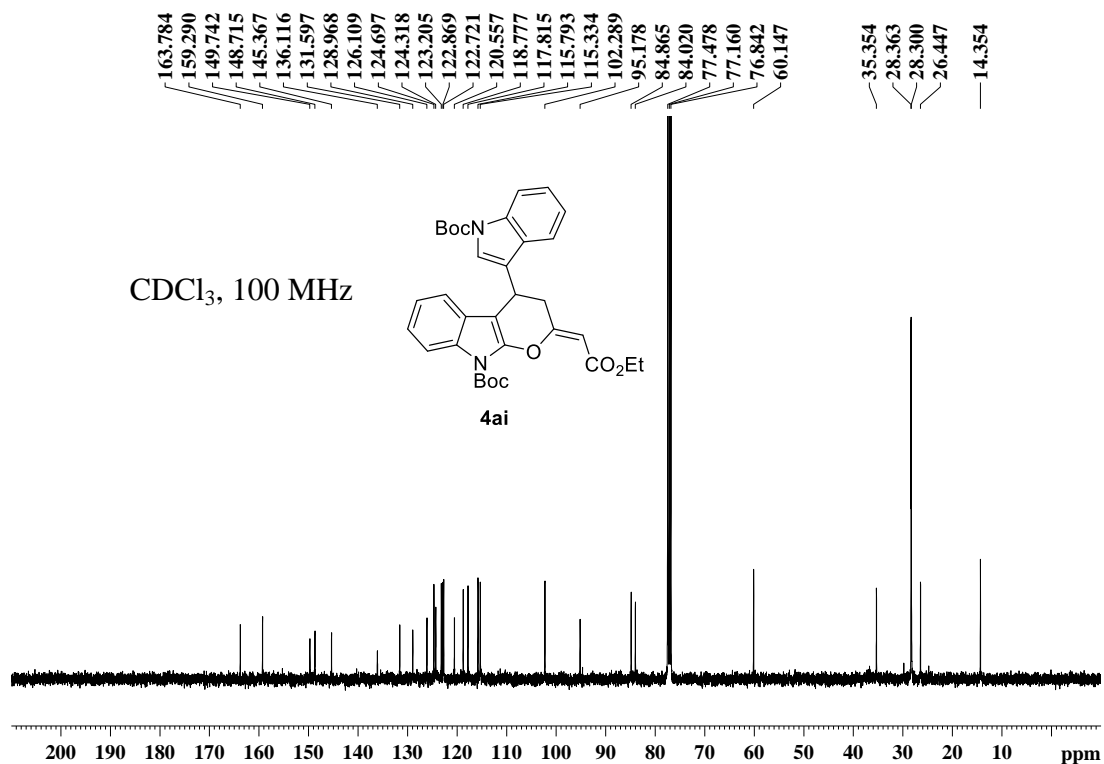

Figure S48: <sup>13</sup>C NMR spectrum of compound **4ai**

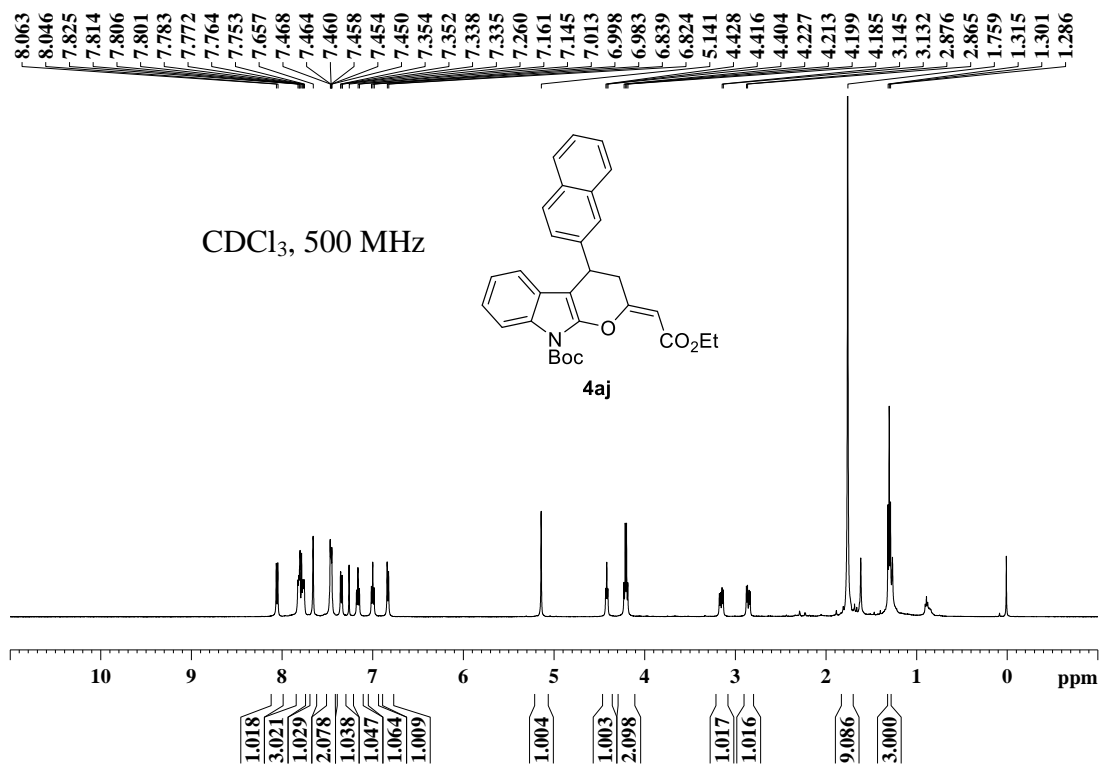

Figure S49: <sup>1</sup>H NMR spectrum of compound **4aj**

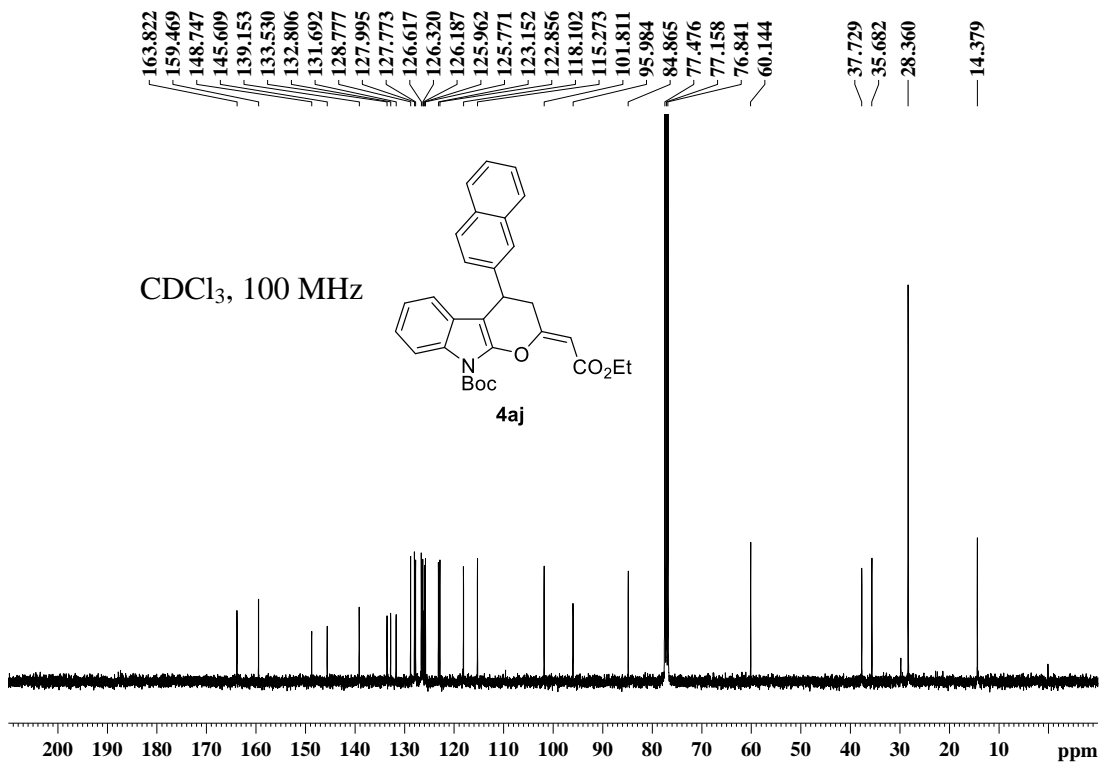

Figure S50: <sup>13</sup>C NMR spectrum of compound **4aj**

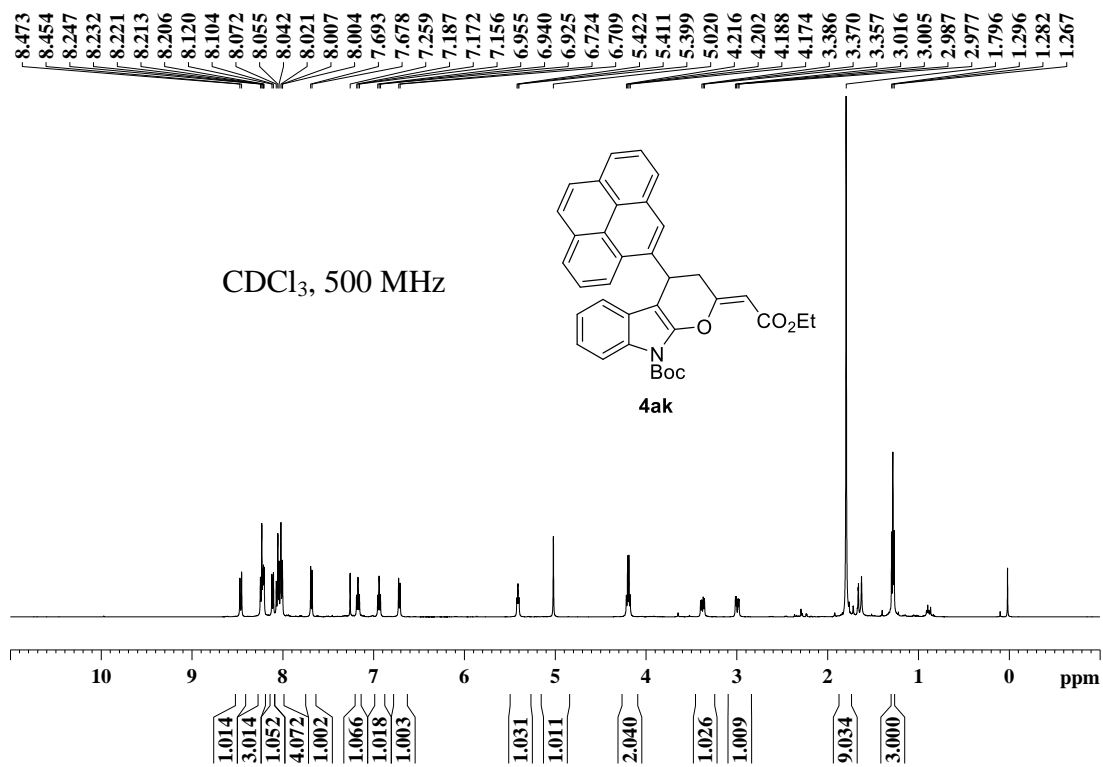

Figure S51:  $^1\text{H}$  NMR spectrum of compound **4ak**

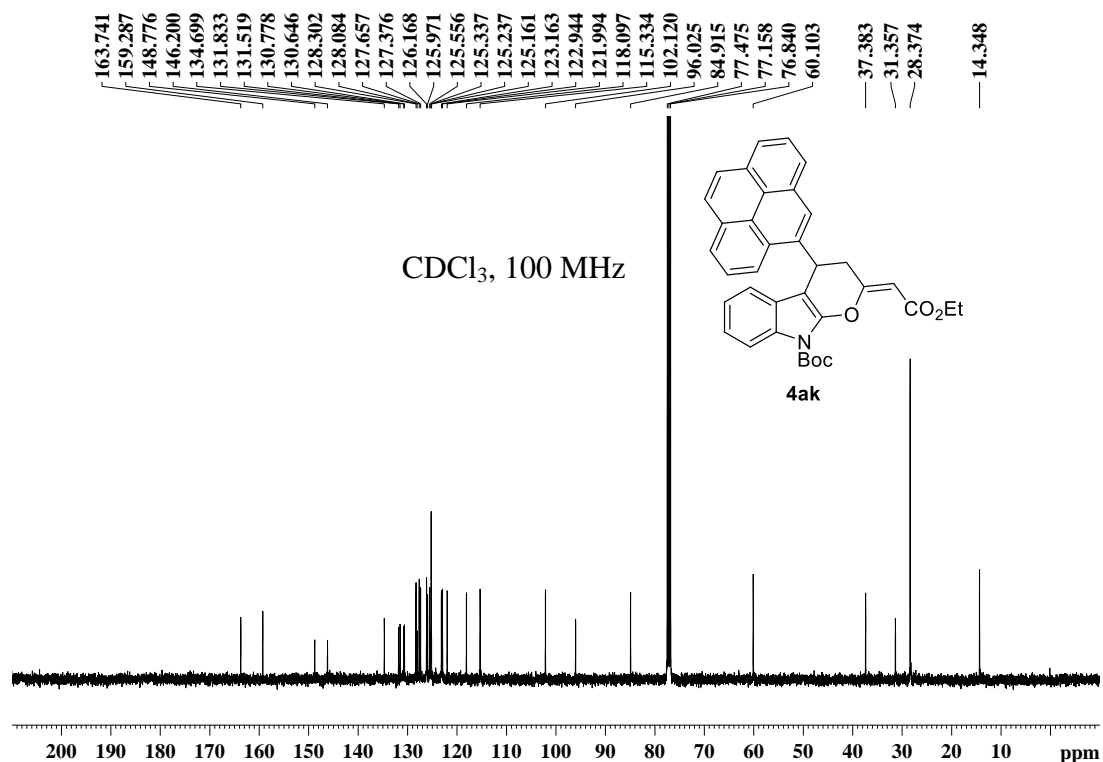

Figure S52:  $^{13}\text{C}$  NMR spectrum of compound **4ak**

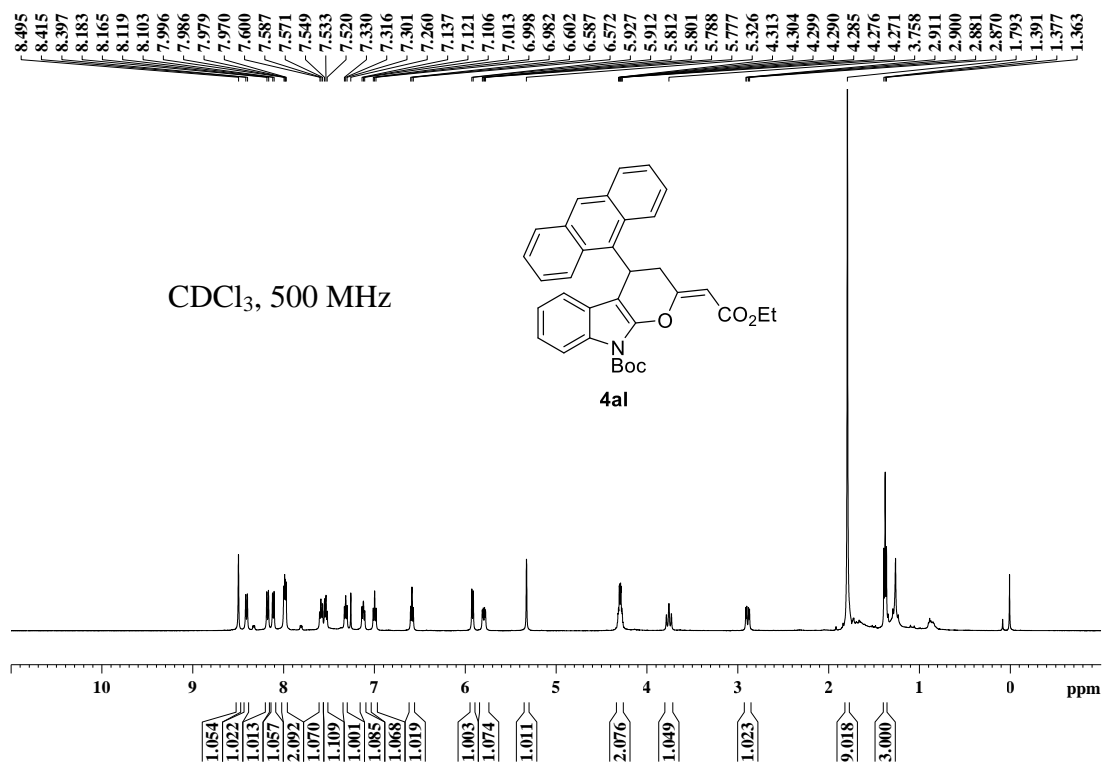

Figure S53:  $^1\text{H}$  NMR spectrum of compound **4al**

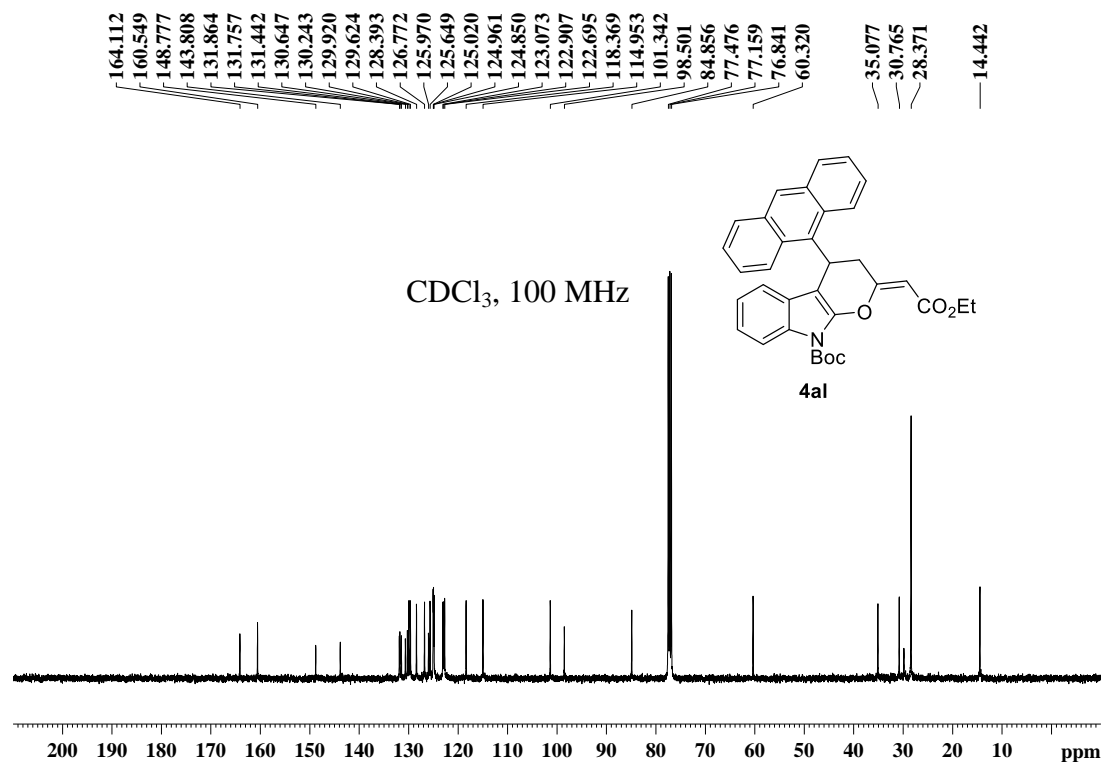

Figure S54:  $^{13}\text{C}$  NMR spectrum of compound **4al**

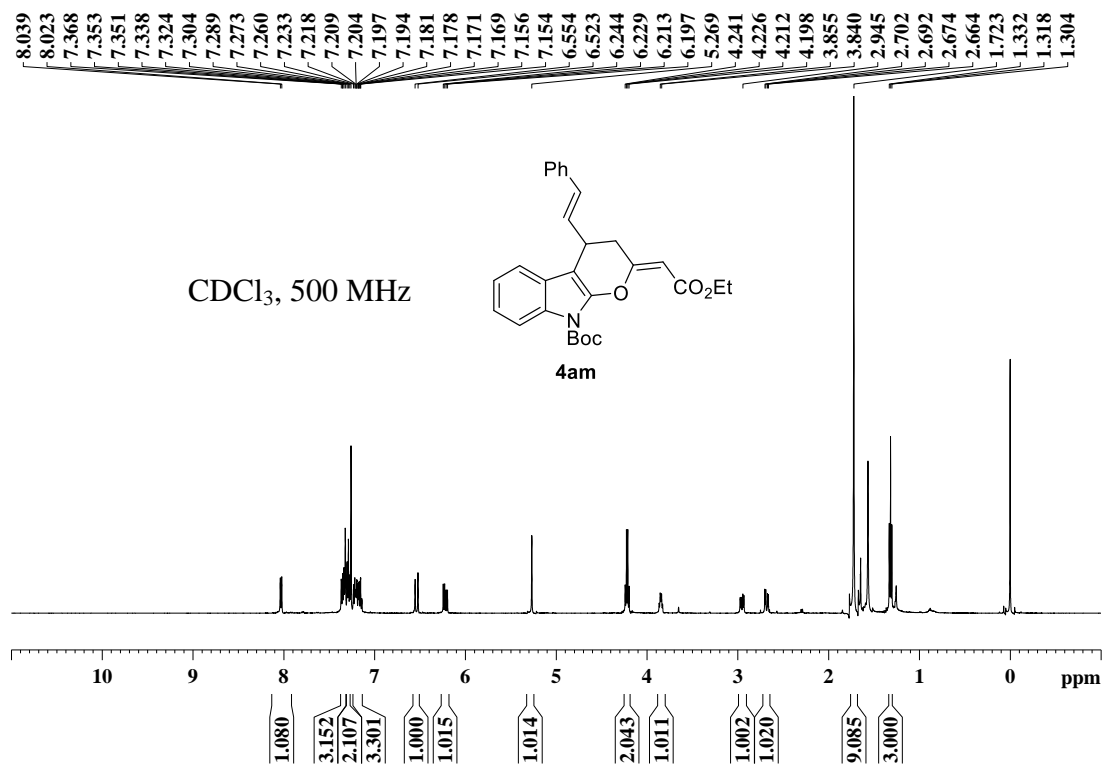

Figure S55: <sup>1</sup>H NMR spectrum of compound **4am**

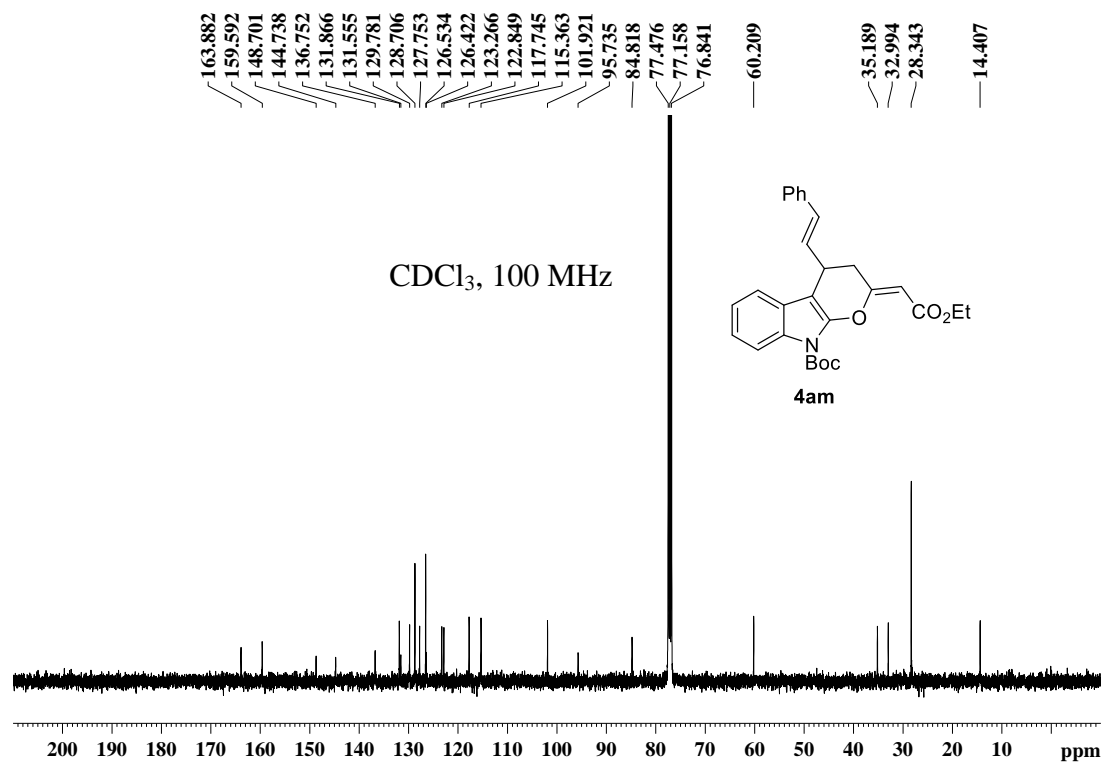

Figure S56: <sup>13</sup>C NMR spectrum of compound **4am**

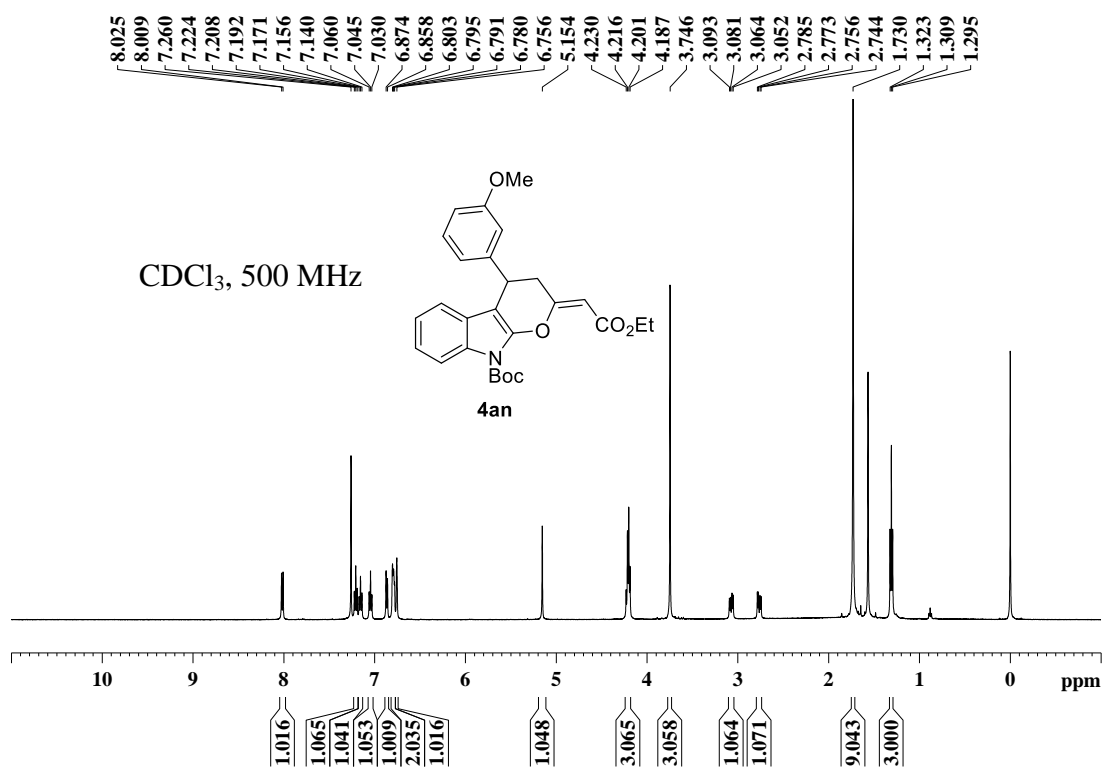

Figure S57: <sup>1</sup>H NMR spectrum of compound **4an**

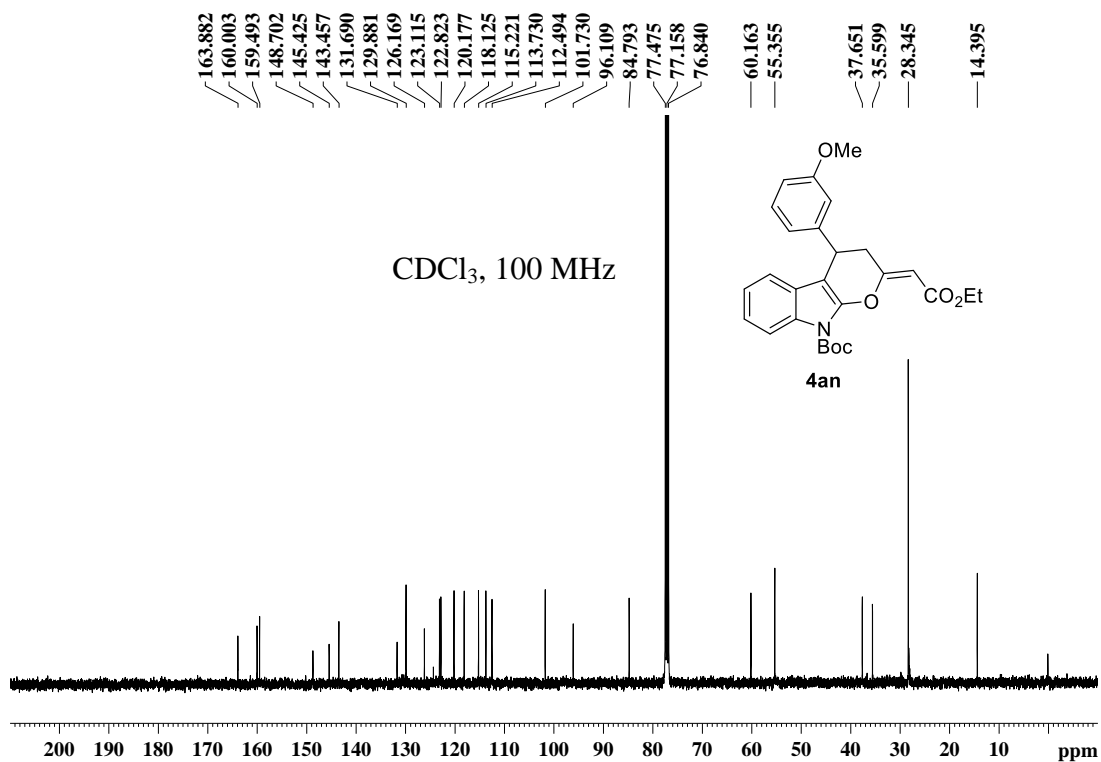

Figure S58: <sup>13</sup>C NMR spectrum of compound **4an**

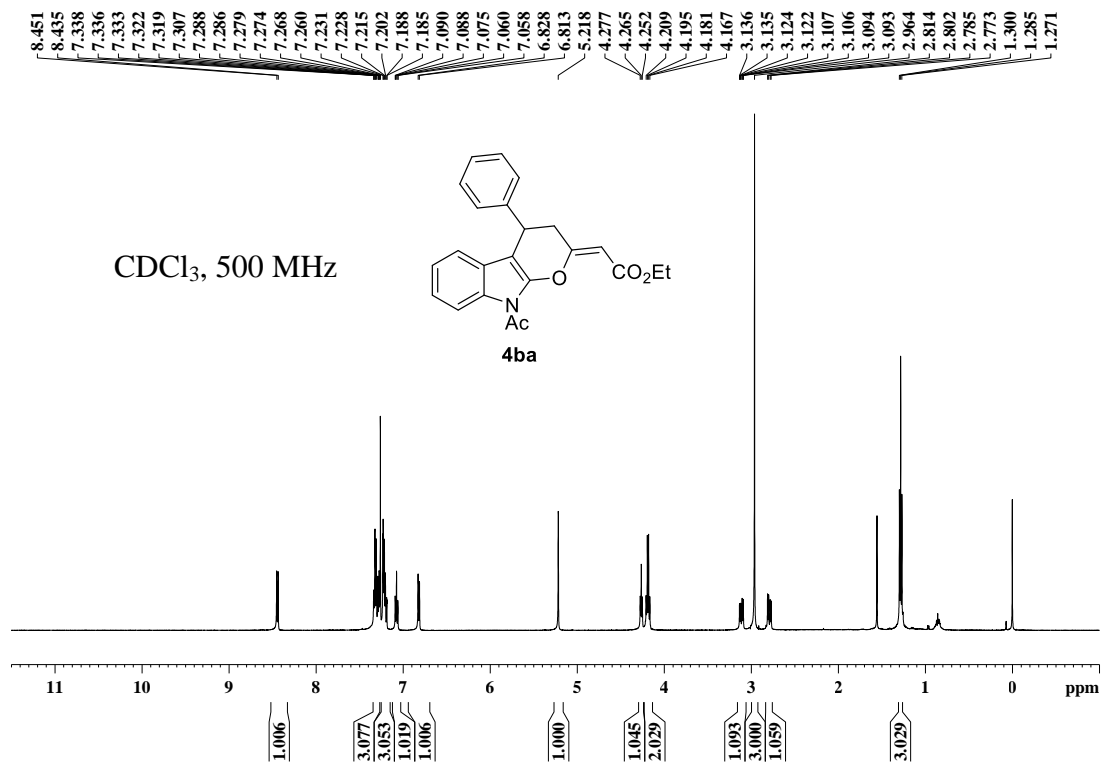

Figure S59:  $^1\text{H NMR}$  spectrum of compound **4ba**

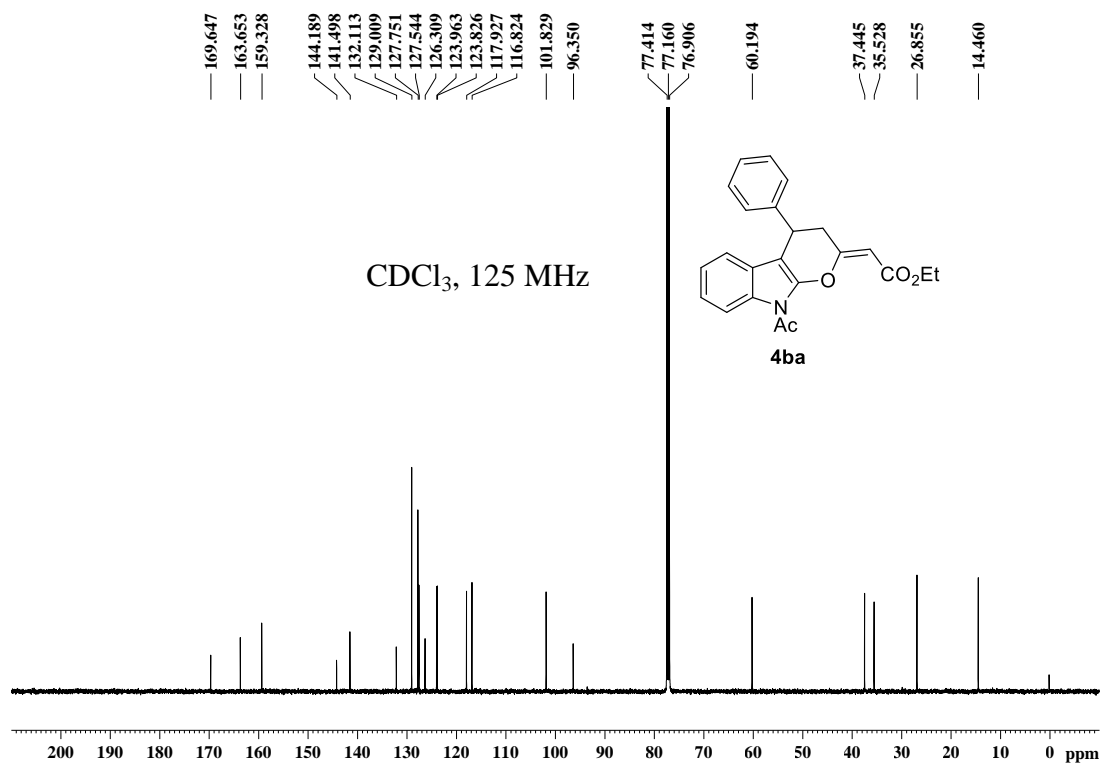

Figure S60:  $^{13}\text{C NMR}$  spectrum of compound **4ba**



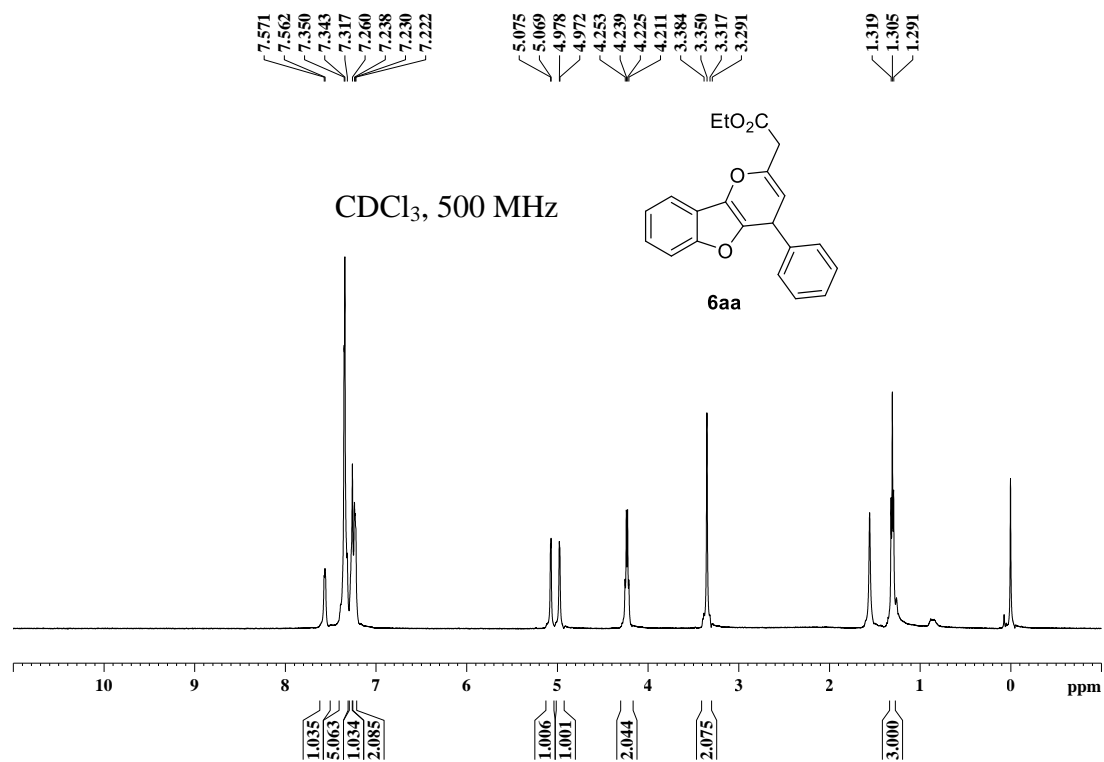

Figure S61: <sup>1</sup>H NMR spectrum of compound **6aa**

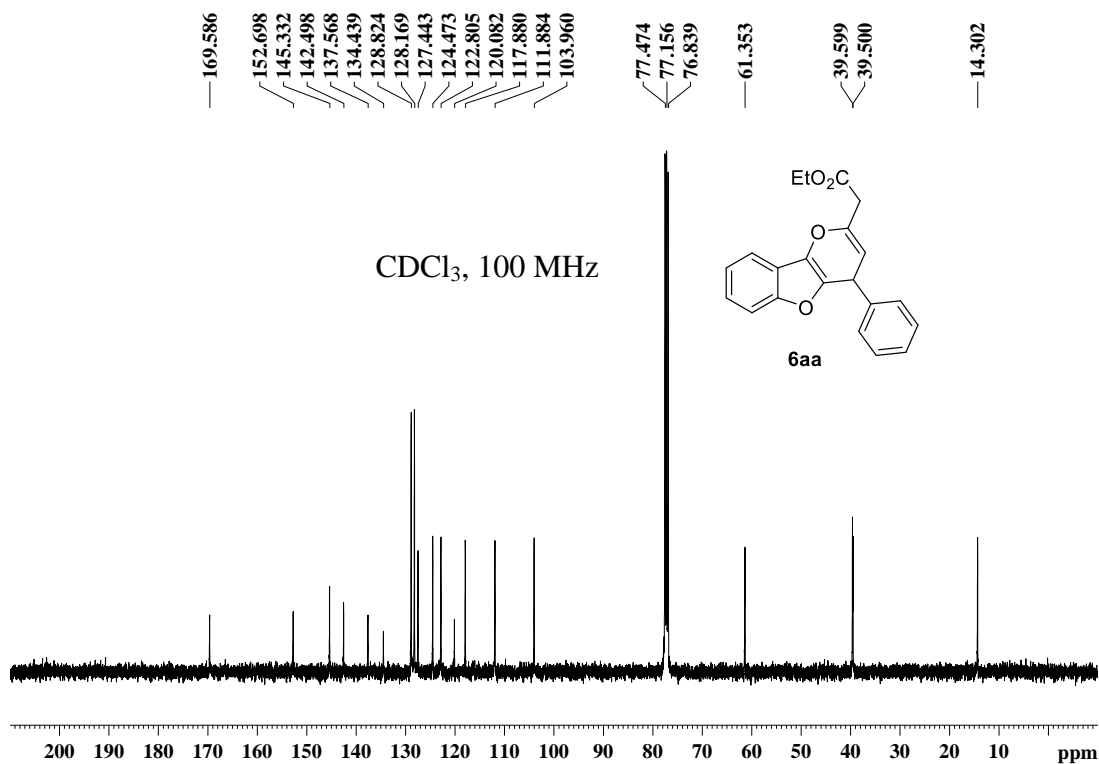

Figure S62: <sup>13</sup>C NMR spectrum of compound **6aa**

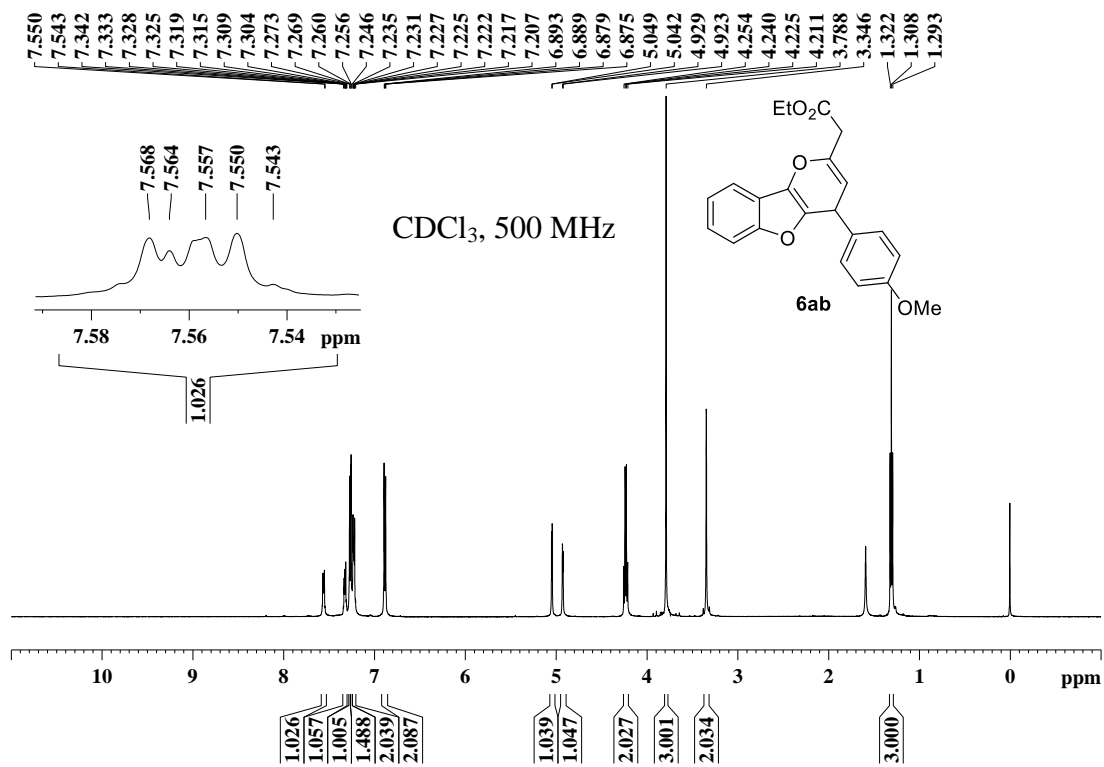

Figure S63:  $^1\text{H NMR}$  spectrum of compound **6ab**

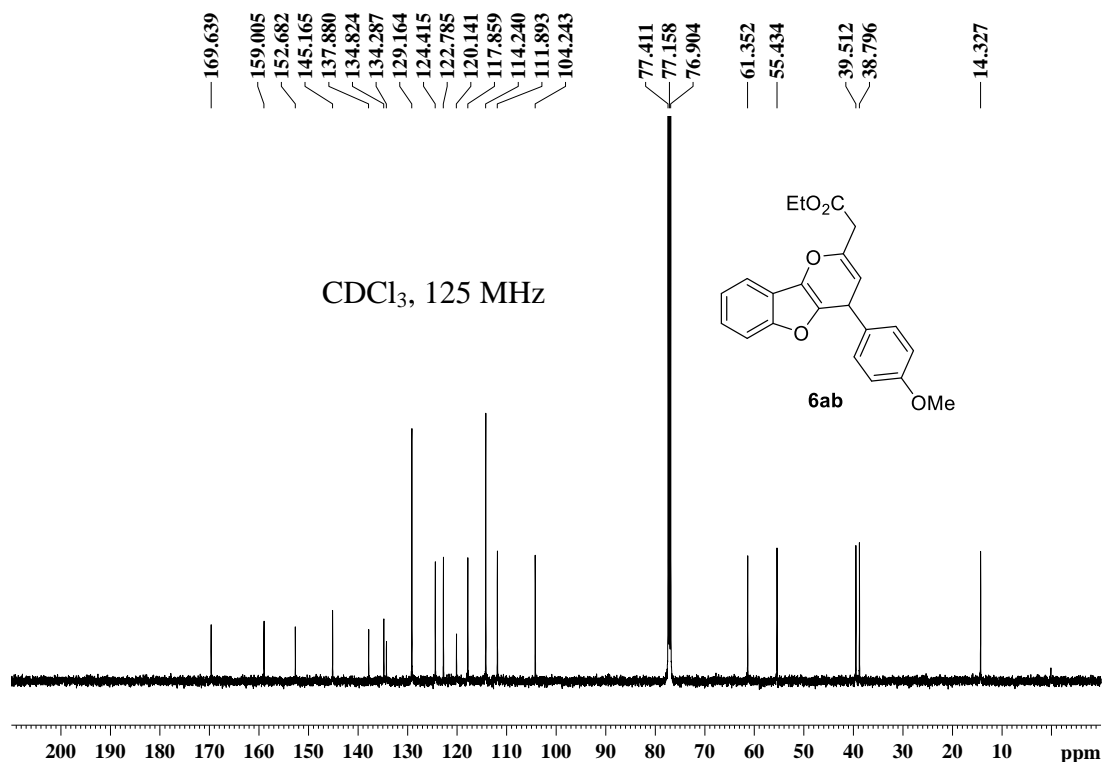

Figure S64:  $^{13}\text{C NMR}$  spectrum of compound **6ab**

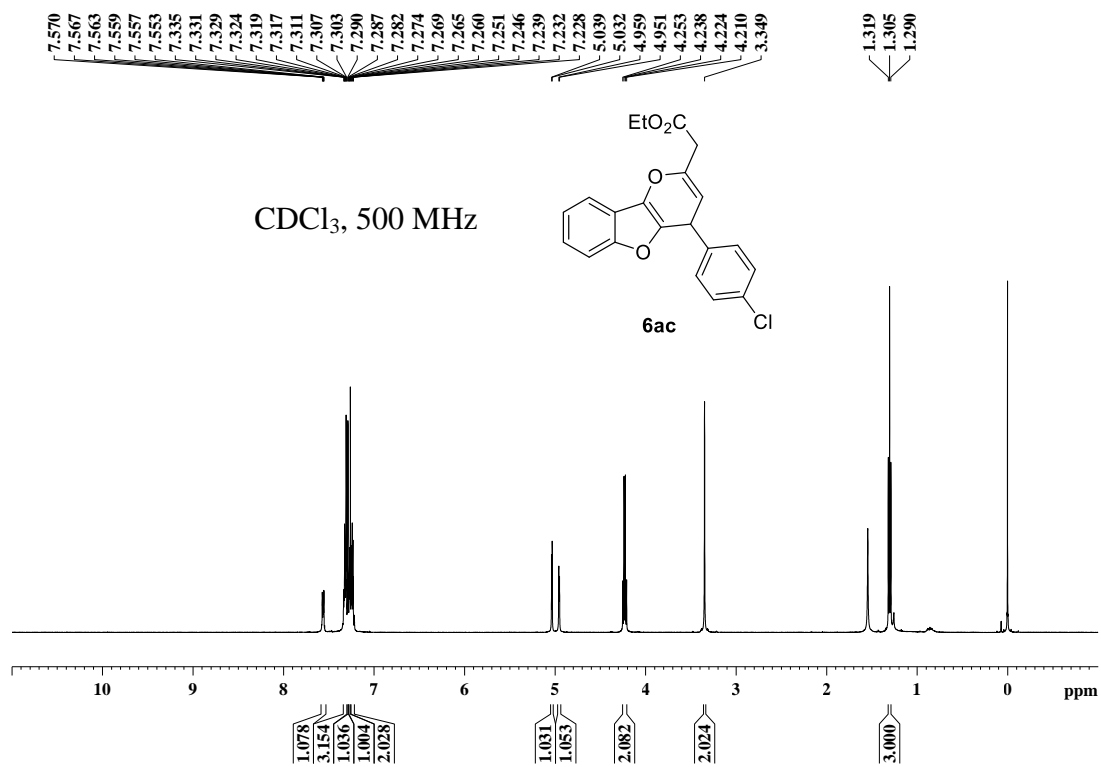

Figure S65: <sup>1</sup>H NMR spectrum of compound **6ac**

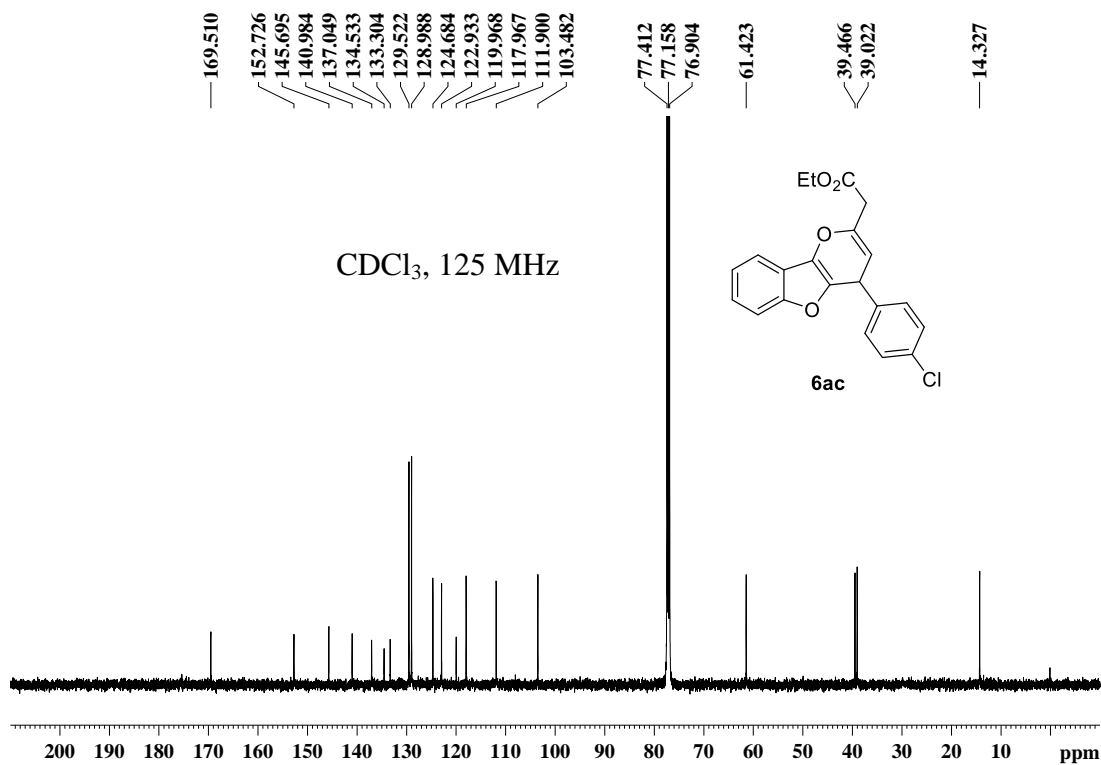

Figure S66: <sup>13</sup>C NMR spectrum of compound **6ac**

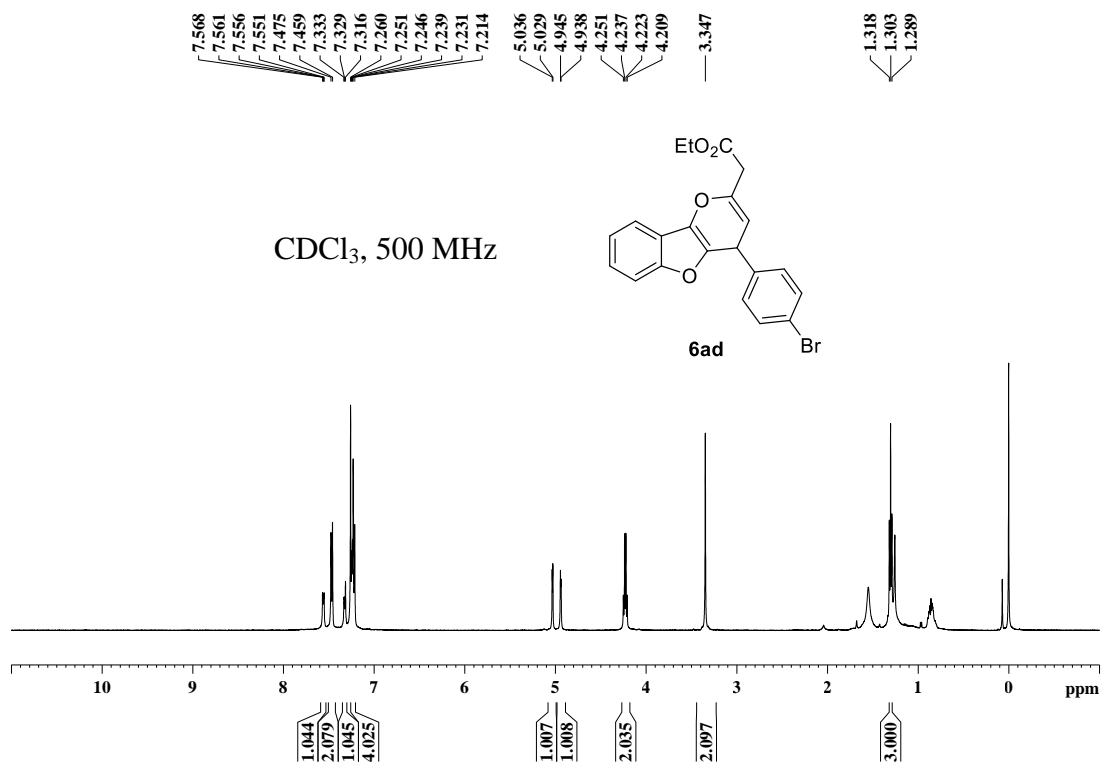

Figure S67: <sup>1</sup>H NMR spectrum of compound **6ad**

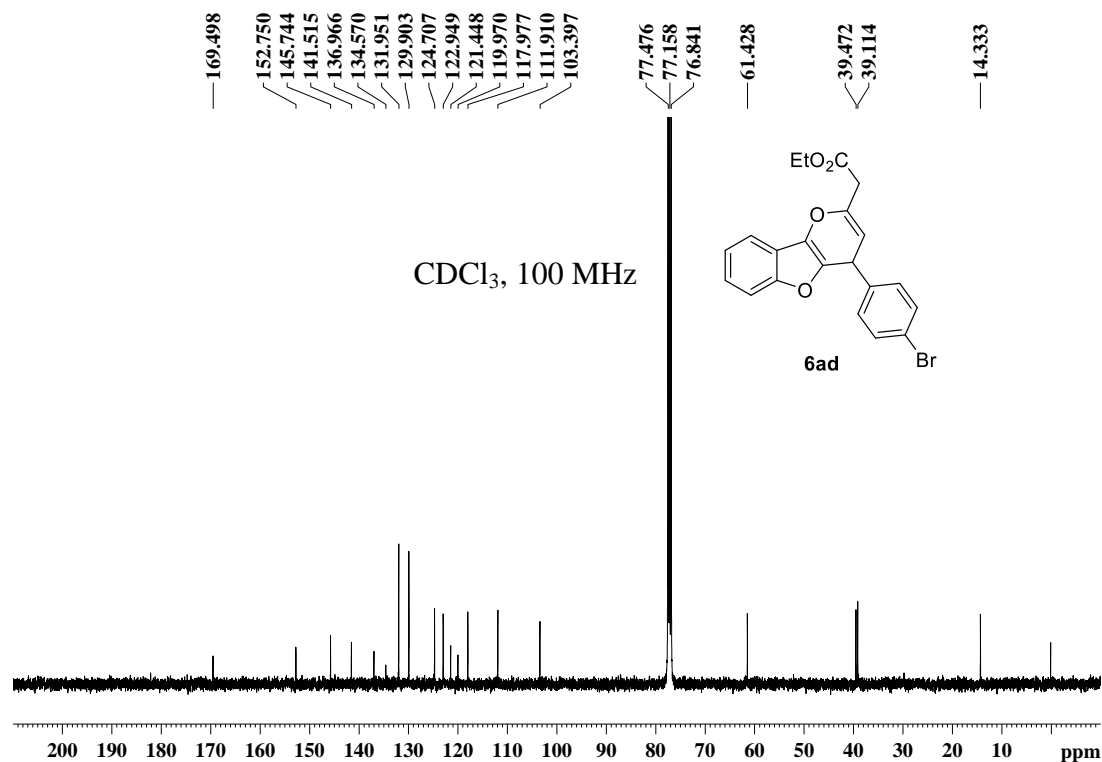

Figure S68: <sup>13</sup>C NMR spectrum of compound **6ad**

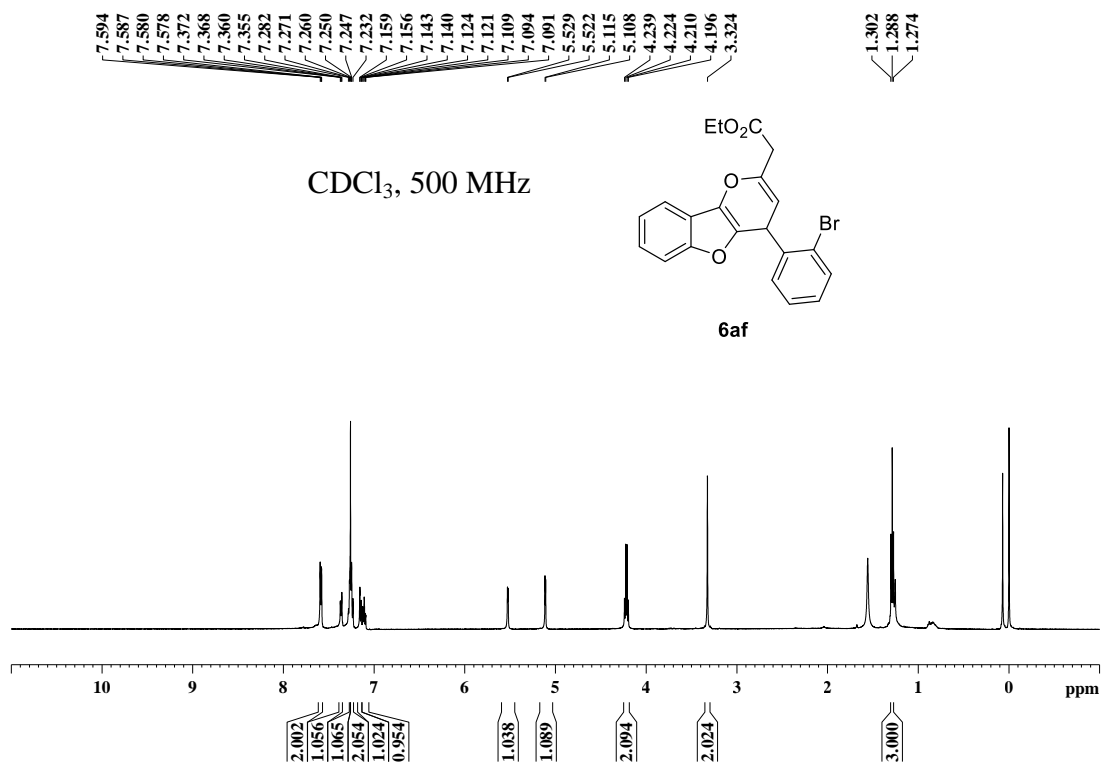

Figure S69: <sup>1</sup>H NMR spectrum of compound **6af**

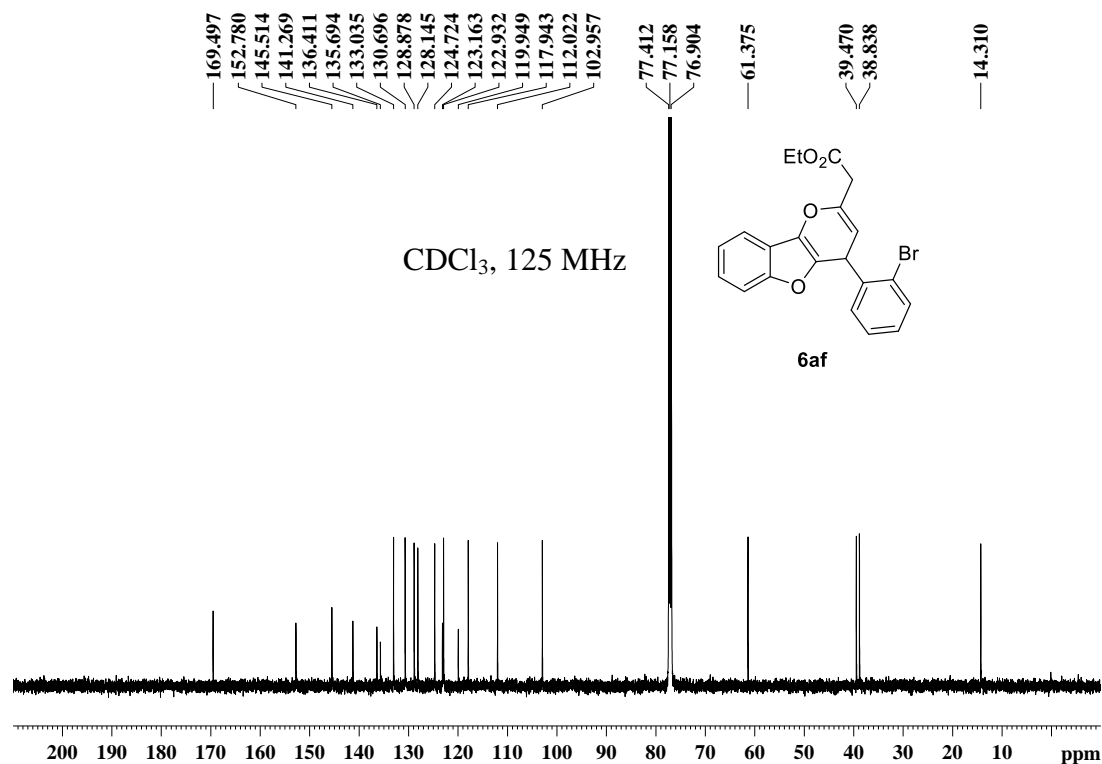

Figure S70: <sup>13</sup>C NMR spectrum of compound **6af**

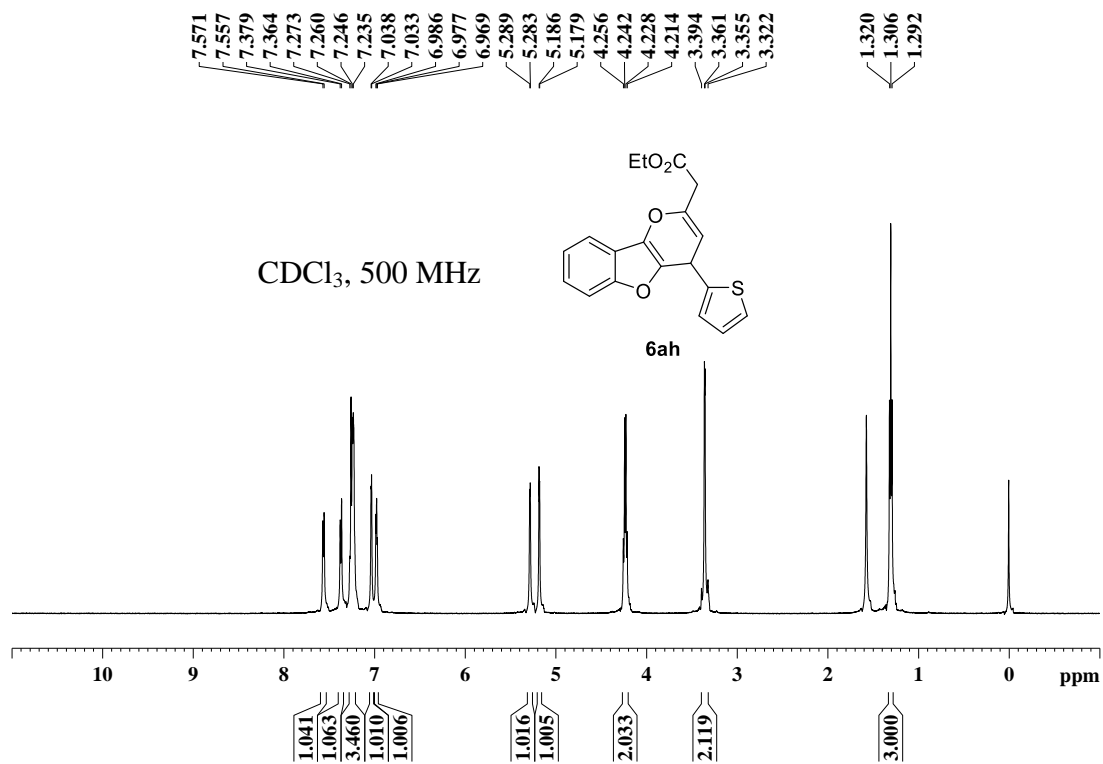

Figure S71: <sup>1</sup>H NMR spectrum of compound **6ah**

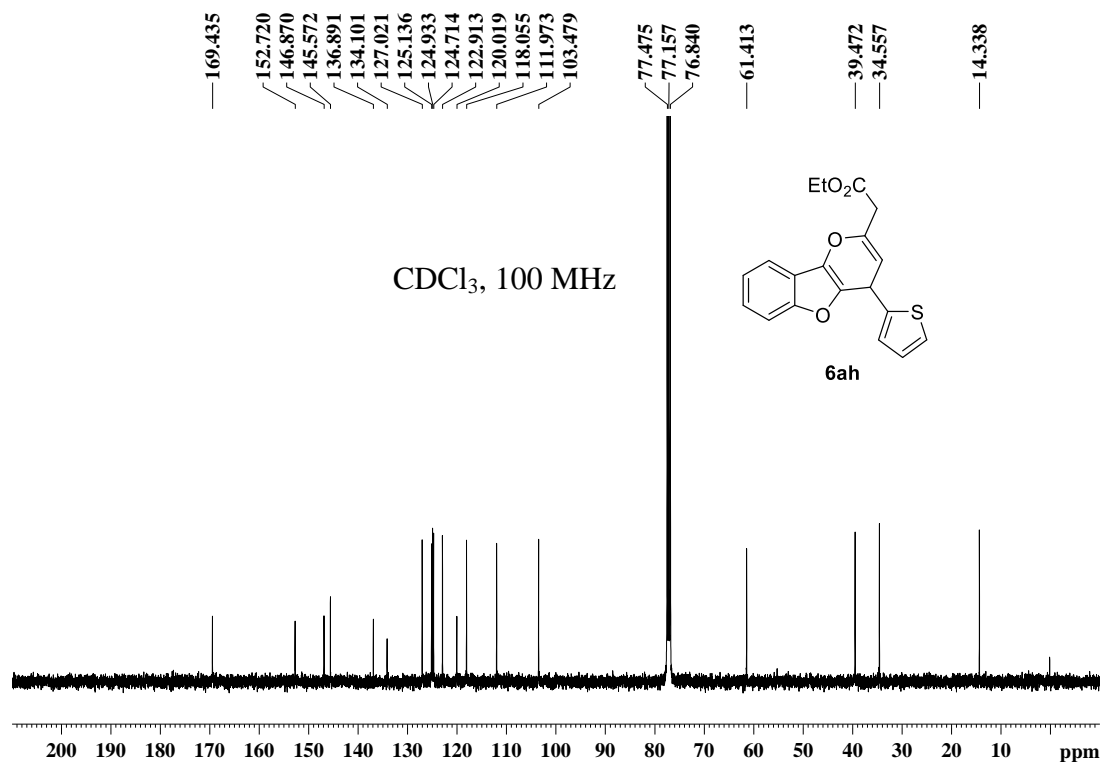

Figure S72: <sup>13</sup>C NMR spectrum of compound **6ah**

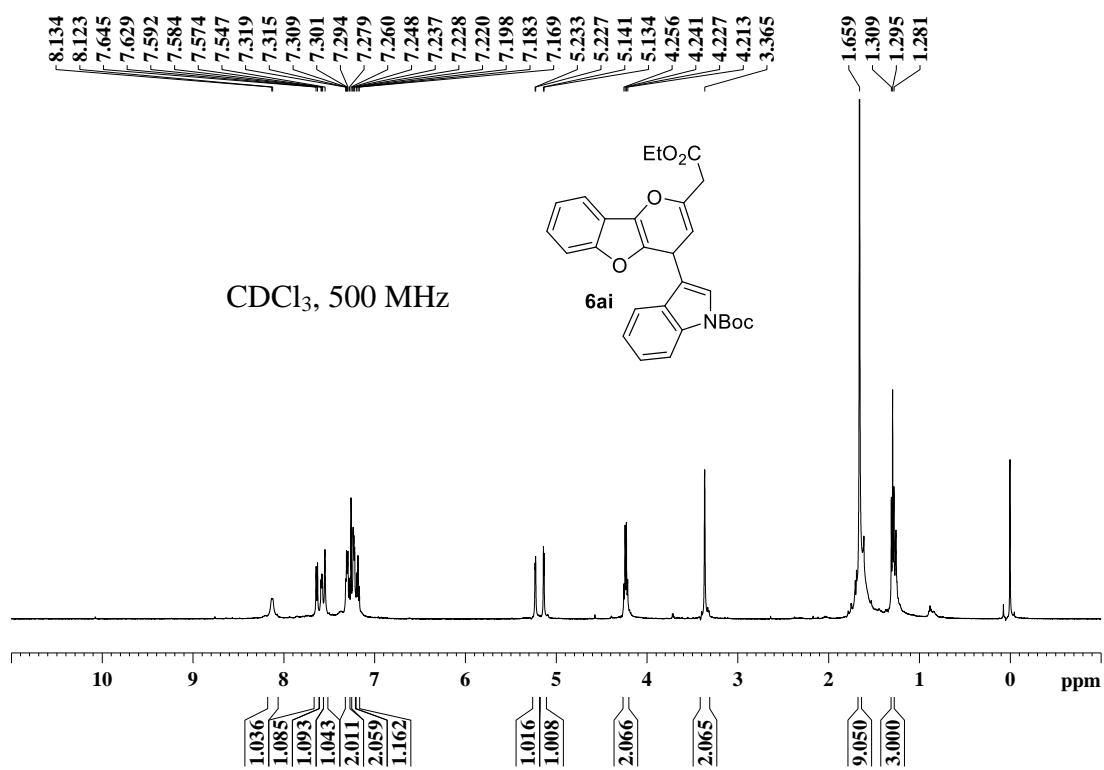

Figure S73: <sup>1</sup>H NMR spectrum of compound **6ai**

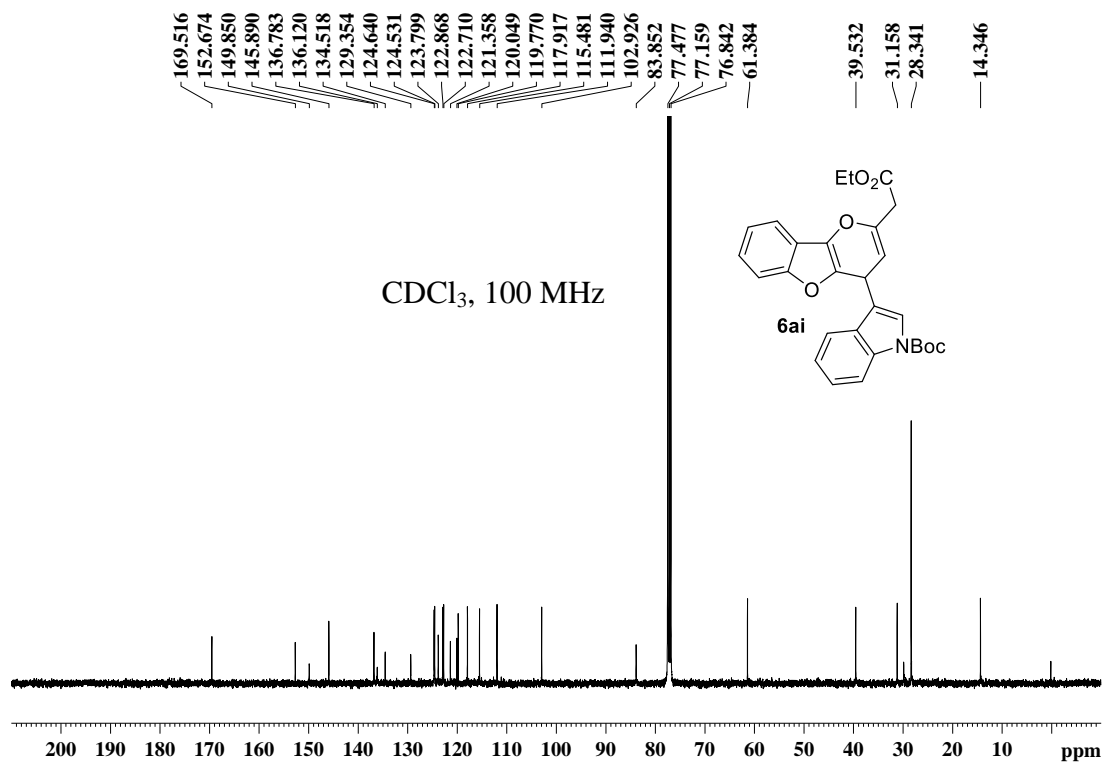

Figure S74: <sup>13</sup>C NMR spectrum of compound **6ai**

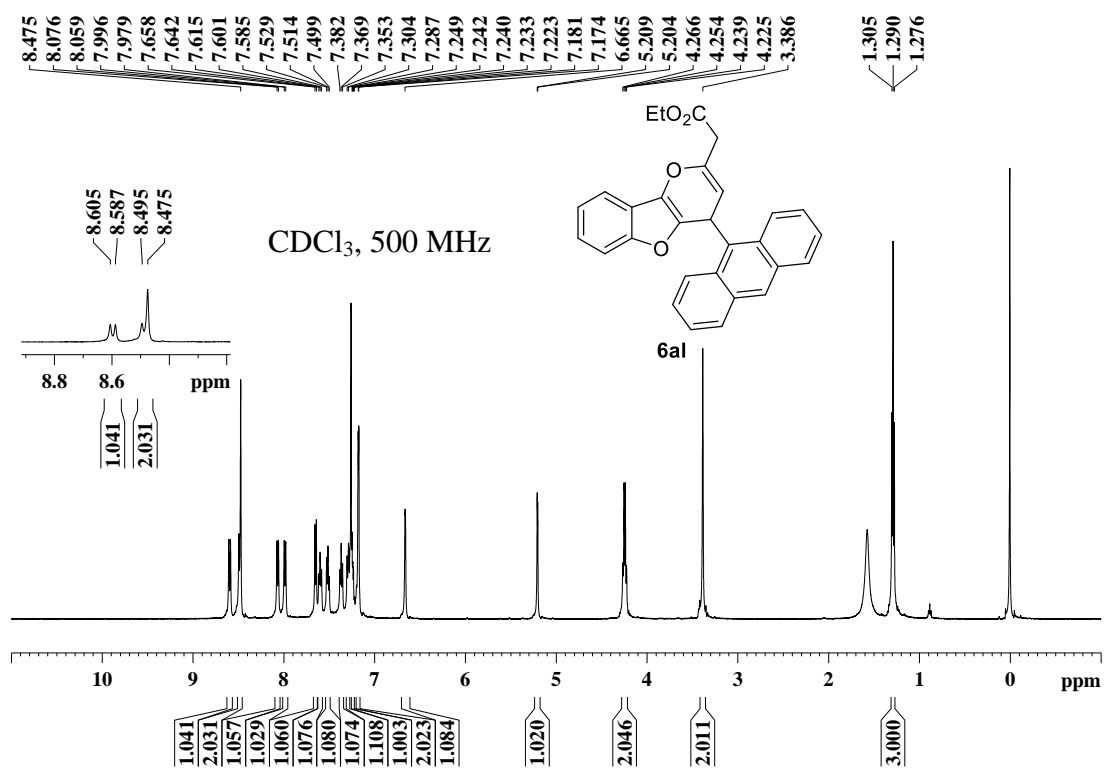

Figure S75: <sup>1</sup>H NMR spectrum of compound **6al**

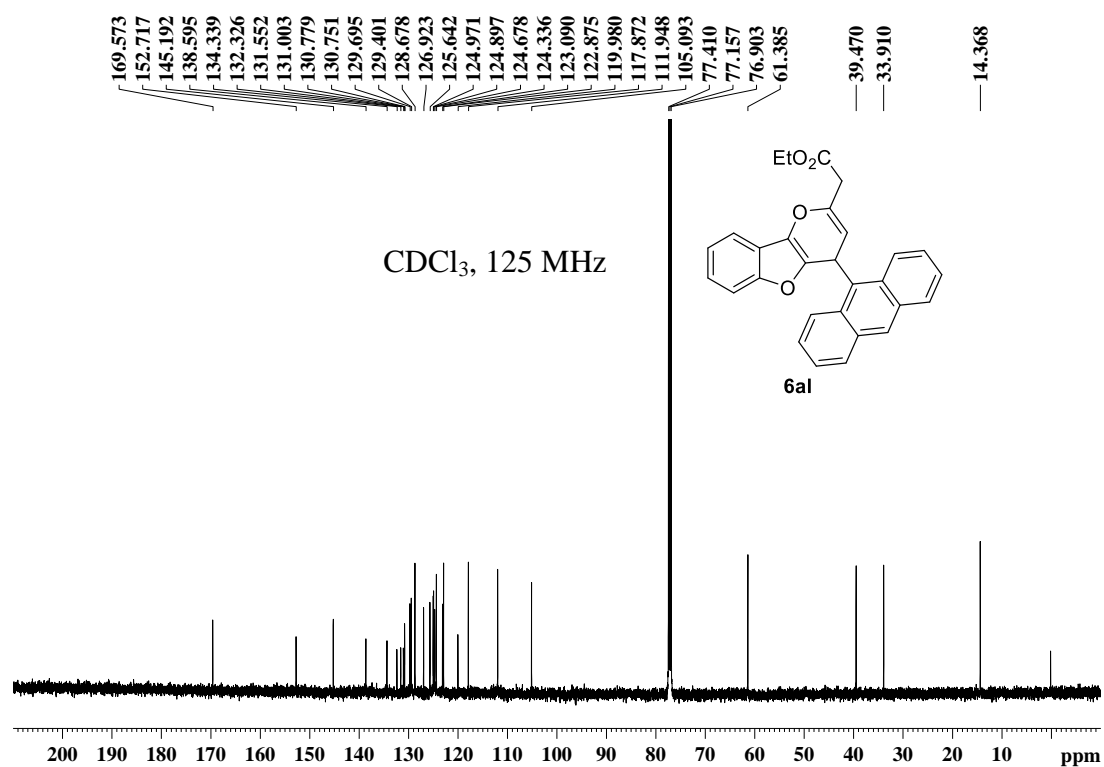

Figure S76: <sup>13</sup>C NMR spectrum of compound **6al**



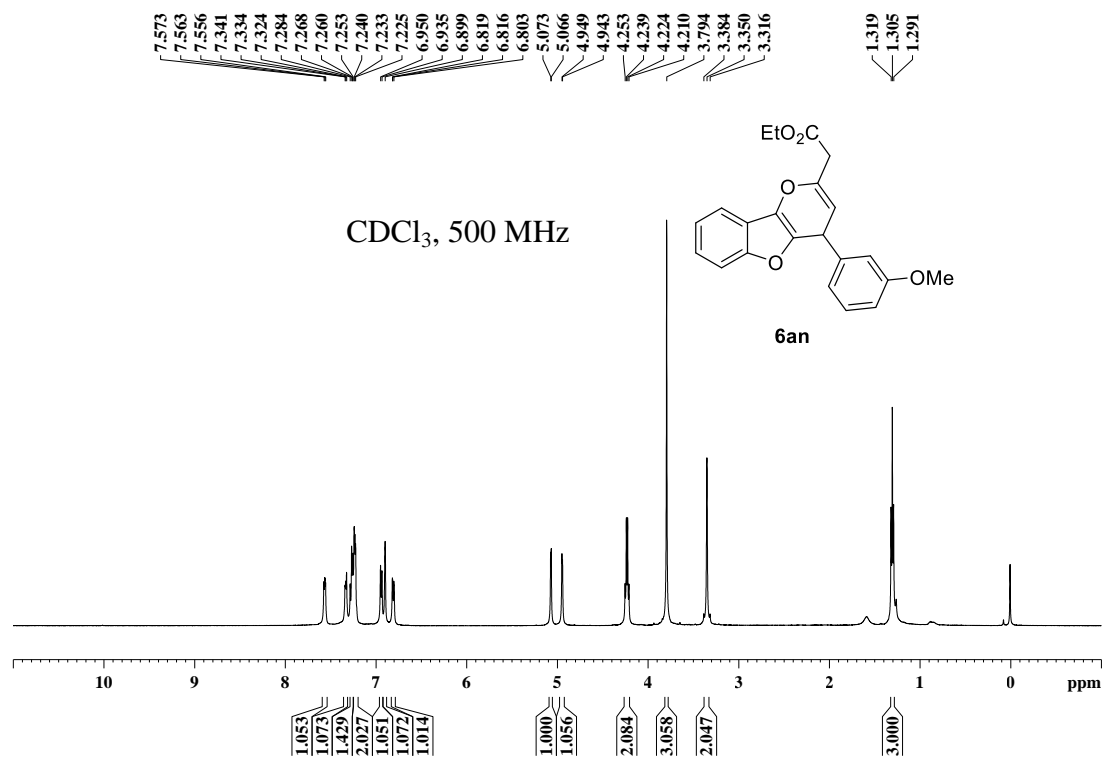

Figure S77:  $^1\text{H NMR}$  spectrum of compound **6an**

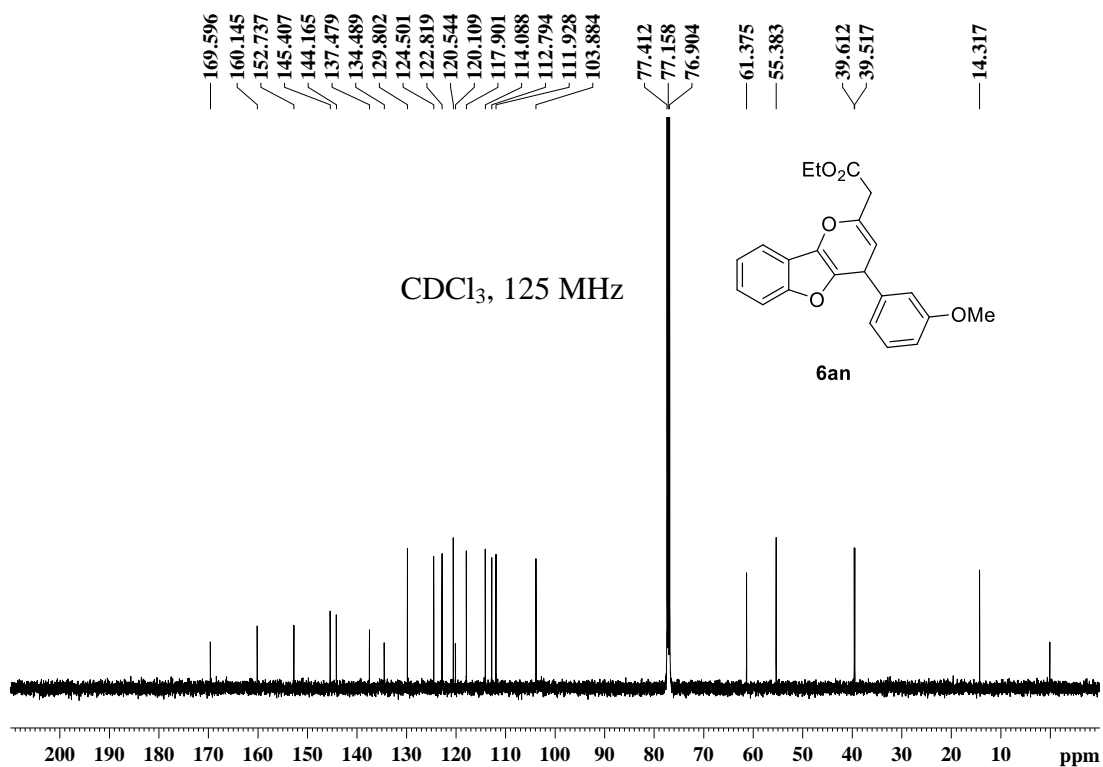

Figure S78:  $^{13}\text{C NMR}$  spectrum of compound **6an**

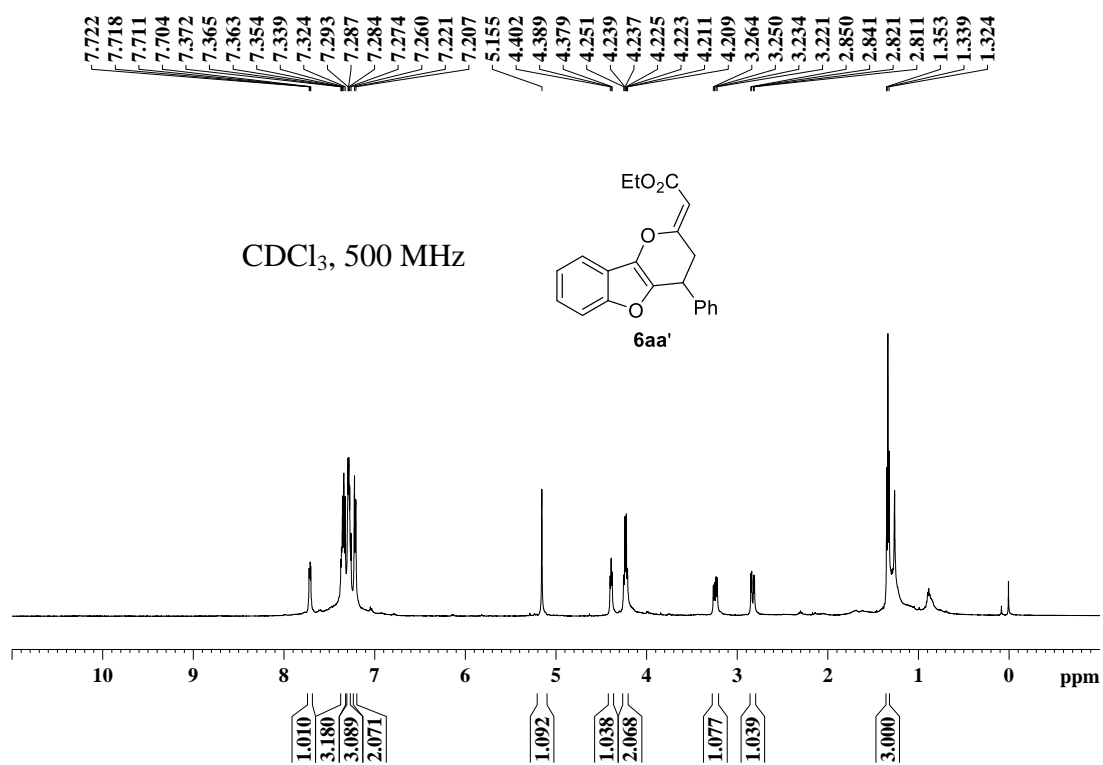

Figure S79: <sup>1</sup>H NMR spectrum of compound **6aa'**

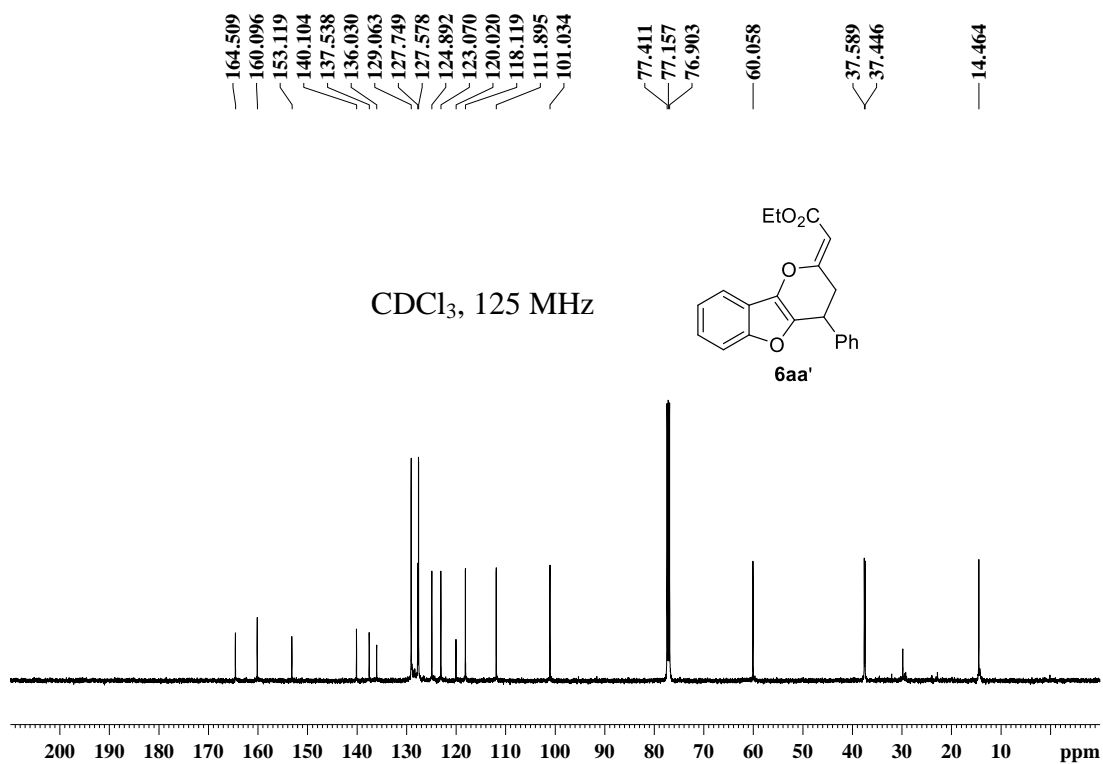

Figure S80: <sup>13</sup>C NMR spectrum of compound **6aa'**

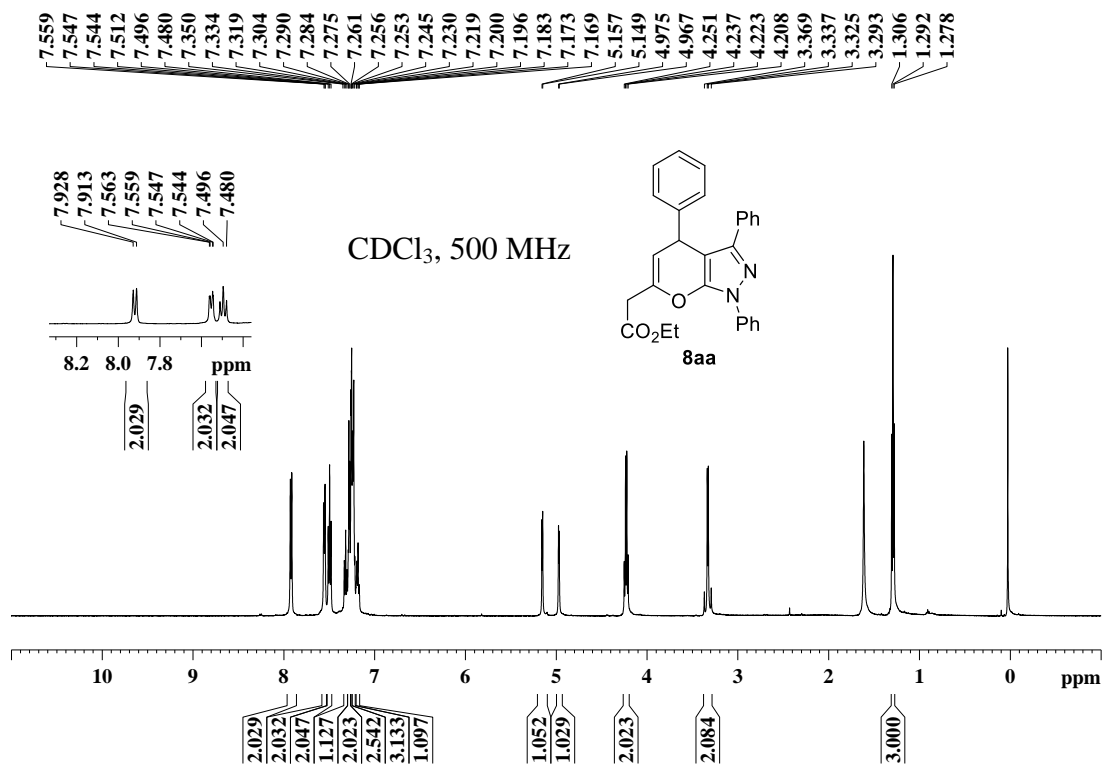

Figure S81: <sup>1</sup>H NMR spectrum of compound **8aa**

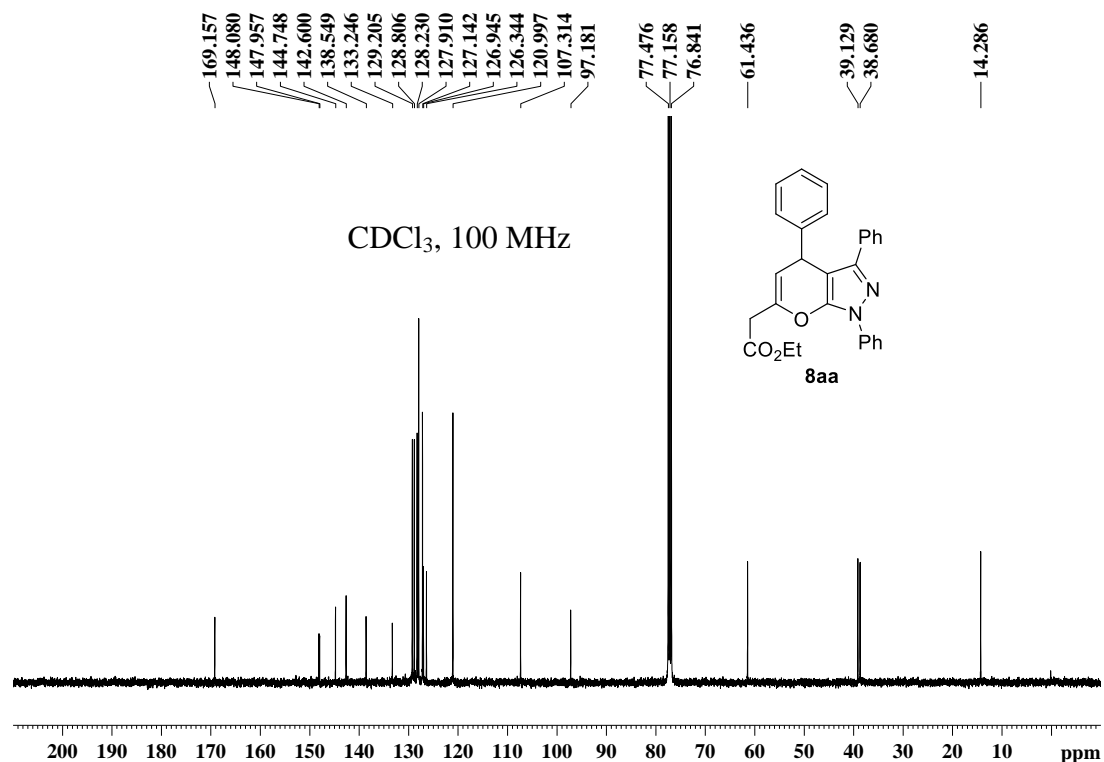

Figure S82: <sup>13</sup>C NMR spectrum of compound **8aa**

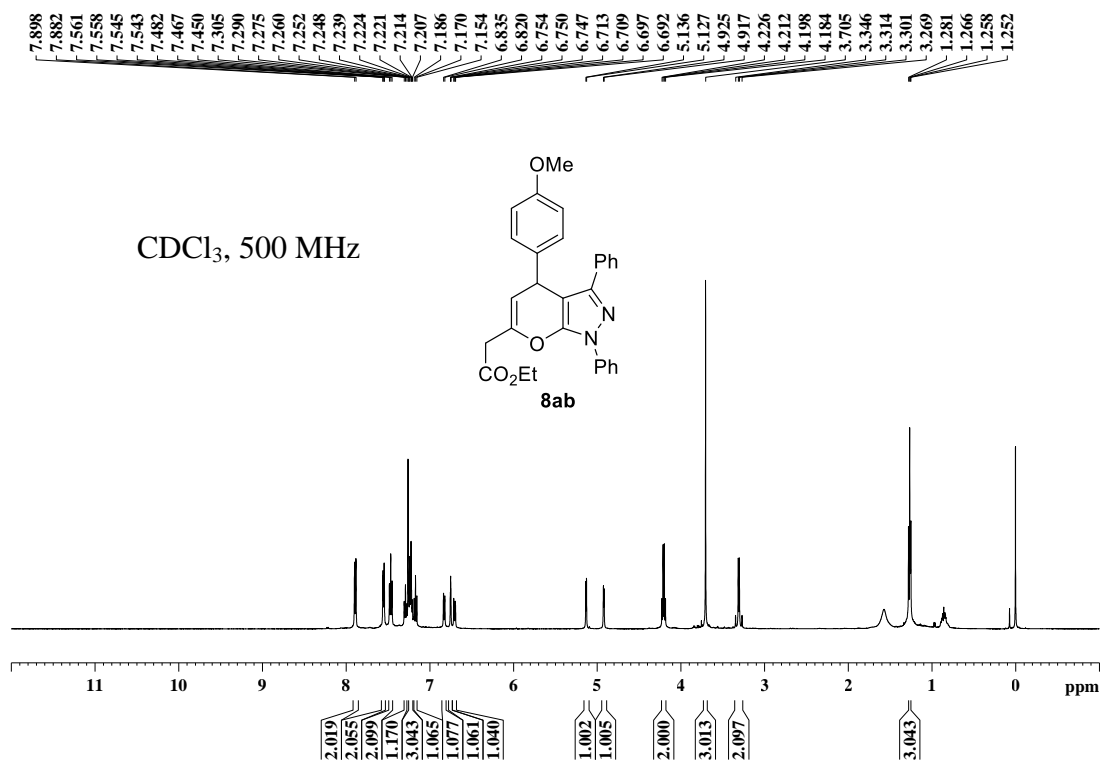

Figure S83: <sup>1</sup>H NMR spectrum of compound **8ab**

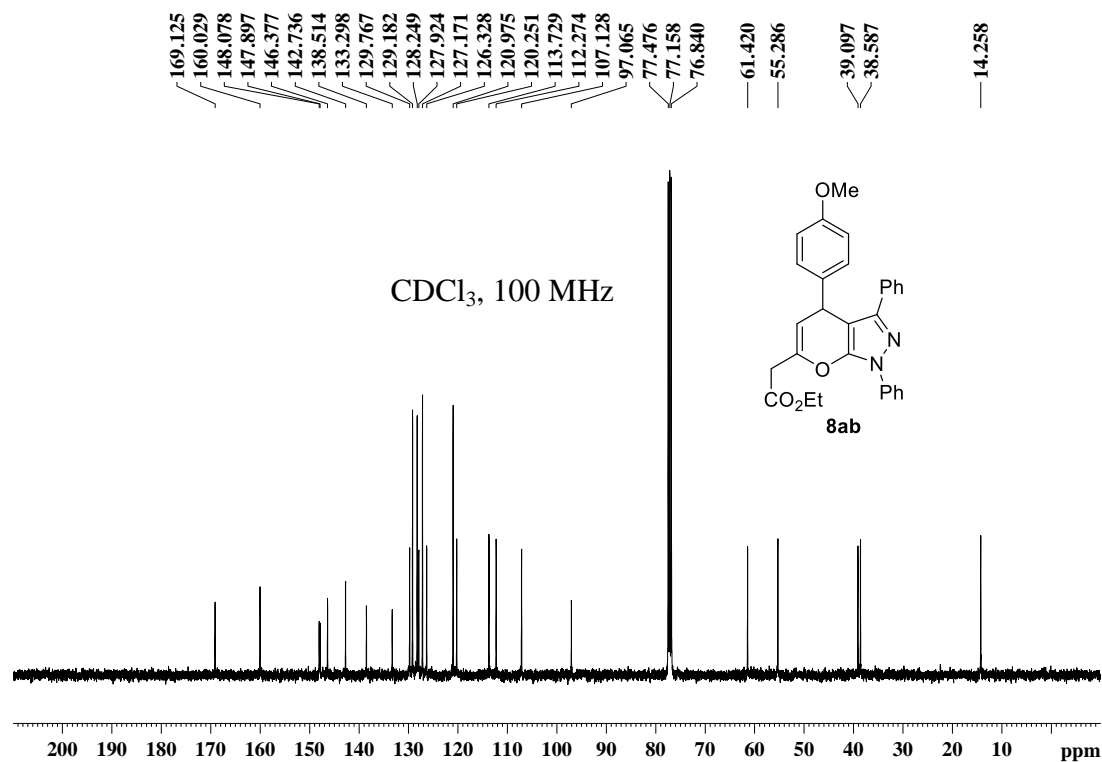

Figure S84: <sup>13</sup>C NMR spectrum of compound **8ab**

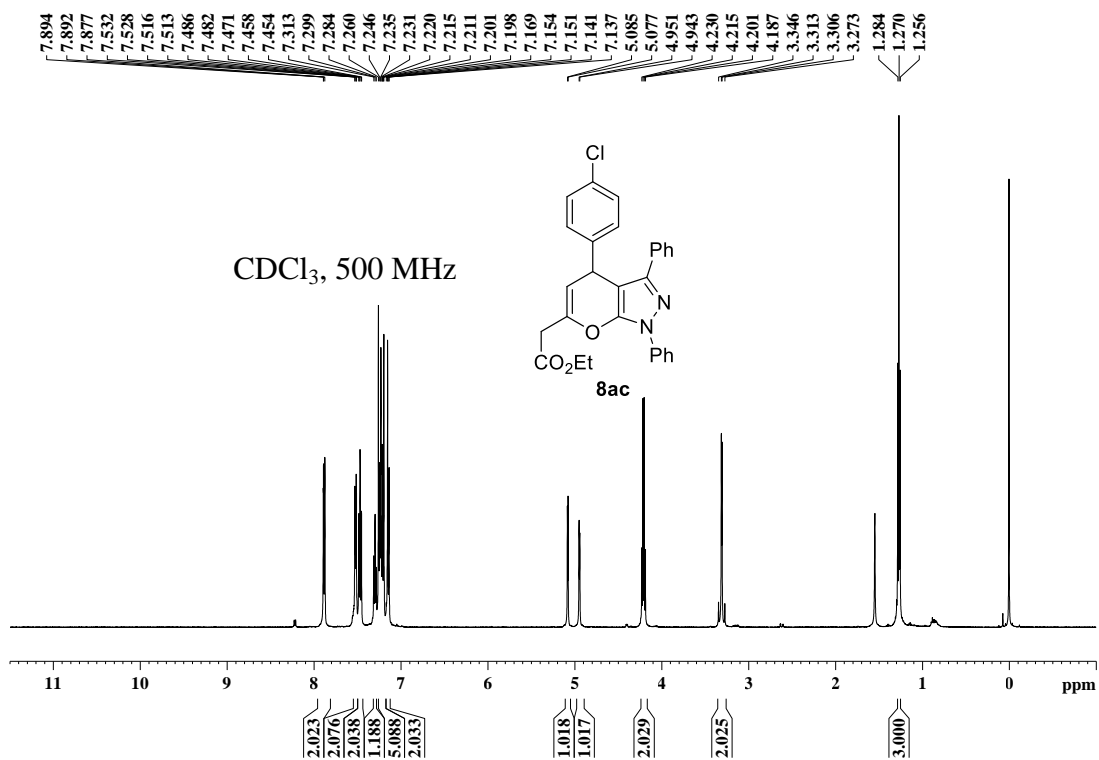

Figure S85: <sup>1</sup>H NMR spectrum of compound **8ac**

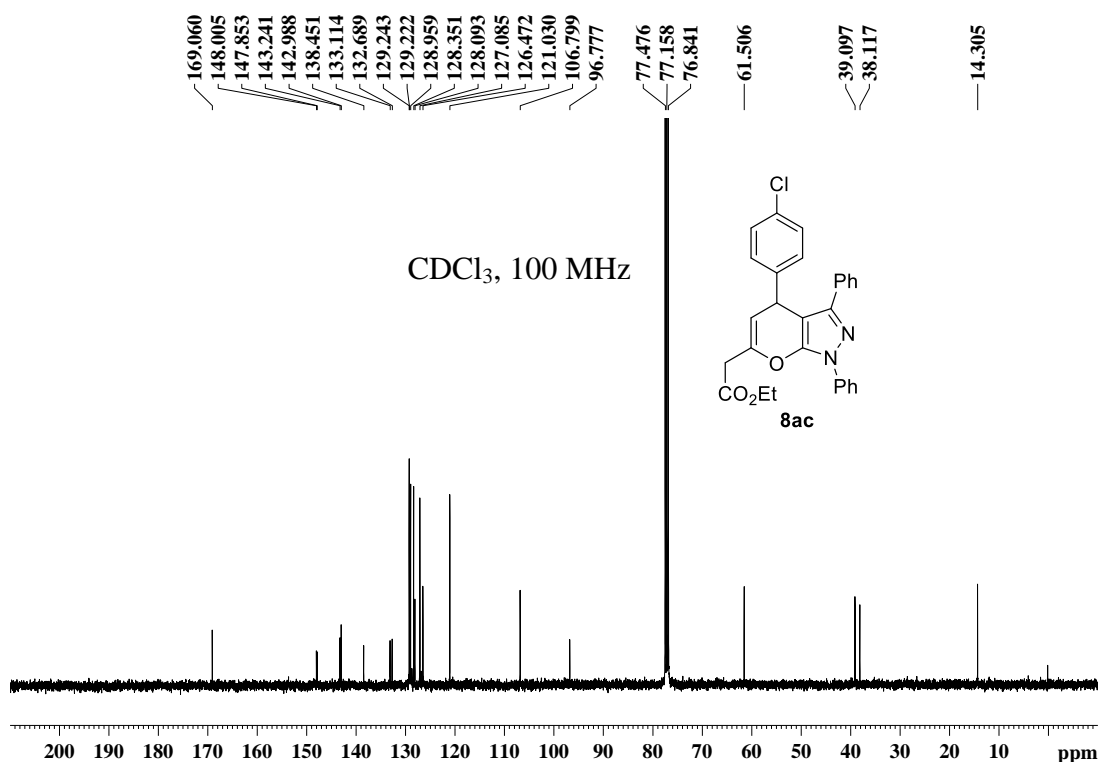

Figure S86: <sup>13</sup>C NMR spectrum of compound **8ac**

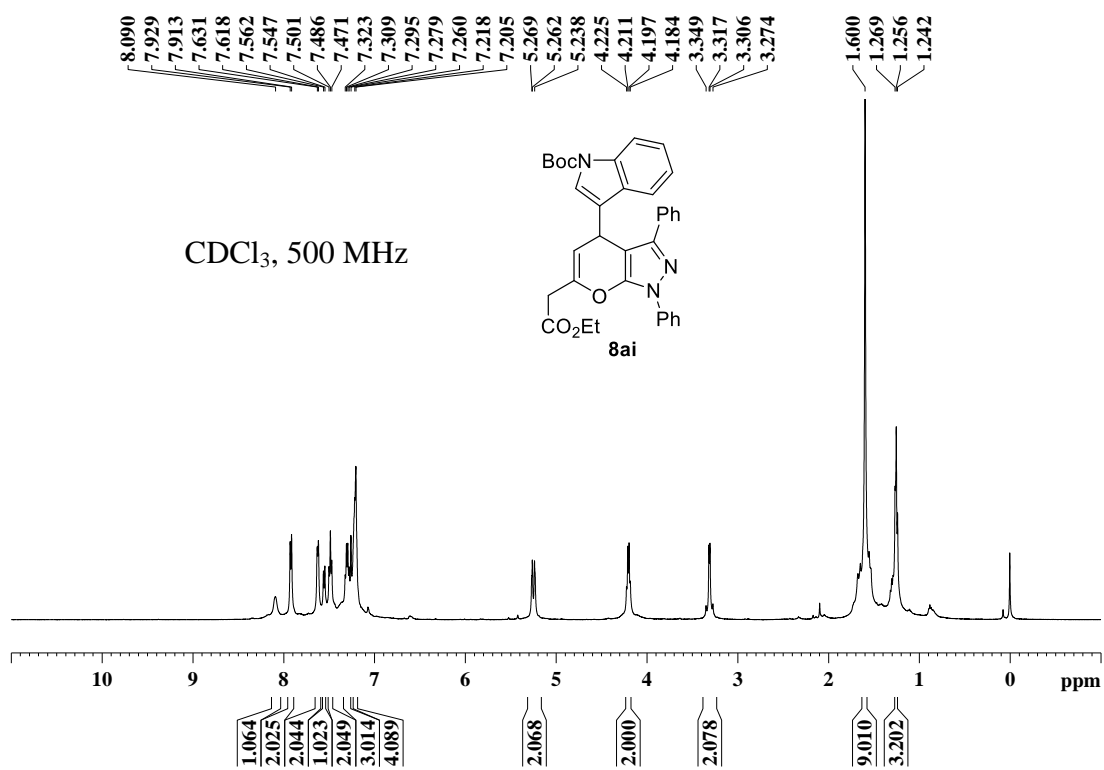

Figure S87: <sup>1</sup>H NMR spectrum of compound **8ai**

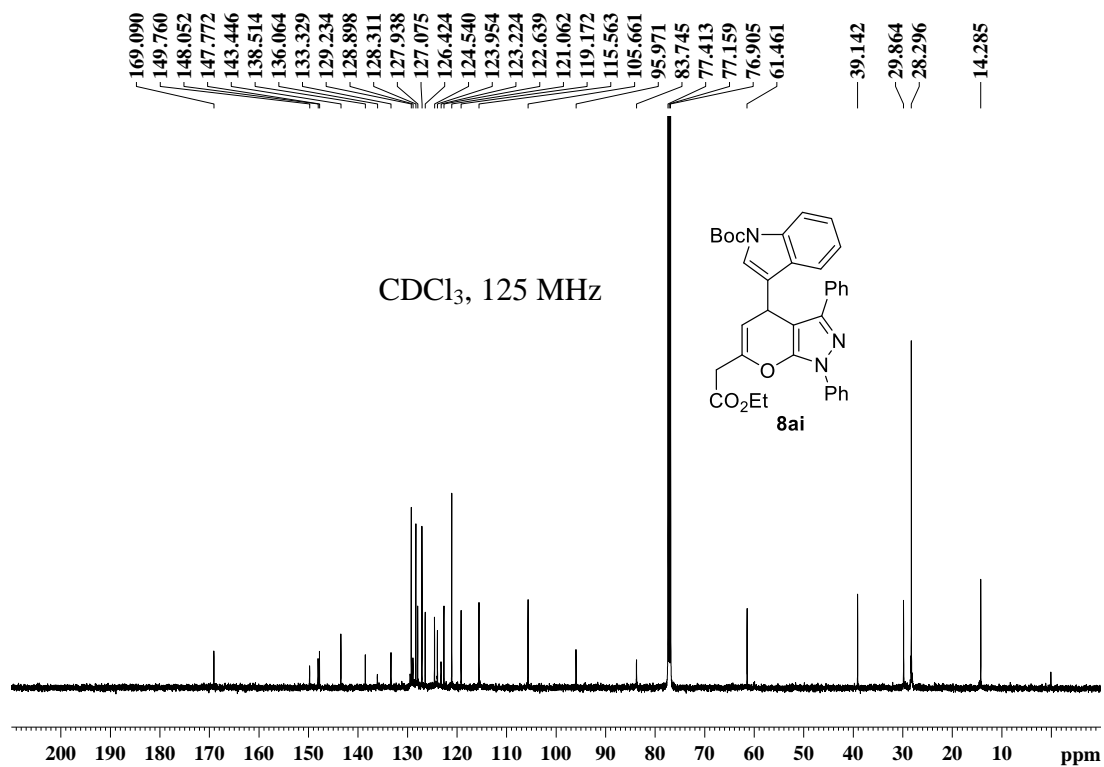

Figure S88: <sup>13</sup>C NMR spectrum of compound **8ai**

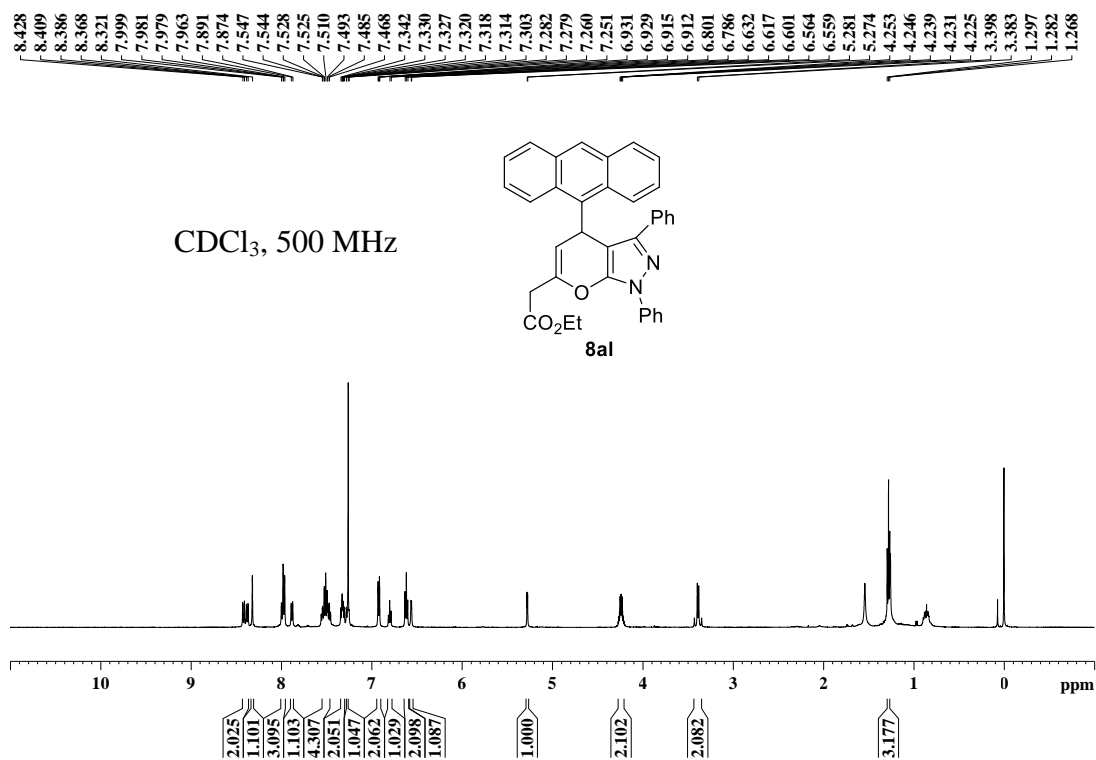

Figure S89: <sup>1</sup>H NMR spectrum of compound **8al**

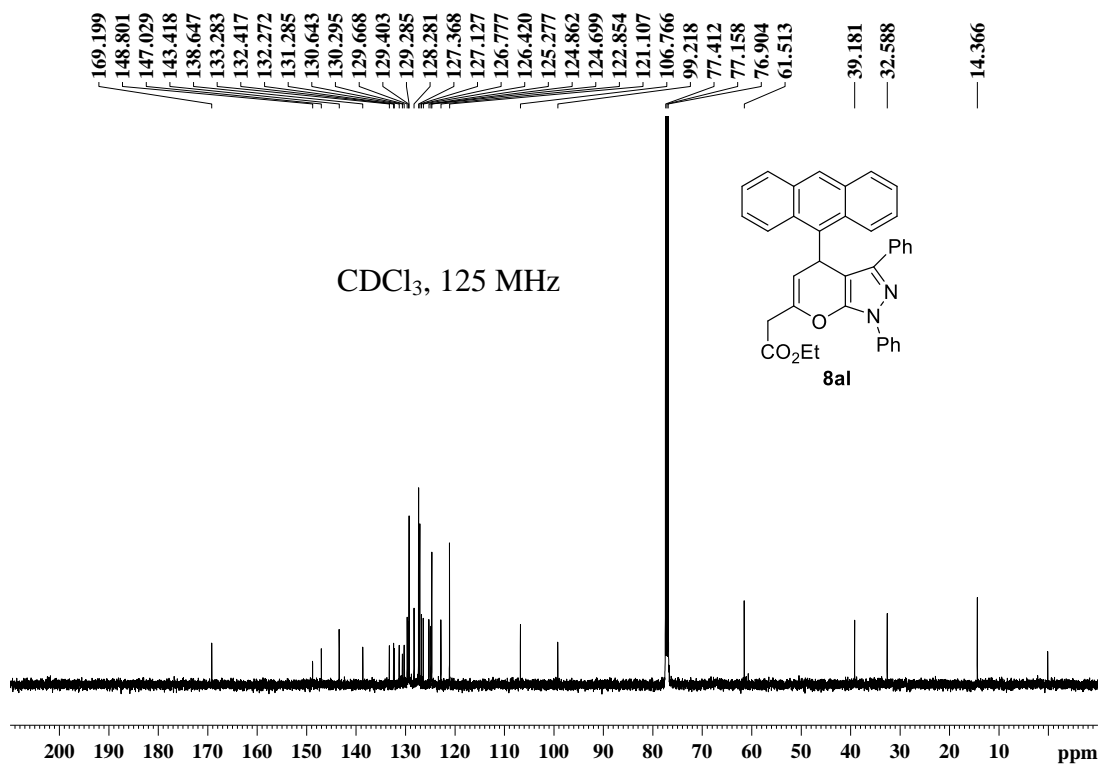

Figure S90: <sup>13</sup>C NMR spectrum of compound **8al**

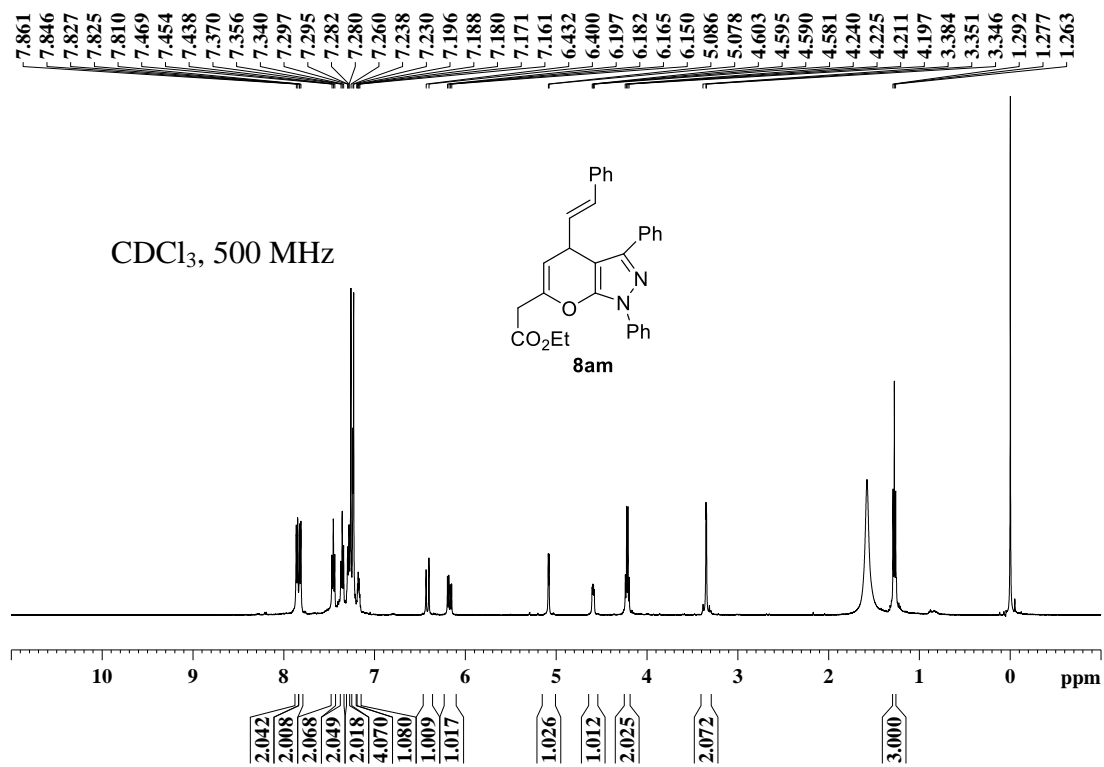

Figure S91: <sup>1</sup>H NMR spectrum of compound **8am**

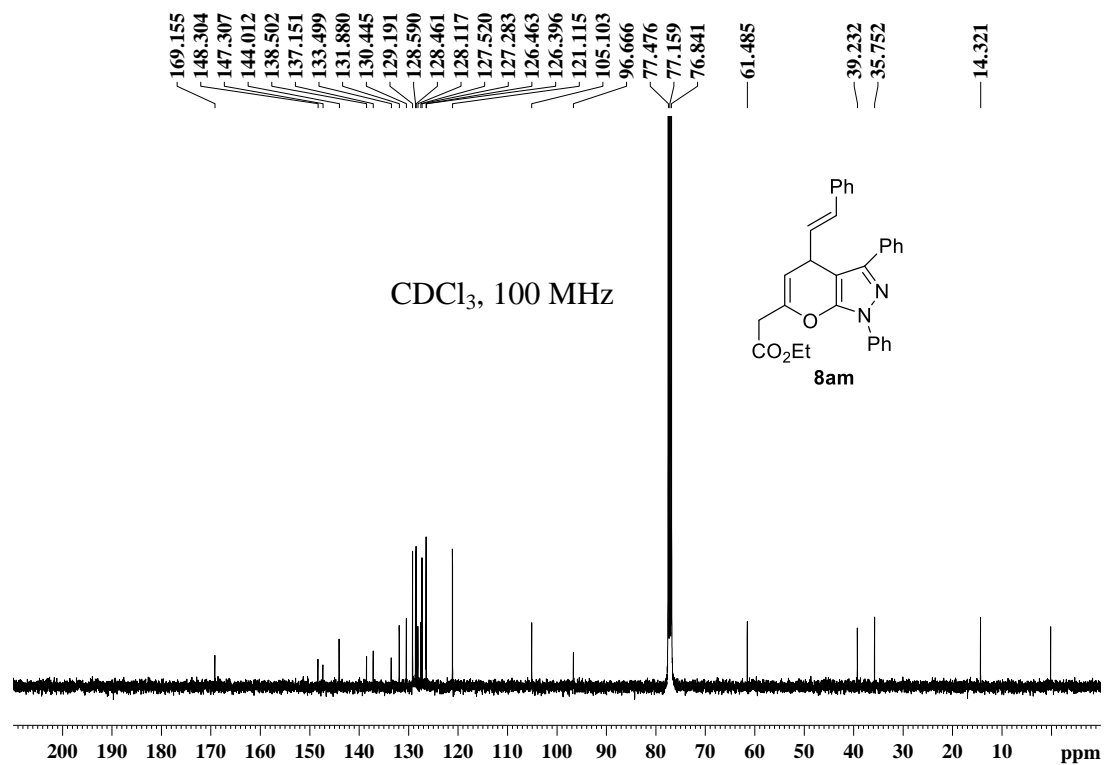

Figure S92: <sup>13</sup>C NMR spectrum of compound **8am**



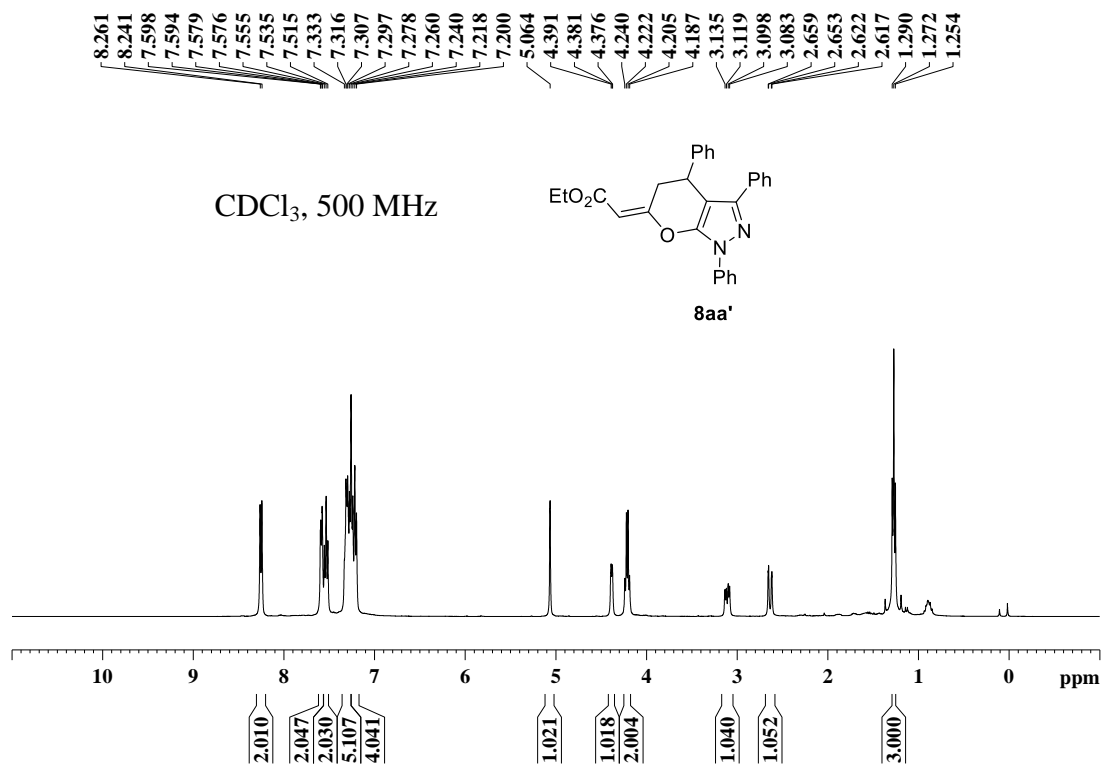

Figure S93: <sup>1</sup>H NMR spectrum of compound **8aa'**

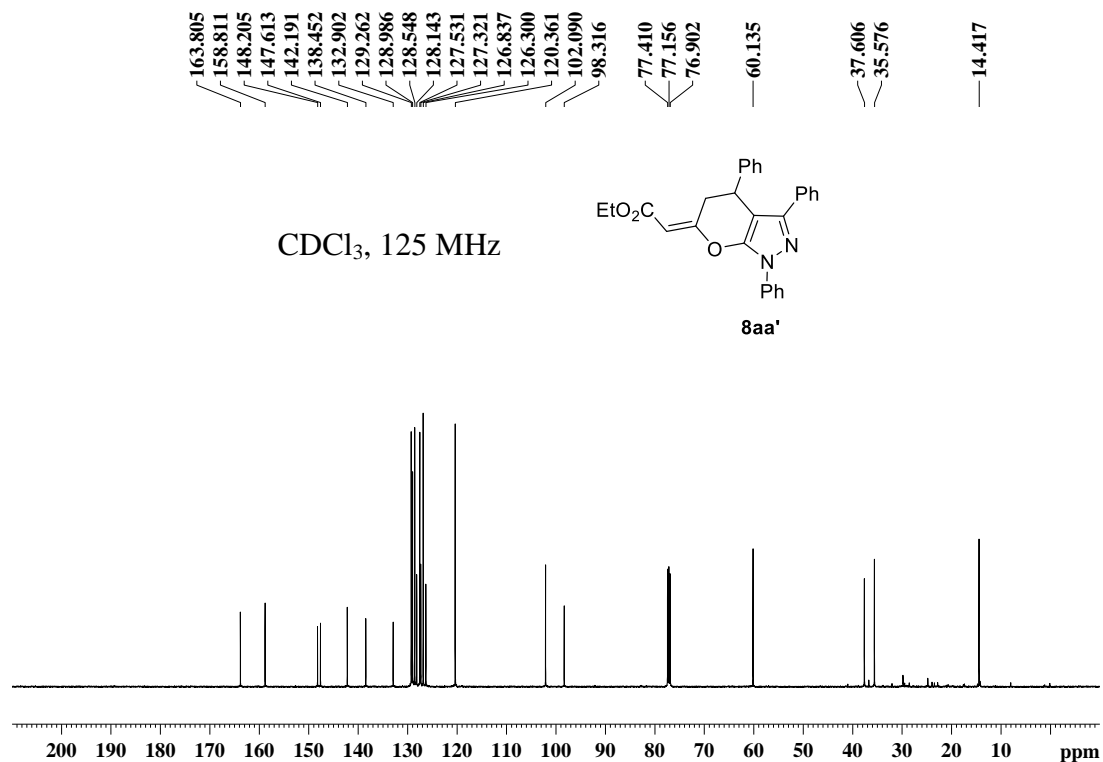

Figure S94: <sup>13</sup>C NMR spectrum of compound **8aa'**

### **(3) Reference:**

1. (a) Sheldrick, G. M. SADABS, Siemens Area Detector Absorption Correction, University of Gottingen, Germany, 1996; (b) Sheldrick, G. M. SHELX97- A program for crystal structure solution and refinement, University of Gottingen, 1997; (c) Sheldrick, G. M. SHELXTL NT Crystal Structure Analysis Package, Bruker AXS, Analytical Xray System, WI, USA, 1999, version 5.10; (d) Dolomanov, O.V.; Bourhis, L.J.; Gildea, R.J.; Howard, J.A.K.; Puschmann, H. *J. Appl. Cryst.* **2009**, *42*, 339; (e) Sheldrick, G.M. *Acta Cryst.* **2015**, *A71*, 3; *C71*, 3.
